# Supplementary material
Source: MDPI journal article supplement (https://www.mdpi.com/2071-1050/10/3/762)
Supplement: s1 [file s1]

**Table S3: Summary of descriptive analysis for RGR of different indices in the 2<sup>nd</sup> fully expanded leaf.** RGR: relative growth rate. Min represents minimum value, Max represents maximum value, Mean represents the average value, Std.dev represents standard deviation. P1 represents data set calculated with 3-day intervals from DAT20 to DAT23, by that analogy, we calculated P2 to P7 data sets. P1' represents data set calculated with 6-day intervals from DAT20 to DAT26, by that analogy, we calculated P2' and P3' data sets

| Data set | Index | N treatment |        |         |         | P treatment |        |         |         | K treatment |        |         |         | Normal nutrition supply |        |         |         |
|----------|-------|-------------|--------|---------|---------|-------------|--------|---------|---------|-------------|--------|---------|---------|-------------------------|--------|---------|---------|
|          |       | Min         | Max    | Mean    | Std.dev | Min         | Max    | Mean    | Std.dev | Min         | Max    | Mean    | Std.dev | Min                     | Max    | Mean    | Std.dev |
| P1       | LW    | -0.2087     | 0.2952 | 0.0249  | 0.0951  | -0.2089     | 0.1808 | 0.0119  | 0.0760  | -0.0827     | 0.1762 | 0.0299  | 0.0587  | -0.2095                 | 0.2756 | 0.0138  | 0.1229  |
|          | LL    | -0.0102     | 0.0358 | 0.0000  | 0.0074  | -0.0041     | 0.0112 | -0.0003 | 0.0028  | -0.0334     | 0.0109 | -0.0019 | 0.0056  | -0.0015                 | 0.0281 | 0.0025  | 0.0090  |
|          | LA    | -0.0238     | 0.1219 | 0.0014  | 0.0271  | -0.0457     | 0.0408 | -0.0004 | 0.0118  | -0.0825     | 0.0094 | -0.0034 | 0.0142  | -0.0039                 | 0.0558 | 0.0064  | 0.0176  |
|          | LP    | -0.0074     | 0.0584 | 0.0033  | 0.0100  | -0.0016     | 0.0137 | 0.0041  | 0.0039  | -0.0368     | 0.0242 | 0.0006  | 0.0081  | -0.0020                 | 0.0276 | 0.0052  | 0.0090  |
|          | EC    | -0.0003     | 0.0001 | 0.0000  | 0.0001  | -0.0001     | 0.0001 | 0.0000  | 0.0000  | -0.0002     | 0.0001 | 0.0000  | 0.0000  | -0.0001                 | 0.0002 | 0.0000  | 0.0001  |
|          | RE    | -0.2089     | 0.2010 | -0.0190 | 0.0890  | -0.1807     | 0.2181 | -0.0121 | 0.0772  | -0.1710     | 0.0759 | -0.0314 | 0.0569  | -0.2711                 | 0.2099 | -0.0101 | 0.1229  |
|          | AC    | -0.1963     | 0.1311 | -0.0002 | 0.0529  | -0.1012     | 0.1355 | 0.0036  | 0.0527  | -0.1284     | 0.1010 | -0.0107 | 0.0376  | -0.0607                 | 0.1387 | 0.0140  | 0.0572  |
|          | CI    | -0.2016     | 0.2679 | 0.0249  | 0.0929  | -0.2087     | 0.1830 | 0.0122  | 0.0762  | -0.0824     | 0.1783 | 0.0318  | 0.0581  | -0.2086                 | 0.2771 | 0.0113  | 0.1246  |
|          | FF    | -0.0468     | 0.0654 | -0.0007 | 0.0181  | -0.0465     | 0.0401 | -0.0086 | 0.0144  | -0.0504     | 0.0173 | -0.0047 | 0.0131  | -0.0167                 | 0.0097 | -0.0047 | 0.0084  |
|          | R     | -0.0444     | 0.0855 | 0.0325  | 0.0308  | -0.1310     | 0.1707 | 0.0690  | 0.0667  | -0.0618     | 0.0927 | 0.0082  | 0.0354  | -0.0488                 | 0.1105 | 0.0160  | 0.0445  |
|          | G     | -0.0331     | 0.0366 | 0.0122  | 0.0138  | -0.0473     | 0.0689 | 0.0199  | 0.0293  | -0.0303     | 0.0315 | -0.0017 | 0.0150  | -0.0515                 | 0.0332 | 0.0000  | 0.0219  |
|          | B     | -0.2561     | 0.1984 | -0.0058 | 0.0858  | -0.2049     | 0.2259 | 0.0302  | 0.0917  | -0.1229     | 0.2690 | 0.0096  | 0.0719  | -0.0592                 | 0.2270 | 0.0149  | 0.0820  |
|          | H     | -0.0045     | 0.0047 | -0.0012 | 0.0017  | -0.0043     | 0.0017 | -0.0012 | 0.0013  | -0.0040     | 0.0069 | 0.0002  | 0.0024  | -0.0015                 | 0.0026 | 0.0001  | 0.0013  |
|          | S     | -0.0061     | 0.0159 | 0.0014  | 0.0037  | -0.0169     | 0.0133 | 0.0014  | 0.0043  | -0.0104     | 0.0219 | 0.0010  | 0.0056  | -0.0088                 | 0.0108 | -0.0006 | 0.0058  |
|          | BR    | -0.0313     | 0.0430 | 0.0168  | 0.0160  | -0.0703     | 0.0879 | 0.0306  | 0.0376  | -0.0280     | 0.0512 | 0.0012  | 0.0185  | -0.0513                 | 0.0263 | -0.0068 | 0.0247  |
|          | NRI   | -0.0251     | 0.0524 | 0.0143  | 0.0148  | -0.0372     | 0.0796 | 0.0327  | 0.0249  | -0.0396     | 0.0312 | 0.0045  | 0.0167  | -0.0149                 | 0.0191 | 0.0001  | 0.0101  |
|          | NGI   | -0.0390     | 0.0238 | -0.0059 | 0.0132  | -0.1320     | 0.1698 | -0.0052 | 0.0663  | -0.0450     | 0.0161 | -0.0053 | 0.0130  | -0.0271                 | 0.0312 | -0.0004 | 0.0141  |
|          | NBI   | -0.2395     | 0.1559 | -0.0240 | 0.0807  | -0.0508     | 0.0515 | -0.0174 | 0.0201  | -0.1223     | 0.1925 | 0.0060  | 0.0636  | -0.1748                 | 0.0894 | -0.0021 | 0.0707  |
|          | DGCI  | -0.0317     | 0.0439 | 0.0171  | 0.0163  | -0.0713     | 0.0896 | 0.0313  | 0.0383  | -0.0285     | 0.0520 | 0.0013  | 0.0189  | -0.0521                 | 0.0268 | -0.0070 | 0.0251  |
|          | GRVI  | -0.3005     | 0.1460 | -0.0550 | 0.0763  | -0.1696     | 0.2779 | -0.0848 | 0.0747  | -0.6483     | 0.0506 | -0.0422 | 0.1184  | -0.0852                 | 0.0649 | -0.0121 | 0.0366  |
|          | IKAW  | -0.1124     | 0.1384 | 0.0229  | 0.0564  | -0.0839     | 0.1652 | 0.0330  | 0.0548  | -0.1346     | 0.0690 | -0.0058 | 0.0566  | -0.0320                 | 0.0608 | 0.0203  | 0.0300  |
|          | IPCA  | -0.0863     | 0.0666 | 0.0150  | 0.0306  | -0.0495     | 0.0932 | 0.0200  | 0.0305  | -0.1246     | 0.0347 | -0.0097 | 0.0341  | -0.0458                 | 0.0323 | -0.0029 | 0.0263  |
| P2       | LW    | -0.2367     | 0.1623 | -0.0133 | 0.0859  | -0.5614     | 0.1714 | -0.0332 | 0.1206  | -0.1732     | 0.2255 | -0.0176 | 0.0876  | -0.1427                 | 0.0680 | -0.0240 | 0.0717  |
|          | LL    | -0.0109     | 0.0047 | -0.0001 | 0.0029  | -1.3134     | 0.0533 | -0.0304 | 0.2031  | -0.0039     | 0.0065 | 0.0009  | 0.0021  | -0.0351                 | 0.0497 | 0.0012  | 0.0215  |
|          | LA    | -0.1824     | 0.0256 | -0.0035 | 0.0287  | -2.0648     | 0.1470 | -0.0508 | 0.3200  | -0.0269     | 0.0164 | -0.0028 | 0.0079  | -0.0727                 | 0.1032 | 0.0005  | 0.0451  |
|          | LP    | -0.0206     | 0.0164 | -0.0009 | 0.0077  | -1.1932     | 0.0479 | -0.0270 | 0.1846  | -0.0238     | 0.0115 | 0.0009  | 0.0057  | -0.0347                 | 0.0509 | 0.0041  | 0.0220  |
|          | EC    | -0.0002     | 0.0003 | 0.0000  | 0.0001  | -0.0672     | 0.0001 | -0.0016 | 0.0104  | -0.0001     | 0.0002 | 0.0000  | 0.0000  | 0.0000                  | 0.0001 | 0.0000  | 0.0001  |
|          | RE    | -0.1711     | 0.2389 | 0.0100  | 0.0828  | -0.1900     | 0.1616 | 0.0128  | 0.0913  | -0.2505     | 0.1687 | 0.0140  | 0.0894  | -0.0746                 | 0.1328 | 0.0231  | 0.0639  |

| Data set | Index | N treatment |        |         |         | P treatment |        |         |         | K treatment |         |         |         | Normal nutrition supply |         |         |         |
|----------|-------|-------------|--------|---------|---------|-------------|--------|---------|---------|-------------|---------|---------|---------|-------------------------|---------|---------|---------|
|          |       | Min         | Max    | Mean    | Std.dev | Min         | Max    | Mean    | Std.dev | Min         | Max     | Mean    | Std.dev | Min                     | Max     | Mean    | Std.dev |
|          | AC    | -0.1348     | 0.2069 | -0.0055 | 0.0528  | -0.1614     | 0.1130 | -0.0015 | 0.0525  | -0.1254     | 0.0865  | 0.0056  | 0.0422  | -0.0398                 | 0.1110  | 0.0179  | 0.0476  |
|          | CI    | -0.2364     | 0.1697 | -0.0132 | 0.0865  | -0.1751     | 0.7520 | -0.0028 | 0.1466  | -0.1749     | 0.2275  | -0.0185 | 0.0884  | -0.1418                 | 0.0687  | -0.0251 | 0.0655  |
|          | FF    | -0.1957     | 0.0429 | -0.0016 | 0.0335  | -0.0970     | 0.3217 | 0.0032  | 0.0548  | -0.0307     | 0.0489  | -0.0046 | 0.0147  | -0.0281                 | 0.0104  | -0.0080 | 0.0126  |
|          | R     | -0.0123     | 0.2715 | 0.0840  | 0.0644  | -0.1253     | 0.2985 | 0.0069  | 0.0695  | -0.0113     | 0.1484  | 0.0631  | 0.0443  | -0.0194                 | 0.1440  | 0.0592  | 0.0576  |
|          | G     | -0.0229     | 0.0756 | 0.0150  | 0.0190  | -0.0419     | 0.0564 | 0.0017  | 0.0221  | -0.0033     | 0.0564  | 0.0204  | 0.0170  | -0.0230                 | 0.0729  | 0.0108  | 0.0281  |
|          | B     | -0.1108     | 0.4366 | 0.1083  | 0.1188  | -0.2286     | 0.3016 | 0.0003  | 0.1068  | -0.1961     | 0.4064  | 0.0382  | 0.1124  | -0.0017                 | 0.4878  | 0.2012  | 0.1863  |
|          | H     | -0.0236     | 0.0009 | -0.0055 | 0.0058  | -0.0205     | 0.0004 | -0.0035 | 0.0039  | -0.0087     | 0.0019  | -0.0025 | 0.0024  | -0.0054                 | 0.0003  | -0.0026 | 0.0022  |
|          | S     | -0.0278     | 0.0062 | -0.0049 | 0.0073  | -0.0207     | 0.0173 | -0.0043 | 0.0075  | -0.0235     | 0.0074  | -0.0034 | 0.0070  | -0.0134                 | 0.0106  | -0.0005 | 0.0073  |
|          | BR    | -0.0077     | 0.1301 | 0.0367  | 0.0287  | -0.0644     | 0.1052 | 0.0041  | 0.0331  | -0.0040     | 0.0785  | 0.0304  | 0.0215  | -0.0231                 | 0.0776  | 0.0279  | 0.0370  |
|          | NRI   | -0.0355     | 0.1068 | 0.0321  | 0.0302  | -0.0397     | 0.1329 | 0.0021  | 0.0275  | -0.0088     | 0.0984  | 0.0268  | 0.0241  | -0.0343                 | 0.0400  | 0.0065  | 0.0225  |
|          | NGI   | -0.1067     | 0.1111 | -0.0338 | 0.0386  | -0.1429     | 0.1516 | -0.0069 | 0.0690  | -0.0550     | 0.0292  | -0.0154 | 0.0142  | -0.0416                 | 0.0346  | -0.0047 | 0.0198  |
|          | NBI   | -0.0938     | 0.3571 | 0.0532  | 0.0939  | -0.1697     | 0.0615 | -0.0008 | 0.0364  | -0.2527     | 0.3253  | -0.0032 | 0.0971  | -0.1727                 | 0.1523  | -0.0070 | 0.0846  |
|          | DGCI  | -0.0079     | 0.1322 | 0.0372  | 0.0291  | -0.0656     | 0.1069 | 0.0042  | 0.0337  | -0.0040     | 0.0797  | 0.0310  | 0.0219  | -0.0234                 | 0.0789  | 0.0285  | 0.0377  |
|          | GRVI  | -0.8931     | 0.0150 | -0.1913 | 0.2063  | -0.3376     | 0.1439 | -0.0144 | 0.0953  | -0.4864     | 0.1044  | -0.0869 | 0.0878  | -0.0696                 | 0.1016  | -0.0070 | 0.0550  |
|          | IKAW  | -0.3346     | 0.1209 | -0.0148 | 0.0795  | -0.1183     | 0.1422 | 0.0061  | 0.0466  | -0.2184     | 0.1867  | 0.0195  | 0.0739  | -0.1551                 | 0.0346  | -0.0262 | 0.0532  |
|          | IPCA  | -0.2066     | 0.0664 | -0.0018 | 0.0483  | -0.0653     | 0.0972 | 0.0049  | 0.0302  | -0.0530     | 0.1266  | 0.0189  | 0.0333  | -0.0288                 | 0.0767  | 0.0193  | 0.0351  |
| P3       | LW    | -0.2292     | 0.2457 | -0.0017 | 0.0768  | -0.1587     | 0.5524 | -0.0074 | 0.1097  | -0.1632     | 0.1386  | -0.0028 | 0.0773  | -0.1692                 | 0.0506  | -0.0185 | 0.0764  |
|          | LL    | -0.0526     | 0.0213 | 0.0007  | 0.0096  | -0.0536     | 1.3132 | 0.0324  | 0.2029  | -0.0018     | 0.0028  | 0.0003  | 0.0010  | -0.0505                 | 0.0104  | -0.0051 | 0.0175  |
|          | LA    | -0.1087     | 0.0166 | -0.0033 | 0.0178  | -0.1009     | 2.0664 | 0.0523  | 0.3203  | -0.0337     | 0.0364  | -0.0018 | 0.0126  | -0.1008                 | 0.0147  | -0.0067 | 0.0335  |
|          | LP    | -0.0698     | 0.0182 | -0.0097 | 0.0132  | -0.0534     | 1.1936 | 0.0179  | 0.1864  | -0.0219     | -0.0002 | -0.0097 | 0.0054  | -0.0518                 | -0.0034 | -0.0164 | 0.0137  |
|          | EC    | -0.0001     | 0.0001 | 0.0000  | 0.0001  | -0.0001     | 0.0672 | 0.0016  | 0.0104  | -0.0001     | 0.0001  | 0.0000  | 0.0000  | 0.0000                  | 0.0001  | 0.0000  | 0.0000  |
|          | RE    | -0.2462     | 0.2235 | -0.0022 | 0.0761  | -0.1643     | 0.2009 | 0.0273  | 0.0684  | -0.1414     | 0.1574  | 0.0007  | 0.0781  | -0.0978                 | 0.1645  | 0.0165  | 0.0809  |
|          | AC    | -0.1908     | 0.1452 | -0.0050 | 0.0558  | -0.1149     | 0.1716 | 0.0135  | 0.0515  | -0.0933     | 0.0756  | -0.0108 | 0.0411  | -0.0628                 | 0.0624  | -0.0126 | 0.0361  |
|          | CI    | -0.2318     | 0.2286 | -0.0024 | 0.0786  | -0.7608     | 0.1636 | -0.0398 | 0.1301  | -0.1638     | 0.1389  | -0.0030 | 0.0777  | -0.1796                 | 0.0979  | -0.0134 | 0.0847  |
|          | FF    | -0.0425     | 0.0504 | 0.0162  | 0.0189  | -0.3208     | 0.0724 | 0.0166  | 0.0559  | -0.0305     | 0.0493  | 0.0177  | 0.0180  | 0.0028                  | 0.0488  | 0.0260  | 0.0126  |
|          | R     | -0.0114     | 0.1088 | 0.0374  | 0.0287  | 0.0040      | 0.1233 | 0.0606  | 0.0294  | 0.0028      | 0.1622  | 0.0656  | 0.0412  | -0.0100                 | 0.1395  | 0.0338  | 0.0460  |
|          | G     | -0.0766     | 0.0621 | 0.0016  | 0.0230  | -0.0601     | 0.0554 | 0.0058  | 0.0212  | -0.0360     | 0.0665  | 0.0086  | 0.0239  | -0.0100                 | 0.0468  | 0.0078  | 0.0168  |
|          | B     | -0.0349     | 0.3743 | 0.1632  | 0.1037  | -0.0452     | 0.4426 | 0.1883  | 0.1146  | -0.1033     | 0.4773  | 0.2178  | 0.1530  | -0.0778                 | 0.0980  | -0.0229 | 0.0464  |
|          | H     | -0.0149     | 0.0056 | -0.0020 | 0.0042  | -0.0076     | 0.0067 | -0.0010 | 0.0031  | -0.0105     | 0.0042  | -0.0008 | 0.0029  | -0.0041                 | 0.0053  | -0.0001 | 0.0031  |
|          | S     | -0.0388     | 0.0063 | -0.0123 | 0.0124  | -0.0414     | 0.0063 | -0.0166 | 0.0135  | -0.0410     | 0.0130  | -0.0134 | 0.0144  | -0.0347                 | 0.0108  | -0.0118 | 0.0191  |
|          | BR    | -0.0682     | 0.0755 | 0.0160  | 0.0242  | -0.0621     | 0.0757 | 0.0242  | 0.0257  | -0.0264     | 0.0938  | 0.0284  | 0.0287  | -0.0084                 | 0.0768  | 0.0256  | 0.0249  |

| Data set | Index | N treatment |         |         |         | P treatment |        |         |         | K treatment |        |         |         | Normal nutrition supply |         |         |         |
|----------|-------|-------------|---------|---------|---------|-------------|--------|---------|---------|-------------|--------|---------|---------|-------------------------|---------|---------|---------|
|          |       | Min         | Max     | Mean    | Std.dev | Min         | Max    | Mean    | Std.dev | Min         | Max    | Mean    | Std.dev | Min                     | Max     | Mean    | Std.dev |
|          | NRI   | -0.0425     | 0.0240  | -0.0057 | 0.0167  | -0.0505     | 0.0316 | 0.0055  | 0.0175  | -0.0235     | 0.0478 | 0.0073  | 0.0170  | -0.0058                 | 0.0489  | 0.0214  | 0.0187  |
|          | NGI   | -0.0666     | -0.0056 | -0.0339 | 0.0157  | -0.0447     | 0.3578 | 0.1303  | 0.1187  | -0.0903     | 0.0229 | -0.0439 | 0.0242  | -0.0800                 | 0.0064  | -0.0380 | 0.0314  |
|          | NBI   | -0.0021     | 0.3278  | 0.1277  | 0.0924  | -0.0729     | 0.0437 | -0.0294 | 0.0344  | -0.0998     | 0.4214 | 0.1653  | 0.1355  | -0.0846                 | 0.3900  | 0.1427  | 0.1758  |
|          | DGCI  | -0.0687     | 0.0762  | 0.0161  | 0.0245  | -0.9818     | 0.0956 | -0.2047 | 0.2268  | -0.0271     | 0.0950 | 0.0287  | 0.0291  | -0.0090                 | 0.0780  | 0.0258  | 0.0253  |
|          | GRVI  | -0.5019     | 0.1677  | -0.1833 | 0.1411  | -0.0634     | 0.0767 | 0.0244  | 0.0262  | -0.6737     | 0.0355 | -0.2133 | 0.1644  | -0.1635                 | -0.0263 | -0.1077 | 0.0439  |
|          | IKAW  | -0.2495     | 0.0307  | -0.1199 | 0.0807  | -0.2962     | 0.0804 | -0.1252 | 0.1001  | -0.3390     | 0.1279 | -0.1337 | 0.1255  | -0.2876                 | 0.1131  | -0.1028 | 0.1717  |
|          | IPCA  | -0.1730     | 0.0194  | -0.0693 | 0.0478  | -0.1557     | 0.0534 | -0.0601 | 0.0494  | -0.1498     | 0.2089 | -0.0499 | 0.0756  | -0.1257                 | 0.0614  | -0.0370 | 0.0734  |
| P4       | LW    | -0.2914     | 0.2783  | 0.0200  | 0.1123  | -0.1352     | 0.1273 | 0.0164  | 0.0552  | -0.1592     | 0.2350 | -0.0063 | 0.0833  | -0.1549                 | 0.0562  | -0.0190 | 0.0571  |
|          | LL    | -0.0045     | 0.0679  | 0.0013  | 0.0105  | -0.0872     | 0.0720 | -0.0027 | 0.0233  | -0.0039     | 0.0026 | 0.0002  | 0.0010  | -0.0090                 | 0.0256  | 0.0010  | 0.0094  |
|          | LA    | -0.0487     | 0.1274  | -0.0016 | 0.0244  | -0.2139     | 0.1254 | -0.0137 | 0.0565  | -0.0373     | 0.0143 | -0.0015 | 0.0093  | -0.0229                 | 0.0090  | -0.0045 | 0.0103  |
|          | LP    | -0.0089     | 0.0684  | 0.0079  | 0.0116  | -0.0823     | 0.0801 | 0.0045  | 0.0243  | -0.0031     | 0.0329 | 0.0068  | 0.0073  | 0.0000                  | 0.0364  | 0.0087  | 0.0106  |
|          | EC    | -0.0003     | 0.0001  | 0.0000  | 0.0001  | -0.0001     | 0.0002 | 0.0000  | 0.0000  | -0.0002     | 0.0001 | 0.0000  | 0.0001  | -0.0001                 | 0.0000  | 0.0000  | 0.0000  |
|          | RE    | -0.3075     | 0.2406  | -0.0226 | 0.1135  | -0.2165     | 0.0911 | -0.0274 | 0.0552  | -0.2358     | 0.1552 | 0.0045  | 0.0853  | -0.0580                 | 0.1339  | 0.0134  | 0.0524  |
|          | AC    | -0.2029     | 0.1474  | -0.0218 | 0.0780  | -0.1969     | 0.0611 | -0.0248 | 0.0489  | -0.1912     | 0.1141 | 0.0029  | 0.0622  | -0.0735                 | 0.0795  | 0.0031  | 0.0420  |
|          | CI    | -0.2935     | 0.2825  | 0.0187  | 0.1148  | -0.1062     | 0.1308 | 0.0190  | 0.0542  | -0.1554     | 0.2363 | -0.0065 | 0.0834  | -0.1550                 | 0.0561  | -0.0199 | 0.0575  |
|          | FF    | -0.0570     | 0.0214  | -0.0170 | 0.0163  | -0.1083     | 0.0061 | -0.0226 | 0.0258  | -0.0835     | 0.0077 | -0.0151 | 0.0187  | -0.0638                 | 0.0028  | -0.0216 | 0.0197  |
|          | R     | -0.0421     | 0.1058  | 0.0393  | 0.0355  | -0.0914     | 0.2111 | 0.0489  | 0.0520  | -0.0825     | 0.1266 | 0.0283  | 0.0388  | -0.0053                 | 0.0804  | 0.0280  | 0.0290  |
|          | G     | -0.0764     | 0.0532  | 0.0083  | 0.0252  | -0.0535     | 0.0636 | 0.0067  | 0.0248  | -0.1100     | 0.0607 | 0.0025  | 0.0281  | 0.0000                  | 0.0659  | 0.0142  | 0.0200  |
|          | B     | -0.1407     | 0.1172  | 0.0054  | 0.0639  | -0.2734     | 0.2019 | 0.0044  | 0.0943  | -0.1026     | 0.1690 | 0.0052  | 0.0508  | -0.0932                 | 0.1242  | 0.0372  | 0.0629  |
|          | H     | -0.0087     | 0.0133  | 0.0000  | 0.0049  | -0.0187     | 0.0042 | -0.0043 | 0.0046  | -0.0092     | 0.0023 | -0.0031 | 0.0024  | -0.0067                 | 0.0008  | -0.0032 | 0.0024  |
|          | S     | -0.0170     | 0.0236  | 0.0057  | 0.0091  | -0.0079     | 0.0319 | 0.0068  | 0.0097  | -0.0176     | 0.0216 | -0.0012 | 0.0079  | -0.0101                 | 0.0116  | -0.0008 | 0.0093  |
|          | BR    | -0.0440     | 0.0706  | 0.0184  | 0.0258  | -0.0716     | 0.1144 | 0.0194  | 0.0310  | -0.0993     | 0.0883 | 0.0100  | 0.0311  | -0.0062                 | 0.0734  | 0.0187  | 0.0244  |
|          | NRI   | -0.0176     | 0.0533  | 0.0183  | 0.0147  | -0.0044     | 0.0652 | 0.0254  | 0.0182  | -0.0031     | 0.0354 | 0.0154  | 0.0099  | -0.0002                 | 0.0122  | 0.0058  | 0.0042  |
|          | NGI   | -0.0636     | 0.0255  | -0.0127 | 0.0207  | -0.2326     | 0.1237 | -0.0151 | 0.0630  | -0.0503     | 0.0070 | -0.0104 | 0.0122  | -0.0325                 | 0.0151  | -0.0043 | 0.0161  |
|          | NBI   | -0.1369     | 0.0578  | -0.0156 | 0.0482  | -0.0942     | 0.0566 | -0.0208 | 0.0353  | -0.0868     | 0.0597 | -0.0077 | 0.0294  | -0.0822                 | 0.0653  | -0.0085 | 0.0446  |
|          | DGCI  | -0.0444     | 0.0714  | 0.0186  | 0.0261  | -0.0725     | 0.1163 | 0.0199  | 0.0315  | -0.1006     | 0.0894 | 0.0102  | 0.0315  | -0.0064                 | 0.0742  | 0.0190  | 0.0246  |
|          | GRVI  | -0.3463     | -0.0178 | -0.1552 | 0.1191  | -1.4378     | 0.0529 | -0.2923 | 0.3539  | -0.7453     | 0.0004 | -0.1926 | 0.2163  | -0.3603                 | 0.0526  | -0.0596 | 0.1615  |
|          | IKAW  | -0.0935     | 0.1888  | 0.0369  | 0.0659  | -0.2104     | 0.2391 | 0.0485  | 0.0789  | -0.0607     | 0.1199 | 0.0294  | 0.0434  | -0.1192                 | 0.0688  | 0.0033  | 0.0653  |
|          | IPCA  | -0.1138     | 0.1662  | 0.0428  | 0.0551  | -0.1906     | 0.1869 | 0.0278  | 0.0702  | -0.0720     | 0.1202 | 0.0091  | 0.0331  | -0.0432                 | 0.0496  | 0.0140  | 0.0298  |
| P5       | LW    | -0.2923     | 0.1549  | -0.0098 | 0.0966  | -0.1717     | 0.1940 | 0.0082  | 0.0715  | -0.1263     | 0.2735 | 0.0222  | 0.0791  | -0.0637                 | 0.2670  | 0.0249  | 0.0938  |
|          | LL    | -0.0231     | 0.0007  | -0.0011 | 0.0037  | -0.0322     | 0.1092 | 0.0035  | 0.0221  | -0.0300     | 0.0050 | -0.0019 | 0.0059  | -0.0023                 | 0.0090  | 0.0005  | 0.0031  |

| Data set | Index | N treatment |         |         |         | P treatment |        |         |         | K treatment |        |         |         | Normal nutrition supply |         |         |         |
|----------|-------|-------------|---------|---------|---------|-------------|--------|---------|---------|-------------|--------|---------|---------|-------------------------|---------|---------|---------|
|          |       | Min         | Max     | Mean    | Std.dev | Min         | Max    | Mean    | Std.dev | Min         | Max    | Mean    | Std.dev | Min                     | Max     | Mean    | Std.dev |
|          | LA    | -0.2827     | 0.0276  | -0.0268 | 0.0694  | -0.0626     | 0.3130 | -0.0022 | 0.0610  | -0.0743     | 0.0125 | -0.0070 | 0.0144  | -0.0388                 | 0.0405  | -0.0015 | 0.0189  |
|          | LP    | -0.0328     | 0.0045  | -0.0047 | 0.0076  | -0.0453     | 0.1028 | 0.0019  | 0.0237  | -0.0294     | 0.0130 | -0.0033 | 0.0088  | -0.0082                 | 0.0023  | -0.0023 | 0.0034  |
|          | EC    | -0.0001     | 0.0003  | 0.0000  | 0.0001  | -0.0002     | 0.0001 | 0.0000  | 0.0001  | -0.0003     | 0.0001 | 0.0000  | 0.0001  | -0.0002                 | 0.0001  | 0.0000  | 0.0001  |
|          | RE    | -0.2334     | 0.1967  | -0.0162 | 0.0919  | -0.1510     | 0.1925 | -0.0139 | 0.0701  | -0.2891     | 0.1018 | -0.0273 | 0.0774  | -0.2634                 | 0.0609  | -0.0270 | 0.0916  |
|          | AC    | -0.1832     | 0.1885  | -0.0081 | 0.0694  | -0.1522     | 0.1788 | -0.0108 | 0.0616  | -0.2258     | 0.0855 | -0.0193 | 0.0560  | -0.1593                 | 0.0484  | -0.0132 | 0.0597  |
|          | CI    | -0.2914     | 0.1554  | -0.0087 | 0.0963  | -0.1721     | 0.1325 | 0.0047  | 0.0697  | -0.1276     | 0.2764 | 0.0241  | 0.0803  | -0.0639                 | 0.2693  | 0.0245  | 0.0947  |
|          | FF    | -0.2729     | 0.0623  | -0.0177 | 0.0702  | -0.0625     | 0.1074 | -0.0060 | 0.0361  | -0.0720     | 0.0662 | -0.0005 | 0.0228  | -0.0327                 | 0.0423  | 0.0030  | 0.0184  |
|          | R     | -0.0603     | 0.1594  | 0.0192  | 0.0477  | -0.0983     | 0.1597 | 0.0432  | 0.0631  | -0.2213     | 0.1491 | 0.0315  | 0.0623  | -0.0505                 | 0.1119  | 0.0357  | 0.0482  |
|          | G     | -0.0868     | 0.0360  | -0.0119 | 0.0248  | -0.0609     | 0.0431 | -0.0053 | 0.0252  | -0.0906     | 0.1008 | -0.0035 | 0.0311  | -0.0572                 | 0.0824  | 0.0141  | 0.0400  |
|          | B     | -0.0119     | 0.2304  | 0.0737  | 0.0625  | -0.1555     | 0.3242 | 0.0930  | 0.0952  | -0.2206     | 0.2826 | 0.0697  | 0.0815  | -0.0087                 | 0.3407  | 0.0770  | 0.1047  |
|          | H     | -0.0207     | 0.0080  | -0.0036 | 0.0065  | -0.0217     | 0.0114 | -0.0050 | 0.0077  | -0.0262     | 0.0098 | -0.0038 | 0.0063  | -0.0069                 | 0.0015  | -0.0033 | 0.0029  |
|          | S     | -0.0182     | 0.0173  | -0.0008 | 0.0081  | -0.0227     | 0.0202 | -0.0013 | 0.0103  | -0.0573     | 0.0319 | -0.0016 | 0.0144  | -0.0088                 | 0.0219  | 0.0013  | 0.0099  |
|          | BR    | -0.0655     | 0.0717  | 0.0035  | 0.0272  | -0.0536     | 0.0814 | 0.0146  | 0.0323  | -0.1381     | 0.1019 | 0.0106  | 0.0390  | -0.0513                 | 0.0557  | 0.0051  | 0.0277  |
|          | NRI   | -0.0428     | 0.0479  | 0.0020  | 0.0225  | -0.0395     | 0.0609 | 0.0117  | 0.0261  | -0.0534     | 0.0533 | 0.0080  | 0.0215  | -0.0090                 | 0.0067  | -0.0010 | 0.0056  |
|          | NGI   | -0.1063     | 0.0001  | -0.0291 | 0.0246  | -0.1065     | 0.2630 | 0.0375  | 0.0732  | -0.0884     | 0.0774 | -0.0270 | 0.0293  | -0.0754                 | -0.0015 | -0.0170 | 0.0221  |
|          | NBI   | -0.0163     | 0.1785  | 0.0564  | 0.0497  | -0.0939     | 0.0981 | -0.0127 | 0.0629  | -0.0526     | 0.2373 | 0.0462  | 0.0473  | 0.0000                  | 0.2437  | 0.0468  | 0.0723  |
|          | DGCI  | -0.0662     | 0.0726  | 0.0036  | 0.0276  | -0.0542     | 0.0828 | 0.0149  | 0.0328  | -0.1404     | 0.1032 | 0.0108  | 0.0396  | -0.0518                 | 0.0563  | 0.0053  | 0.0281  |
|          | GRVI  | -0.5835     | -0.0312 | -0.2144 | 0.1945  | -1.9865     | 0.2753 | -0.3183 | 0.4852  | -0.8728     | 0.0610 | -0.1863 | 0.2028  | -0.2635                 | -0.0028 | -0.0555 | 0.0940  |
|          | IKAW  | -0.2119     | 0.0553  | -0.0697 | 0.0721  | -0.2386     | 0.2058 | -0.0553 | 0.0795  | -0.2293     | 0.0391 | -0.0525 | 0.0625  | -0.2296                 | 0.0402  | -0.0920 | 0.0768  |
|          | IPCA  | -0.1961     | 0.0508  | -0.0597 | 0.0653  | -0.2017     | 0.1702 | -0.0452 | 0.0705  | -0.1781     | 0.0273 | -0.0493 | 0.0488  | -0.1531                 | 0.0107  | -0.0594 | 0.0520  |
| P6       | LW    | -0.1377     | 0.1507  | 0.0038  | 0.0682  | -0.2292     | 0.3876 | 0.0174  | 0.0973  | -0.3372     | 0.1703 | -0.0170 | 0.0933  | -0.2503                 | 0.1697  | 0.0254  | 0.1163  |
|          | LL    | -0.0208     | 0.0106  | -0.0022 | 0.0060  | -0.1116     | 0.0072 | -0.0071 | 0.0211  | -1.6438     | 0.0022 | -0.0445 | 0.2596  | -0.0054                 | 0.0022  | -0.0006 | 0.0020  |
|          | LA    | -0.0780     | 0.0031  | -0.0112 | 0.0147  | -0.4172     | 0.0325 | -0.0304 | 0.0883  | -0.0549     | 0.0175 | -0.0139 | 0.0177  | -0.0835                 | 0.0015  | -0.0192 | 0.0255  |
|          | LP    | -0.0189     | 0.0317  | 0.0037  | 0.0107  | -0.1066     | 0.0243 | -0.0024 | 0.0207  | -1.3853     | 0.0192 | -0.0338 | 0.2195  | -0.0013                 | 0.0120  | 0.0037  | 0.0040  |
|          | EC    | -0.0001     | 0.0001  | 0.0000  | 0.0000  | -0.0009     | 0.0003 | 0.0000  | 0.0002  | -0.0041     | 0.0001 | -0.0001 | 0.0007  | -0.0001                 | 0.0001  | 0.0000  | 0.0001  |
|          | RE    | -0.1684     | 0.1453  | -0.0128 | 0.0715  | -0.7657     | 0.2361 | -0.0407 | 0.1522  | -0.2056     | 0.1642 | -0.0056 | 0.0780  | -0.1861                 | 0.2448  | -0.0440 | 0.1228  |
|          | AC    | -0.1159     | 0.0710  | -0.0034 | 0.0424  | -0.7561     | 0.1995 | -0.0326 | 0.1439  | -0.1711     | 0.1700 | -0.0002 | 0.0566  | -0.0485                 | 0.1334  | -0.0061 | 0.0553  |
|          | CI    | -0.1349     | 0.1513  | 0.0059  | 0.0692  | -0.2300     | 0.4266 | 0.0245  | 0.1060  | -0.2026     | 1.3066 | 0.0276  | 0.2223  | -0.2525                 | 0.1700  | 0.0260  | 0.1172  |
|          | FF    | -0.0855     | 0.0277  | -0.0203 | 0.0296  | -0.3929     | 0.0396 | -0.0255 | 0.0678  | -0.0739     | 0.6326 | 0.0004  | 0.1060  | -0.0871                 | 0.0028  | -0.0266 | 0.0275  |
|          | R     | -0.0484     | 0.1546  | 0.0501  | 0.0461  | -0.1930     | 0.2648 | 0.0508  | 0.0670  | -0.1243     | 0.2744 | 0.0379  | 0.0602  | -0.0703                 | 0.0653  | -0.0029 | 0.0428  |
|          | G     | -0.0801     | 0.1026  | 0.0261  | 0.0387  | -0.0815     | 0.0900 | 0.0162  | 0.0355  | -0.0844     | 0.1058 | 0.0066  | 0.0317  | -0.0745                 | 0.0679  | -0.0130 | 0.0394  |

| Data set | Index | N treatment |         |         |         | P treatment |         |         |         | K treatment |        |         |         | Normal nutrition supply |         |         |         |
|----------|-------|-------------|---------|---------|---------|-------------|---------|---------|---------|-------------|--------|---------|---------|-------------------------|---------|---------|---------|
|          |       | Min         | Max     | Mean    | Std.dev | Min         | Max     | Mean    | Std.dev | Min         | Max    | Mean    | Std.dev | Min                     | Max     | Mean    | Std.dev |
|          | B     | -0.1798     | 0.1526  | 0.0133  | 0.0850  | -0.5249     | 0.2650  | 0.0098  | 0.1139  | -0.2901     | 0.2625 | 0.0127  | 0.0835  | -0.1027                 | 0.0278  | -0.0295 | 0.0500  |
|          | H     | -0.0132     | 0.0056  | -0.0022 | 0.0049  | -0.0249     | 0.0130  | -0.0055 | 0.0074  | -0.0273     | 0.0061 | -0.0060 | 0.0078  | -0.0119                 | 0.0049  | -0.0029 | 0.0053  |
|          | S     | -0.0101     | 0.0169  | 0.0028  | 0.0063  | -0.0190     | 0.0272  | 0.0005  | 0.0094  | -0.0401     | 0.0361 | -0.0013 | 0.0139  | -0.0185                 | 0.0095  | 0.0006  | 0.0085  |
|          | BR    | -0.0752     | 0.1201  | 0.0328  | 0.0414  | -0.1311     | 0.1451  | 0.0274  | 0.0455  | -0.1090     | 0.1686 | 0.0165  | 0.0423  | -0.0363                 | 0.0773  | 0.0220  | 0.0357  |
|          | NRI   | -0.0025     | 0.0496  | 0.0174  | 0.0130  | -0.0223     | 0.0775  | 0.0212  | 0.0178  | -0.0193     | 0.0693 | 0.0182  | 0.0144  | 0.0032                  | 0.0227  | 0.0116  | 0.0055  |
|          | NGI   | -0.0537     | 0.0200  | -0.0066 | 0.0183  | -0.0542     | 0.1049  | 0.0084  | 0.0278  | -0.0993     | 0.0541 | -0.0132 | 0.0248  | -0.0146                 | 0.0172  | -0.0036 | 0.0105  |
|          | NBI   | -0.1234     | 0.0485  | -0.0194 | 0.0427  | -0.3385     | 0.0258  | -0.0416 | 0.0569  | -0.1516     | 0.0694 | -0.0071 | 0.0452  | -0.0555                 | 0.0290  | -0.0088 | 0.0267  |
|          | DGCI  | -0.0761     | 0.1217  | 0.0333  | 0.0419  | -0.1329     | 0.1474  | 0.0278  | 0.0461  | -0.1103     | 0.1713 | 0.0168  | 0.0429  | -0.0368                 | 0.0785  | 0.0224  | 0.0362  |
|          | GRVI  | -1.0567     | -0.1028 | -0.4452 | 0.2958  | -0.4682     | 2.4381  | 0.1828  | 1.1136  | -1.2525     | 0.0645 | -0.2710 | 0.3281  | -0.0851                 | 0.1298  | -0.0211 | 0.0698  |
|          | IKAW  | -0.0341     | 0.2378  | 0.0520  | 0.0664  | -0.1015     | 0.2745  | 0.0492  | 0.0689  | -0.1320     | 0.1768 | 0.0361  | 0.0712  | -0.1083                 | 0.0983  | 0.0127  | 0.0646  |
|          | IPCA  | -0.0212     | 0.1936  | 0.0721  | 0.0505  | -0.0912     | 0.1712  | 0.0637  | 0.0682  | -0.1303     | 0.1623 | 0.0324  | 0.0740  | -0.0336                 | 0.1289  | 0.0302  | 0.0501  |
| P7       | LW    | -0.2020     | 0.2626  | 0.0011  | 0.0857  | -0.1806     | 0.2291  | 0.0110  | 0.0865  | -0.1805     | 0.2906 | 0.0117  | 0.1060  | -0.1578                 | 0.0597  | -0.0335 | 0.0801  |
|          | LL    | -1.3601     | 0.0133  | -0.0744 | 0.2918  | -0.0669     | 0.0091  | -0.0026 | 0.0113  | -0.0521     | 1.6283 | 0.0426  | 0.2609  | -0.0001                 | 0.0067  | 0.0013  | 0.0027  |
|          | LA    | -0.0806     | 0.0179  | -0.0110 | 0.0187  | -0.1584     | 0.0254  | -0.0188 | 0.0288  | -0.1511     | 0.2154 | -0.0100 | 0.0473  | -0.0052                 | 0.0199  | 0.0018  | 0.0092  |
|          | LP    | -1.3213     | 0.0173  | -0.0745 | 0.2882  | -0.0793     | 0.1201  | 0.0007  | 0.0237  | -0.0466     | 1.3568 | 0.0388  | 0.2172  | -0.0067                 | 0.0016  | -0.0024 | 0.0032  |
|          | EC    | -0.0036     | 0.0001  | -0.0001 | 0.0006  | -0.0002     | 0.0007  | 0.0000  | 0.0001  | -0.0002     | 0.0041 | 0.0001  | 0.0007  | -0.0001                 | 0.0001  | 0.0000  | 0.0001  |
|          | RE    | -0.2803     | 0.2012  | -0.0119 | 0.0868  | -0.2832     | 0.1362  | -0.0273 | 0.0946  | -0.3896     | 0.2250 | -0.0097 | 0.1178  | -0.0628                 | 0.1604  | 0.0315  | 0.0818  |
|          | AC    | -0.1067     | 0.1558  | -0.0042 | 0.0534  | -0.2235     | 0.1728  | -0.0191 | 0.0826  | -0.2724     | 0.1602 | -0.0131 | 0.0834  | -0.0722                 | 0.0614  | 0.0112  | 0.0540  |
|          | CI    | -0.2026     | 0.4591  | 0.0223  | 0.1196  | -0.1898     | 0.2305  | 0.0136  | 0.0869  | -1.3580     | 0.3427 | -0.0309 | 0.2408  | -0.1584                 | 0.0530  | -0.0347 | 0.0788  |
|          | FF    | -0.0485     | 0.3885  | 0.0092  | 0.0724  | -0.3986     | 0.0805  | -0.0202 | 0.0656  | -0.5900     | 0.1123 | -0.0330 | 0.1010  | -0.0121                 | 0.0019  | -0.0027 | 0.0051  |
|          | R     | -0.0626     | 0.0639  | 0.0061  | 0.0291  | -0.0745     | 0.2059  | 0.0238  | 0.0511  | -0.0272     | 0.1392 | 0.0465  | 0.0421  | 0.0167                  | 0.1132  | 0.0629  | 0.0459  |
|          | G     | -0.0765     | 0.0585  | -0.0060 | 0.0332  | -0.0714     | 0.0652  | 0.0051  | 0.0280  | -0.0318     | 0.0810 | 0.0162  | 0.0268  | 0.0067                  | 0.0927  | 0.0445  | 0.0405  |
|          | B     | -0.0952     | 0.1274  | 0.0224  | 0.0460  | -0.1134     | 0.3765  | 0.0458  | 0.0678  | -0.0896     | 0.1984 | 0.0414  | 0.0584  | 0.0540                  | 0.1937  | 0.1141  | 0.0610  |
|          | H     | -0.0076     | 0.0122  | -0.0007 | 0.0038  | -0.0176     | 0.0237  | 0.0006  | 0.0079  | -0.0248     | 0.0189 | -0.0032 | 0.0085  | -0.0093                 | -0.0016 | -0.0055 | 0.0029  |
|          | S     | -0.0208     | 0.0171  | -0.0005 | 0.0063  | -0.0104     | 0.0243  | 0.0032  | 0.0073  | -0.0235     | 0.0257 | 0.0015  | 0.0100  | -0.0114                 | 0.0188  | 0.0015  | 0.0120  |
|          | BR    | -0.0708     | 0.0609  | -0.0002 | 0.0296  | -0.0640     | 0.1205  | 0.0136  | 0.0335  | -0.0292     | 0.1071 | 0.0274  | 0.0293  | -0.0570                 | 0.0072  | -0.0125 | 0.0234  |
|          | NRI   | -0.0240     | 0.0342  | 0.0014  | 0.0130  | -0.0425     | 0.0421  | 0.0029  | 0.0186  | -0.0130     | 0.0528 | 0.0131  | 0.0143  | 0.0010                  | 0.0150  | 0.0067  | 0.0046  |
|          | NGI   | -0.0640     | 0.0067  | -0.0107 | 0.0155  | -0.0986     | 0.0701  | 0.0124  | 0.0312  | -0.0817     | 0.0243 | -0.0171 | 0.0235  | -0.0145                 | 0.0038  | -0.0027 | 0.0072  |
|          | NBI   | -0.0255     | 0.0909  | 0.0177  | 0.0242  | -0.0676     | 0.2127  | -0.0032 | 0.0408  | -0.0654     | 0.0891 | 0.0080  | 0.0299  | -0.0259                 | 0.0145  | -0.0055 | 0.0177  |
|          | DGCI  | -0.0718     | 0.0616  | -0.0002 | 0.0300  | -0.0647     | 0.1223  | 0.0138  | 0.0339  | -0.0295     | 0.1084 | 0.0278  | 0.0297  | -0.0577                 | 0.0073  | -0.0126 | 0.0238  |
|          | GRVI  | -0.4711     | -0.0162 | -0.1595 | 0.2125  | -0.3597     | -0.0556 | -0.1809 | 0.1179  | -0.5123     | 0.9519 | -0.0535 | 0.3372  | -0.0637                 | 0.0464  | -0.0078 | 0.0451  |

| Data set | Index   | N treatment |         |         |         | P treatment |         |         |         | K treatment |         |         |         | Normal nutrition supply |         |         |         |
|----------|---------|-------------|---------|---------|---------|-------------|---------|---------|---------|-------------|---------|---------|---------|-------------------------|---------|---------|---------|
|          |         | Min         | Max     | Mean    | Std.dev | Min         | Max     | Mean    | Std.dev | Min         | Max     | Mean    | Std.dev | Min                     | Max     | Mean    | Std.dev |
|          | IKAW    | -0.1109     | 0.0411  | -0.0204 | 0.0375  | -0.1912     | 0.0874  | -0.0310 | 0.0504  | -0.0613     | 0.0858  | 0.0074  | 0.0350  | -0.0044                 | 0.1283  | 0.0474  | 0.0451  |
|          | IPCA    | -0.1265     | 0.0476  | -0.0158 | 0.0392  | -0.1928     | 0.0833  | -0.0145 | 0.0588  | -0.0487     | 0.1410  | 0.0259  | 0.0456  | -0.0965                 | 0.0274  | -0.0126 | 0.0443  |
| P1'      | LW      | -0.1019     | 0.0954  | 0.0082  | 0.0415  | -0.0762     | 0.1315  | -0.0004 | 0.0428  | -0.0392     | 0.1226  | 0.0082  | 0.0346  | -0.1035                 | 0.0881  | -0.0089 | 0.0503  |
|          | LL      | -0.0091     | 0.0203  | 0.0000  | 0.0045  | -0.0213     | 0.0112  | -0.0001 | 0.0041  | -0.0140     | 0.0109  | -0.0005 | 0.0029  | -0.0013                 | 0.0281  | 0.0024  | 0.0091  |
|          | LA      | -0.1031     | 0.0624  | 0.0010  | 0.0227  | -0.0624     | 0.0408  | -0.0032 | 0.0151  | -0.0404     | 0.0094  | -0.0028 | 0.0081  | -0.0039                 | 0.0558  | 0.0051  | 0.0181  |
|          | LP      | -0.0106     | 0.0214  | 0.0011  | 0.0056  | -0.0170     | 0.0134  | 0.0028  | 0.0043  | -0.0127     | 0.0122  | 0.0006  | 0.0039  | -0.0020                 | 0.0276  | 0.0054  | 0.0087  |
|          | EC      | -0.0001     | 0.0000  | 0.0000  | 0.0000  | -0.0001     | 0.0001  | 0.0000  | 0.0000  | -0.0001     | 0.0000  | 0.0000  | 0.0000  | 0.0000                  | 0.0001  | 0.0000  | 0.0000  |
|          | RE      | -0.1082     | 0.0799  | -0.0073 | 0.0406  | -0.1471     | 0.0752  | -0.0027 | 0.0431  | -0.1276     | 0.0375  | -0.0105 | 0.0361  | -0.0863                 | 0.1018  | 0.0111  | 0.0515  |
|          | AC      | -0.0627     | 0.0720  | -0.0026 | 0.0283  | -0.0599     | 0.0606  | -0.0002 | 0.0261  | -0.0823     | 0.0571  | -0.0051 | 0.0233  | -0.0042                 | 0.0753  | 0.0216  | 0.0262  |
|          | CI      | -0.0945     | 0.0964  | 0.0082  | 0.0405  | -0.0764     | 0.1202  | -0.0004 | 0.0419  | -0.0383     | 0.1232  | 0.0087  | 0.0343  | -0.1034                 | 0.0887  | -0.0113 | 0.0524  |
|          | FF      | -0.1024     | 0.0462  | -0.0012 | 0.0203  | -0.0465     | 0.0401  | -0.0088 | 0.0138  | -0.0225     | 0.0112  | -0.0040 | 0.0079  | -0.0206                 | 0.0097  | -0.0054 | 0.0090  |
|          | R       | -0.0060     | 0.1578  | 0.0563  | 0.0416  | -0.0207     | 0.1238  | 0.0384  | 0.0342  | -0.0263     | 0.0754  | 0.0327  | 0.0237  | -0.0488                 | 0.0505  | 0.0043  | 0.0277  |
|          | G       | -0.0280     | 0.0484  | 0.0130  | 0.0138  | -0.0339     | 0.0469  | 0.0111  | 0.0161  | -0.0273     | 0.0280  | 0.0070  | 0.0120  | -0.0515                 | 0.0173  | -0.0025 | 0.0194  |
|          | B       | -0.0424     | 0.1820  | 0.0476  | 0.0534  | -0.1027     | 0.1599  | 0.0156  | 0.0545  | -0.0648     | 0.1417  | 0.0207  | 0.0509  | -0.0787                 | 0.1349  | -0.0068 | 0.0591  |
|          | H       | -0.0134     | 0.0017  | -0.0031 | 0.0032  | -0.0121     | 0.0017  | -0.0023 | 0.0023  | -0.0033     | 0.0012  | -0.0011 | 0.0010  | -0.0034                 | -0.0003 | -0.0012 | 0.0010  |
|          | S       | -0.0117     | 0.0159  | -0.0015 | 0.0046  | -0.0102     | 0.0074  | -0.0011 | 0.0043  | -0.0131     | 0.0078  | -0.0008 | 0.0040  | -0.0068                 | 0.0030  | -0.0013 | 0.0032  |
|          | BR      | -0.0091     | 0.0769  | 0.0257  | 0.0193  | -0.0318     | 0.0643  | 0.0177  | 0.0195  | -0.0280     | 0.0384  | 0.0133  | 0.0133  | -0.0513                 | 0.0305  | 0.0037  | 0.0235  |
|          | NRI     | -0.0096     | 0.0654  | 0.0228  | 0.0196  | 0.0006      | 0.0501  | 0.0175  | 0.0125  | -0.0023     | 0.0397  | 0.0151  | 0.0108  | -0.0145                 | 0.0125  | 0.0005  | 0.0076  |
|          | NGI     | -0.0570     | 0.0024  | -0.0205 | 0.0173  | -0.1177     | 0.0914  | -0.0044 | 0.0385  | -0.0363     | 0.0040  | -0.0106 | 0.0098  | -0.0145                 | 0.0094  | -0.0006 | 0.0067  |
|          | NBI     | -0.0693     | 0.1397  | 0.0141  | 0.0426  | -0.0591     | 0.0217  | -0.0108 | 0.0151  | -0.0957     | 0.1015  | 0.0032  | 0.0441  | -0.0349                 | 0.0492  | 0.0009  | 0.0324  |
| DGCI     | -0.0092 | 0.0783      | 0.0261  | 0.0196  | -0.0323 | 0.0655      | 0.0181  | 0.0198  | -0.0285 | 0.0392      | 0.0136  | 0.0135  | -0.0521 | 0.0311                  | 0.0038  | 0.0239  |         |
| GRVI     | -0.4760 | 0.0001      | -0.1126 | 0.1137  | -0.2155 | 0.0058      | -0.0540 | 0.0479  | -0.6483 | 0.0037      | -0.0663 | 0.1101  | -0.0391 | 0.0249                  | -0.0036 | 0.0195  |         |
| IKAW     | -0.1473 | 0.0756      | 0.0056  | 0.0448  | -0.0457 | 0.1008      | 0.0202  | 0.0309  | -0.1086 | 0.0655      | 0.0028  | 0.0422  | -0.0591 | 0.0356                  | 0.0021  | 0.0299  |         |
| IPCA     | -0.0879 | 0.0666      | 0.0065  | 0.0288  | -0.0206 | 0.0504      | 0.0128  | 0.0170  | -0.1246 | 0.0375      | -0.0012 | 0.0330  | -0.0458 | 0.0343                  | 0.0051  | 0.0211  |         |
| P2'      | LW      | -0.0642     | 0.1218  | 0.0074  | 0.0405  | -0.1399     | 0.0981  | -0.0041 | 0.0467  | -0.0666     | 0.0597  | 0.0017  | 0.0289  | -0.0780                 | 0.0550  | -0.0085 | 0.0352  |
|          | LL      | -0.0022     | 0.0101  | 0.0007  | 0.0025  | -0.0436     | 0.0211  | -0.0014 | 0.0093  | -0.0007     | 0.0033  | 0.0002  | 0.0007  | -0.0173                 | 0.0015  | -0.0022 | 0.0062  |
|          | LA      | -0.0247     | 0.0125  | -0.0019 | 0.0070  | -0.1054     | 0.0636  | -0.0051 | 0.0250  | -0.0194     | 0.0099  | -0.0024 | 0.0063  | -0.0338                 | 0.0040  | -0.0027 | 0.0112  |
|          | LP      | -0.0111     | 0.0094  | -0.0029 | 0.0042  | -0.0487     | 0.0156  | -0.0054 | 0.0104  | -0.0102     | 0.0011  | -0.0034 | 0.0026  | -0.0191                 | -0.0004 | -0.0066 | 0.0055  |
|          | EC      | -0.0001     | 0.0001  | 0.0000  | 0.0000  | -0.0001     | 0.0001  | 0.0000  | 0.0000  | -0.0001     | 0.0001  | 0.0000  | 0.0000  | 0.0000                  | 0.0000  | 0.0000  | 0.0000  |
|          | RE      | -0.1407     | 0.0666  | -0.0101 | 0.0421  | -0.0982     | 0.0918  | 0.0005  | 0.0424  | -0.0670     | 0.0616  | -0.0043 | 0.0286  | -0.0535                 | 0.0797  | 0.0080  | 0.0358  |
|          | AC      | -0.1029     | 0.0596  | -0.0098 | 0.0318  | -0.0958     | 0.0667  | -0.0060 | 0.0319  | -0.0813     | 0.0276  | -0.0070 | 0.0233  | -0.0325                 | 0.0176  | -0.0078 | 0.0156  |

| Data set | Index | N treatment |         |         |         | P treatment |        |         |         | K treatment |        |         |         | Normal nutrition supply |         |         |         |
|----------|-------|-------------|---------|---------|---------|-------------|--------|---------|---------|-------------|--------|---------|---------|-------------------------|---------|---------|---------|
|          |       | Min         | Max     | Mean    | Std.dev | Min         | Max    | Mean    | Std.dev | Min         | Max    | Mean    | Std.dev | Min                     | Max     | Mean    | Std.dev |
|          | CI    | -0.0645     | 0.1190  | 0.0067  | 0.0407  | -0.1035     | 0.0984 | -0.0027 | 0.0429  | -0.0671     | 0.0602 | 0.0015  | 0.0289  | -0.0787                 | 0.0554  | -0.0062 | 0.0362  |
|          | FF    | -0.0349     | 0.0192  | 0.0039  | 0.0104  | -0.0222     | 0.0324 | 0.0058  | 0.0098  | -0.0166     | 0.0260 | 0.0043  | 0.0092  | 0.0021                  | 0.0235  | 0.0104  | 0.0079  |
|          | R     | -0.0520     | 0.0750  | 0.0324  | 0.0207  | -0.0388     | 0.1339 | 0.0453  | 0.0289  | 0.0023      | 0.1118 | 0.0463  | 0.0258  | 0.0023                  | 0.0759  | 0.0419  | 0.0223  |
|          | G     | -0.0511     | 0.0297  | 0.0041  | 0.0134  | -0.0236     | 0.0438 | 0.0051  | 0.0127  | -0.0215     | 0.0398 | 0.0084  | 0.0134  | -0.0089                 | 0.0431  | 0.0092  | 0.0146  |
|          | B     | -0.0226     | 0.2177  | 0.0930  | 0.0560  | -0.0274     | 0.2256 | 0.0974  | 0.0676  | -0.0533     | 0.2343 | 0.1147  | 0.0748  | -0.0110                 | 0.2237  | 0.0940  | 0.0859  |
|          | H     | -0.0067     | 0.0020  | -0.0014 | 0.0018  | -0.0090     | 0.0034 | -0.0025 | 0.0023  | -0.0060     | 0.0008 | -0.0017 | 0.0016  | -0.0033                 | 0.0010  | -0.0014 | 0.0015  |
|          | S     | -0.0190     | 0.0046  | -0.0042 | 0.0056  | -0.0161     | 0.0065 | -0.0054 | 0.0062  | -0.0189     | 0.0056 | -0.0066 | 0.0071  | -0.0200                 | 0.0061  | -0.0049 | 0.0095  |
|          | BR    | -0.0490     | 0.0441  | 0.0163  | 0.0145  | -0.0235     | 0.0673 | 0.0193  | 0.0155  | -0.0122     | 0.0636 | 0.0217  | 0.0166  | -0.0002                 | 0.0463  | 0.0192  | 0.0136  |
|          | NRI   | -0.0117     | 0.0189  | 0.0039  | 0.0080  | -0.0245     | 0.0353 | 0.0128  | 0.0117  | -0.0037     | 0.0270 | 0.0112  | 0.0079  | -0.0061                 | 0.0325  | 0.0128  | 0.0115  |
|          | NGI   | -0.0523     | -0.0002 | -0.0244 | 0.0125  | -0.0292     | 0.1694 | 0.0590  | 0.0629  | -0.0654     | 0.0124 | -0.0267 | 0.0138  | -0.0362                 | 0.0003  | -0.0194 | 0.0132  |
|          | NBI   | 0.0025      | 0.1673  | 0.0646  | 0.0472  | -0.0685     | 0.0309 | -0.0216 | 0.0241  | -0.0520     | 0.1854 | 0.0796  | 0.0649  | -0.0472                 | 0.1692  | 0.0547  | 0.0735  |
|          | DGCI  | -0.0494     | 0.0446  | 0.0164  | 0.0147  | -0.0240     | 0.0683 | 0.0196  | 0.0158  | -0.0126     | 0.0645 | 0.0220  | 0.0168  | -0.0003                 | 0.0471  | 0.0195  | 0.0139  |
|          | GRVI  | -0.2869     | -0.0889 | -0.1885 | 0.0595  | -0.8040     | 0.0404 | -0.2360 | 0.2027  | -0.2962     | 0.0213 | -0.1626 | 0.0855  | -0.0900                 | -0.0120 | -0.0579 | 0.0257  |
|          | IKAW  | -0.1260     | 0.0189  | -0.0542 | 0.0397  | -0.1857     | 0.0610 | -0.0452 | 0.0561  | -0.1305     | 0.0622 | -0.0517 | 0.0575  | -0.2034                 | 0.0738  | -0.0461 | 0.0876  |
|          | IPCA  | -0.1120     | 0.0137  | -0.0270 | 0.0230  | -0.1417     | 0.0248 | -0.0274 | 0.0334  | -0.0730     | 0.1069 | -0.0202 | 0.0391  | -0.0594                 | 0.0690  | -0.0105 | 0.0385  |
|          | LW    | -0.1299     | 0.1272  | 0.0088  | 0.0505  | -0.0905     | 0.2179 | 0.0155  | 0.0537  | -0.1503     | 0.1162 | 0.0012  | 0.0471  | -0.0875                 | 0.0734  | 0.0067  | 0.0526  |
|          | LL    | -0.0120     | 0.0015  | -0.0004 | 0.0020  | -0.0198     | 0.0434 | 0.0007  | 0.0096  | -0.8221     | 0.0006 | -0.0221 | 0.1299  | -0.0004                 | 0.0123  | 0.0012  | 0.0039  |
| P3'      | LA    | -0.1264     | 0.0104  | -0.0102 | 0.0263  | -0.2309     | 0.0816 | -0.0114 | 0.0420  | -0.0646     | 0.0035 | -0.0074 | 0.0124  | -0.0299                 | 0.0088  | -0.0037 | 0.0103  |
|          | LP    | -0.0087     | 0.0046  | 0.0001  | 0.0030  | -0.0139     | 0.0467 | 0.0012  | 0.0098  | -0.6861     | 0.0059 | -0.0173 | 0.1086  | -0.0014                 | 0.0141  | 0.0027  | 0.0044  |
|          | EC    | -0.0001     | 0.0001  | 0.0000  | 0.0000  | -0.0005     | 0.0001 | 0.0000  | 0.0001  | -0.0021     | 0.0001 | -0.0001 | 0.0003  | -0.0001                 | 0.0000  | 0.0000  | 0.0000  |
|          | RE    | -0.1707     | 0.0866  | -0.0186 | 0.0573  | -0.4291     | 0.0465 | -0.0276 | 0.0745  | -0.1150     | 0.0799 | -0.0132 | 0.0410  | -0.0805                 | 0.0572  | -0.0117 | 0.0491  |
|          | AC    | -0.1244     | 0.0758  | -0.0142 | 0.0411  | -0.4314     | 0.0474 | -0.0225 | 0.0723  | -0.0811     | 0.0693 | -0.0082 | 0.0291  | -0.0462                 | 0.0420  | -0.0050 | 0.0262  |
|          | CI    | -0.1314     | 0.1268  | 0.0092  | 0.0509  | -0.0908     | 0.2377 | 0.0149  | 0.0540  | -0.0897     | 0.6718 | 0.0234  | 0.1131  | -0.0879                 | 0.0735  | 0.0055  | 0.0532  |
|          | FF    | -0.1287     | 0.0099  | -0.0104 | 0.0268  | -0.2233     | 0.0063 | -0.0139 | 0.0351  | -0.0729     | 0.3006 | 0.0005  | 0.0508  | -0.0346                 | 0.0040  | -0.0091 | 0.0123  |
|          | R     | -0.0264     | 0.1238  | 0.0353  | 0.0361  | -0.0395     | 0.1459 | 0.0493  | 0.0407  | -0.0308     | 0.1239 | 0.0362  | 0.0344  | 0.0146                  | 0.0611  | 0.0317  | 0.0170  |
|          | G     | -0.0337     | 0.0541  | 0.0062  | 0.0190  | -0.0341     | 0.0592 | 0.0044  | 0.0205  | -0.0272     | 0.0330 | 0.0009  | 0.0139  | -0.0034                 | 0.0428  | 0.0140  | 0.0150  |
|          | B     | -0.0433     | 0.1335  | 0.0421  | 0.0375  | -0.0487     | 0.1980 | 0.0624  | 0.0508  | -0.0132     | 0.1331 | 0.0522  | 0.0392  | 0.0141                  | 0.1238  | 0.0570  | 0.0411  |
|          | H     | -0.0112     | 0.0044  | -0.0024 | 0.0040  | -0.0173     | 0.0090 | -0.0051 | 0.0053  | -0.0265     | 0.0010 | -0.0046 | 0.0053  | -0.0089                 | 0.0007  | -0.0035 | 0.0032  |
|          | S     | -0.0066     | 0.0119  | 0.0018  | 0.0042  | -0.0135     | 0.0120 | -0.0005 | 0.0051  | -0.0241     | 0.0109 | -0.0016 | 0.0073  | -0.0084                 | 0.0068  | -0.0009 | 0.0058  |
|          | BR    | -0.0321     | 0.0764  | 0.0176  | 0.0231  | -0.0314     | 0.0926 | 0.0216  | 0.0252  | -0.0273     | 0.0679 | 0.0144  | 0.0201  | 0.0085                  | 0.0413  | 0.0194  | 0.0125  |

| Data set | Index | N treatment |         |         |         | P treatment |         |         |         | K treatment |         |         |         | Normal nutrition supply |         |         |         |
|----------|-------|-------------|---------|---------|---------|-------------|---------|---------|---------|-------------|---------|---------|---------|-------------------------|---------|---------|---------|
|          |       | Min         | Max     | Mean    | Std.dev | Min         | Max     | Mean    | Std.dev | Min         | Max     | Mean    | Std.dev | Min                     | Max     | Mean    | Std.dev |
|          | NRI   | -0.0058     | 0.0340  | 0.0104  | 0.0110  | -0.0147     | 0.0406  | 0.0164  | 0.0139  | -0.0078     | 0.0373  | 0.0118  | 0.0119  | -0.0039                 | 0.0133  | 0.0027  | 0.0054  |
|          | NGI   | -0.0525     | 0.0016  | -0.0187 | 0.0152  | -0.0400     | 0.1133  | 0.0195  | 0.0365  | -0.0622     | -0.0005 | -0.0235 | 0.0160  | -0.0302                 | -0.0086 | -0.0181 | 0.0082  |
|          | NBI   | -0.0131     | 0.0583  | 0.0172  | 0.0163  | -0.0592     | 0.0683  | -0.0186 | 0.0311  | -0.0055     | 0.0753  | 0.0279  | 0.0210  | 0.0159                  | 0.0808  | 0.0402  | 0.0210  |
|          | DGCI  | -0.0323     | 0.0776  | 0.0178  | 0.0235  | -0.0318     | 0.0939  | 0.0219  | 0.0256  | -0.0276     | 0.0690  | 0.0146  | 0.0204  | 0.0087                  | 0.0420  | 0.0198  | 0.0127  |
|          | GRVI  | -0.6790     | -0.1024 | -0.3235 | 0.1823  | -1.1010     | -0.0356 | -0.3272 | 0.3649  | -0.7925     | 0.0018  | -0.2255 | 0.2171  | -0.2927                 | -0.0096 | -0.0706 | 0.0992  |
|          | IKAW  | -0.0520     | 0.0542  | -0.0092 | 0.0248  | -0.0957     | 0.1027  | -0.0128 | 0.0349  | -0.0831     | 0.0402  | -0.0227 | 0.0309  | -0.0884                 | -0.0074 | -0.0595 | 0.0264  |
|          | IPCA  | -0.0459     | 0.0815  | 0.0025  | 0.0281  | -0.0867     | 0.1123  | 0.0008  | 0.0404  | -0.0885     | 0.0523  | -0.0195 | 0.0324  | -0.0661                 | 0.0139  | -0.0293 | 0.0252  |
