# Supplementary material
Source: MDPI journal article supplement (https://www.mdpi.com/2071-1050/10/3/762)
Supplement: s1 [file s1]

**Table S4: Summary of descriptive analysis for RGR of different indices in the 3<sup>rd</sup> fully expanded leaf.** RGR: relative growth rate. Min represents minimum value, Max represents maximum value, Mean represents the average value, Std.dev represents standard deviation. P1 represents data set calculated with 3-day intervals from DAT20 to DAT23, by that analogy, we calculated P2 to P7 data sets. P1' represents data set calculated with 6-day intervals from DAT20 to DAT26, by that analogy, we calculated P2' and P3' data sets

| Data set | Index | N treatment |        |         |         | P treatment |        |         |         | K treatment |        |         |         | Normal nutrition supply |        |         |         |
|----------|-------|-------------|--------|---------|---------|-------------|--------|---------|---------|-------------|--------|---------|---------|-------------------------|--------|---------|---------|
|          |       | Min         | Max    | Mean    | Std.dev | Min         | Max    | Mean    | Std.dev | Min         | Max    | Mean    | Std.dev | Min                     | Max    | Mean    | Std.dev |
| P1       | LW    | -0.1599     | 0.3189 | 0.0569  | 0.0982  | -0.1977     | 0.3544 | 0.0225  | 0.1132  | -1.0817     | 0.2558 | -0.0126 | 0.2070  | -0.1324                 | 0.4782 | 0.0780  | 0.1577  |
|          | LL    | -0.1654     | 0.2318 | 0.0030  | 0.0511  | -0.0482     | 0.0864 | 0.0024  | 0.0180  | -1.8003     | 0.0259 | -0.0483 | 0.2881  | -0.1152                 | 0.0893 | -0.0042 | 0.0485  |
|          | LA    | -0.0529     | 0.4555 | 0.0130  | 0.0805  | -0.0394     | 0.1436 | 0.0032  | 0.0293  | -2.8044     | 0.0184 | -0.0767 | 0.4488  | -0.1290                 | 0.0179 | -0.0121 | 0.0445  |
|          | LP    | -0.1640     | 0.2264 | 0.0064  | 0.0500  | -0.0388     | 0.0868 | 0.0076  | 0.0171  | -0.0331     | 0.0266 | 0.0002  | 0.0092  | -0.1088                 | 0.0972 | -0.0016 | 0.0488  |
|          | EC    | -0.0001     | 0.0002 | 0.0000  | 0.0001  | -0.0007     | 0.0002 | 0.0000  | 0.0001  | -0.0061     | 0.0004 | -0.0002 | 0.0010  | -0.0006                 | 0.0000 | -0.0001 | 0.0002  |
|          | RE    | -0.2539     | 0.1795 | -0.0560 | 0.0898  | -0.3356     | 0.1916 | -0.0217 | 0.1147  | -0.3212     | 0.2634 | -0.0157 | 0.1133  | -0.4773                 | 0.1477 | -0.0623 | 0.1673  |
|          | AC    | -0.1267     | 0.1463 | -0.0159 | 0.0587  | -0.3293     | 0.2205 | 0.0015  | 0.0893  | -0.2573     | 0.2380 | -0.0115 | 0.0901  | -0.3156                 | 0.0874 | -0.0178 | 0.1114  |
|          | CI    | -0.1605     | 0.2922 | 0.0538  | 0.0922  | -0.1994     | 0.3592 | 0.0201  | 0.1174  | -0.2720     | 0.7186 | 0.0357  | 0.1592  | -0.1283                 | 0.4830 | 0.0823  | 0.1645  |
|          | FF    | -0.1901     | 0.0234 | -0.0089 | 0.0363  | -0.0713     | 0.0667 | -0.0121 | 0.0262  | -0.0526     | 0.7417 | 0.0138  | 0.1215  | -0.0115                 | 0.0885 | 0.0149  | 0.0304  |
|          | R     | -0.1990     | 0.2213 | 0.0251  | 0.0696  | -0.2123     | 0.1439 | 0.0226  | 0.0644  | -0.1379     | 0.1221 | 0.0211  | 0.0456  | -0.0685                 | 0.1037 | 0.0376  | 0.0521  |
|          | G     | -0.1152     | 0.0897 | 0.0077  | 0.0361  | -0.0981     | 0.0413 | 0.0014  | 0.0268  | -0.0607     | 0.0433 | 0.0046  | 0.0198  | -0.0227                 | 0.0389 | 0.0124  | 0.0207  |
|          | B     | -0.7763     | 0.2373 | -0.0128 | 0.1532  | -0.4494     | 0.2222 | 0.0201  | 0.1313  | -0.2791     | 0.2278 | -0.0006 | 0.0937  | -0.1428                 | 0.1445 | -0.0041 | 0.0870  |
|          | H     | -0.0071     | 0.0082 | -0.0006 | 0.0029  | -0.0075     | 0.0018 | -0.0011 | 0.0016  | -0.0042     | 0.0052 | 0.0000  | 0.0020  | -0.0025                 | 0.0028 | -0.0005 | 0.0016  |
|          | S     | -0.0048     | 0.0096 | 0.0013  | 0.0033  | -0.0100     | 0.0058 | 0.0013  | 0.0035  | -0.0086     | 0.0089 | 0.0005  | 0.0038  | -0.0122                 | 0.0127 | 0.0012  | 0.0067  |
|          | BR    | -0.1133     | 0.1308 | 0.0120  | 0.0405  | -0.1464     | 0.0674 | 0.0063  | 0.0370  | -0.0906     | 0.0581 | 0.0084  | 0.0267  | -0.0599                 | 0.0418 | -0.0002 | 0.0289  |
|          | NRI   | -0.0664     | 0.0648 | 0.0115  | 0.0248  | -0.0577     | 0.0529 | 0.0127  | 0.0212  | -0.0259     | 0.0540 | 0.0112  | 0.0170  | -0.0205                 | 0.0436 | 0.0083  | 0.0206  |
|          | NGI   | -0.0668     | 0.1790 | -0.0059 | 0.0365  | -0.2502     | 0.1587 | 0.0090  | 0.0910  | -0.0405     | 0.0604 | -0.0053 | 0.0189  | -0.0217                 | 0.0389 | -0.0027 | 0.0165  |
|          | NBI   | -0.6437     | 0.0808 | -0.0264 | 0.1241  | -0.0497     | 0.1012 | -0.0072 | 0.0308  | -0.1868     | 0.1648 | -0.0105 | 0.0676  | -0.2105                 | 0.0990 | -0.0124 | 0.0923  |
|          | DGCI  | -0.1147     | 0.1323 | 0.0122  | 0.0410  | -0.1484     | 0.0686 | 0.0065  | 0.0376  | -0.0919     | 0.0593 | 0.0085  | 0.0272  | -0.0608                 | 0.0424 | -0.0002 | 0.0294  |
|          | GRVI  | -0.3640     | 0.1945 | 0.0027  | 0.0867  | -0.1401     | 0.1688 | -0.0291 | 0.0662  | -0.1139     | 0.1058 | 0.0079  | 0.0474  | -0.0477                 | 0.1142 | 0.0081  | 0.0506  |
|          | IKAW  | -0.1316     | 0.2257 | 0.0101  | 0.0733  | -0.1210     | 0.2867 | 0.0047  | 0.0796  | -0.1612     | 0.1637 | 0.0150  | 0.0658  | -0.0641                 | 0.2123 | 0.0202  | 0.0812  |
|          | IPCA  | -0.2236     | 0.0825 | -0.0038 | 0.0665  | -0.0640     | 0.1271 | 0.0007  | 0.0406  | -0.0631     | 0.0695 | 0.0045  | 0.0303  | -0.0388                 | 0.0610 | -0.0031 | 0.0291  |
|          | CLA   | -0.7015     | 2.5426 | 0.2266  | 0.5099  | -0.1376     | 2.0803 | 0.9212  | 0.7620  | -0.1583     | 2.4101 | 1.2363  | 0.8231  | -0.2051                 | 0.5636 | 0.0877  | 0.2518  |
|          | CR    | -0.1527     | 0.3864 | 0.0452  | 0.1070  | -0.4260     | 0.2214 | 0.0057  | 0.1121  | -0.3374     | 0.1913 | 0.0006  | 0.0996  | -0.1264                 | 0.0424 | -0.0090 | 0.0511  |
|          | CG    | -0.1587     | 0.3399 | 0.0163  | 0.0998  | -0.5058     | 0.2240 | -0.0472 | 0.1313  | -0.5892     | 0.0312 | -0.0748 | 0.1201  | -0.1388                 | 0.1291 | -0.0130 | 0.0759  |
|          | CB    | -0.3788     | 0.4437 | -0.0104 | 0.1358  | -0.2830     | 0.3275 | 0.0668  | 0.1449  | -0.1871     | 0.3412 | 0.0708  | 0.1440  | -0.2025                 | 0.0426 | -0.0562 | 0.0796  |
| P2       | LW    | -0.2165     | 0.2595 | -0.0224 | 0.1064  | -0.2691     | 0.1890 | -0.0170 | 0.1014  | -0.3114     | 1.0329 | 0.0094  | 0.1979  | -0.4613                 | 0.1032 | -0.0754 | 0.1599  |
|          | LL    | -0.0112     | 0.0076 | -0.0005 | 0.0036  | -0.1256     | 0.0539 | -0.0024 | 0.0243  | -0.0049     | 1.8002 | 0.0470  | 0.2881  | -0.0898                 | 0.1442 | 0.0070  | 0.0562  |

| Data set | Index | N treatment |        |         |         | P treatment |        |         |         | K treatment |        |         |         | Normal nutrition supply |        |         |         |
|----------|-------|-------------|--------|---------|---------|-------------|--------|---------|---------|-------------|--------|---------|---------|-------------------------|--------|---------|---------|
|          |       | Min         | Max    | Mean    | Std.dev | Min         | Max    | Mean    | Std.dev | Min         | Max    | Mean    | Std.dev | Min                     | Max    | Mean    | Std.dev |
|          | LA    | -0.0596     | 0.0211 | -0.0080 | 0.0179  | -0.1691     | 0.0987 | -0.0081 | 0.0446  | -0.0367     | 2.8151 | 0.0708  | 0.4511  | -0.0351                 | 0.1631 | 0.0137  | 0.0573  |
|          | LP    | -0.0122     | 0.0105 | -0.0016 | 0.0046  | -0.1291     | 0.0559 | -0.0027 | 0.0249  | -0.0083     | 0.0174 | 0.0020  | 0.0061  | -0.0834                 | 0.1399 | 0.0079  | 0.0538  |
|          | EC    | -0.0003     | 0.0001 | 0.0000  | 0.0001  | -0.0004     | 0.0006 | 0.0000  | 0.0001  | -0.0001     | 0.0061 | 0.0002  | 0.0010  | 0.0000                  | 0.0006 | 0.0001  | 0.0002  |
|          | RE    | -0.2694     | 0.1647 | 0.0153  | 0.1023  | -0.2716     | 0.2772 | 0.0112  | 0.1012  | -0.1445     | 0.3083 | 0.0144  | 0.1029  | -0.1015                 | 0.4550 | 0.0576  | 0.1606  |
|          | AC    | -0.1524     | 0.1096 | -0.0075 | 0.0623  | -0.1898     | 0.1108 | -0.0156 | 0.0654  | -0.0717     | 0.2560 | 0.0204  | 0.0684  | -0.0244                 | 0.3174 | 0.0349  | 0.1007  |
|          | CI    | -0.2177     | 0.2652 | -0.0219 | 0.1079  | -0.2557     | 0.1904 | -0.0146 | 0.1052  | -0.7674     | 0.1559 | -0.0376 | 0.1590  | -0.4639                 | 0.1046 | -0.0825 | 0.1667  |
|          | FF    | -0.0465     | 0.0241 | -0.0044 | 0.0175  | -0.1046     | 0.0891 | -0.0027 | 0.0326  | -0.7263     | 0.0487 | -0.0240 | 0.1169  | -0.1167                 | 0.0055 | -0.0266 | 0.0397  |
|          | R     | -0.0076     | 0.2032 | 0.0809  | 0.0670  | -0.0679     | 0.3117 | 0.0424  | 0.0905  | -0.0421     | 0.2499 | 0.0645  | 0.0566  | -0.0209                 | 0.1109 | 0.0379  | 0.0414  |
|          | G     | -0.0976     | 0.0839 | 0.0132  | 0.0296  | -0.0451     | 0.0603 | 0.0115  | 0.0242  | -0.0482     | 0.0896 | 0.0174  | 0.0261  | -0.0326                 | 0.0316 | -0.0012 | 0.0173  |
|          | B     | -0.0620     | 0.6999 | 0.1219  | 0.1518  | -0.2396     | 0.4341 | 0.0219  | 0.1554  | -0.1257     | 0.5413 | 0.0422  | 0.1293  | -0.0297                 | 0.4244 | 0.1974  | 0.1769  |
|          | H     | -0.0213     | 0.0044 | -0.0055 | 0.0066  | -0.0164     | 0.0055 | -0.0026 | 0.0034  | -0.0100     | 0.0026 | -0.0031 | 0.0026  | -0.0071                 | 0.0003 | -0.0024 | 0.0025  |
|          | S     | -0.0240     | 0.0080 | -0.0044 | 0.0070  | -0.0207     | 0.0097 | -0.0044 | 0.0071  | -0.0167     | 0.0082 | -0.0015 | 0.0057  | -0.0106                 | 0.0147 | -0.0016 | 0.0073  |
|          | BR    | -0.0073     | 0.0867 | 0.0364  | 0.0291  | -0.0388     | 0.1290 | 0.0224  | 0.0412  | -0.0453     | 0.1472 | 0.0306  | 0.0352  | -0.0271                 | 0.0493 | 0.0148  | 0.0249  |
|          | NRI   | -0.0146     | 0.0959 | 0.0275  | 0.0320  | -0.0222     | 0.1204 | 0.0152  | 0.0332  | -0.0008     | 0.0659 | 0.0257  | 0.0190  | -0.0401                 | 0.0572 | 0.0151  | 0.0275  |
|          | NGI   | -0.1909     | 0.0066 | -0.0402 | 0.0440  | -0.2095     | 0.2404 | -0.0093 | 0.1076  | -0.1356     | 0.0118 | -0.0215 | 0.0289  | -0.0256                 | 0.0127 | -0.0076 | 0.0128  |
|          | NBI   | -0.0785     | 0.6066 | 0.0686  | 0.1293  | -0.1684     | 0.0492 | -0.0117 | 0.0554  | -0.1649     | 0.3295 | 0.0033  | 0.0947  | -0.1777                 | 0.1049 | -0.0161 | 0.0862  |
|          | DGCI  | -0.0074     | 0.0879 | 0.0370  | 0.0296  | -0.0394     | 0.1308 | 0.0227  | 0.0418  | -0.0458     | 0.1490 | 0.0312  | 0.0357  | -0.0275                 | 0.0502 | 0.0151  | 0.0253  |
|          | GRVI  | -0.0704     | 0.4119 | 0.0832  | 0.1168  | -0.4265     | 0.0653 | -0.0483 | 0.1248  | -0.0959     | 0.2990 | 0.0461  | 0.0777  | -0.0866                 | 0.1040 | 0.0178  | 0.0668  |
|          | IKAW  | -0.2345     | 0.0796 | -0.0323 | 0.0776  | -0.1344     | 0.1656 | 0.0161  | 0.0701  | -0.3722     | 0.2077 | 0.0060  | 0.0877  | -0.0954                 | 0.0827 | 0.0002  | 0.0560  |
|          | IPCA  | -0.1645     | 0.0935 | -0.0065 | 0.0512  | -0.1035     | 0.0928 | 0.0227  | 0.0429  | -0.2106     | 0.0939 | 0.0050  | 0.0519  | -0.0624                 | 0.0332 | 0.0030  | 0.0305  |
|          | CLA   | -0.4610     | 1.3693 | 0.4491  | 0.4052  | -0.4441     | 1.2033 | 0.3608  | 0.3809  | -1.2673     | 1.8944 | 0.2452  | 0.5006  | 0.1132                  | 1.1246 | 0.4958  | 0.3045  |
|          | CR    | -0.0424     | 0.3047 | 0.0722  | 0.0739  | -0.0596     | 0.4958 | 0.0783  | 0.1044  | -0.2355     | 0.5552 | 0.0492  | 0.1379  | -0.0238                 | 0.2376 | 0.0894  | 0.0733  |
|          | CG    | -0.0395     | 0.2381 | 0.0389  | 0.0566  | -0.1343     | 0.4199 | 0.0373  | 0.1022  | -0.3288     | 0.6158 | 0.0139  | 0.1561  | -0.0274                 | 0.1902 | 0.0535  | 0.0704  |
|          | CB    | -0.1684     | 0.3115 | 0.0304  | 0.1105  | -0.3267     | 0.3790 | 0.0181  | 0.1250  | -0.2025     | 0.3516 | 0.0433  | 0.1120  | -0.1805                 | 0.0693 | -0.0101 | 0.0779  |
| P3       | LW    | -0.3842     | 0.3398 | 0.0180  | 0.1436  | -0.2264     | 0.1665 | -0.0054 | 0.0800  | -0.2594     | 0.2909 | 0.0188  | 0.1038  | -0.1316                 | 0.2984 | 0.0775  | 0.1345  |
|          | LL    | -0.0026     | 0.0735 | 0.0043  | 0.0133  | -0.0540     | 0.1222 | 0.0041  | 0.0230  | -0.0238     | 0.0044 | -0.0009 | 0.0046  | -0.0294                 | 0.1277 | 0.0086  | 0.0428  |
|          | LA    | -0.0874     | 0.1487 | 0.0002  | 0.0345  | -0.0977     | 0.1828 | -0.0056 | 0.0394  | -0.0936     | 0.0164 | -0.0072 | 0.0180  | -0.0253                 | 0.0097 | -0.0062 | 0.0124  |
|          | LP    | -0.0230     | 0.0476 | -0.0058 | 0.0125  | -0.0571     | 0.1234 | -0.0085 | 0.0262  | -0.0449     | 0.0000 | -0.0123 | 0.0087  | -0.0410                 | 0.1280 | -0.0016 | 0.0471  |
|          | EC    | -0.0004     | 0.0004 | 0.0000  | 0.0001  | -0.0001     | 0.0004 | 0.0000  | 0.0001  | -0.0003     | 0.0002 | 0.0000  | 0.0001  | -0.0002                 | 0.0000 | -0.0001 | 0.0001  |
|          | RE    | -0.3166     | 0.3129 | -0.0252 | 0.1365  | -0.1962     | 0.2068 | -0.0043 | 0.0825  | -0.2826     | 0.2643 | -0.0251 | 0.1063  | -0.3011                 | 0.1216 | -0.0646 | 0.1321  |
|          | AC    | -0.1815     | 0.2082 | -0.0182 | 0.0903  | -0.1107     | 0.1564 | 0.0002  | 0.0601  | -0.2157     | 0.1632 | -0.0210 | 0.0793  | -0.1963                 | 0.0260 | -0.0685 | 0.0820  |

| Data set | Index | N treatment |        |         |         | P treatment |        |         |         | K treatment |        |         |         | Normal nutrition supply |        |         |         |
|----------|-------|-------------|--------|---------|---------|-------------|--------|---------|---------|-------------|--------|---------|---------|-------------------------|--------|---------|---------|
|          |       | Min         | Max    | Mean    | Std.dev | Min         | Max    | Mean    | Std.dev | Min         | Max    | Mean    | Std.dev | Min                     | Max    | Mean    | Std.dev |
|          | CI    | -0.3981     | 0.3145 | 0.0137  | 0.1433  | -0.2280     | 0.1675 | -0.0095 | 0.0821  | -0.2631     | 0.2966 | 0.0197  | 0.1048  | -0.1329                 | 0.2980 | 0.0689  | 0.1352  |
|          | FF    | -0.0824     | 0.0535 | 0.0088  | 0.0307  | -0.0651     | 0.0453 | 0.0114  | 0.0282  | -0.0677     | 0.0708 | 0.0173  | 0.0243  | -0.0121                 | 0.0620 | 0.0247  | 0.0218  |
|          | R     | -0.0633     | 0.1896 | 0.0264  | 0.0434  | -0.0287     | 0.1391 | 0.0455  | 0.0362  | -0.1245     | 0.1300 | 0.0461  | 0.0474  | -0.0713                 | 0.1007 | 0.0244  | 0.0428  |
|          | G     | -0.0382     | 0.1741 | 0.0063  | 0.0372  | -0.0346     | 0.0713 | 0.0077  | 0.0221  | -0.0877     | 0.0807 | 0.0002  | 0.0341  | -0.0209                 | 0.0314 | 0.0078  | 0.0151  |
|          | B     | -0.0165     | 0.3025 | 0.1328  | 0.0920  | 0.0060      | 0.3644 | 0.1697  | 0.0997  | -0.1969     | 0.3904 | 0.1965  | 0.1403  | -0.1823                 | 0.0910 | -0.0345 | 0.0718  |
|          | H     | -0.0100     | 0.0102 | -0.0002 | 0.0042  | -0.0206     | 0.0018 | -0.0021 | 0.0042  | -0.0044     | 0.0044 | -0.0009 | 0.0020  | -0.0047                 | 0.0011 | -0.0020 | 0.0022  |
|          | S     | -0.0256     | 0.0103 | -0.0065 | 0.0096  | -0.0311     | 0.0037 | -0.0106 | 0.0103  | -0.0374     | 0.0143 | -0.0104 | 0.0122  | -0.0165                 | 0.0121 | -0.0025 | 0.0098  |
|          | BR    | -0.0300     | 0.1766 | 0.0172  | 0.0358  | -0.0294     | 0.0868 | 0.0239  | 0.0232  | -0.0948     | 0.0804 | 0.0195  | 0.0367  | -0.0410                 | 0.0561 | 0.0240  | 0.0256  |
|          | NRI   | -0.0463     | 0.0272 | -0.0060 | 0.0173  | -0.0376     | 0.0373 | 0.0010  | 0.0163  | -0.0258     | 0.0372 | 0.0034  | 0.0157  | -0.0082                 | 0.0423 | 0.0102  | 0.0191  |
|          | NGI   | -0.0544     | 0.0025 | -0.0261 | 0.0190  | -0.0513     | 0.2816 | 0.1123  | 0.1059  | -0.0885     | 0.0487 | -0.0425 | 0.0259  | -0.0674                 | 0.0429 | -0.0311 | 0.0368  |
|          | NBI   | -0.0263     | 0.2511 | 0.1004  | 0.0867  | -0.0698     | 0.0787 | -0.0239 | 0.0378  | -0.0782     | 0.3300 | 0.1537  | 0.1200  | -0.1185                 | 0.3507 | 0.1351  | 0.1859  |
|          | DGCI  | -0.0307     | 0.1787 | 0.0173  | 0.0363  | -0.0296     | 0.0880 | 0.0242  | 0.0235  | -0.0960     | 0.0812 | 0.0197  | 0.0372  | -0.0416                 | 0.0569 | 0.0244  | 0.0260  |
|          | GRVI  | -0.1386     | 0.0911 | 0.0014  | 0.0554  | -0.1664     | 0.0474 | -0.0597 | 0.0420  | -0.1335     | 0.1510 | 0.0247  | 0.0824  | -0.1382                 | 0.1272 | 0.0273  | 0.0841  |
|          | IKAW  | -0.2160     | 0.1331 | -0.0943 | 0.0879  | -0.2642     | 0.1316 | -0.1201 | 0.0827  | -0.3343     | 0.1412 | -0.1247 | 0.1208  | -0.3165                 | 0.1534 | -0.1337 | 0.1939  |
|          | IPCA  | -0.1414     | 0.3042 | -0.0457 | 0.0850  | -0.1253     | 0.1336 | -0.0616 | 0.0538  | -0.2687     | 0.1696 | -0.0611 | 0.0924  | -0.1125                 | 0.0925 | -0.0322 | 0.0743  |
|          | CLA   | -1.0933     | 0.6610 | 0.0338  | 0.2822  | -0.4805     | 0.9494 | 0.1666  | 0.2881  | -0.3208     | 1.6021 | 0.1860  | 0.3941  | -0.3494                 | 0.9998 | 0.1675  | 0.3506  |
|          | CR    | -0.1969     | 0.0869 | -0.0264 | 0.0705  | -0.1782     | 0.1425 | 0.0315  | 0.0615  | -0.2283     | 0.2021 | 0.0487  | 0.0867  | -0.0907                 | 0.0509 | 0.0051  | 0.0395  |
|          | CG    | -0.2305     | 0.0926 | -0.0423 | 0.0746  | -0.2007     | 0.1417 | 0.0073  | 0.0600  | -0.2892     | 0.1655 | 0.0148  | 0.0852  | -0.1407                 | 0.0534 | 0.0005  | 0.0527  |
|          | CB    | 0.0075      | 0.3590 | 0.1202  | 0.0996  | -0.0461     | 0.2699 | 0.1301  | 0.0863  | -0.1160     | 0.3220 | 0.1023  | 0.1174  | -0.3616                 | 0.3252 | 0.0558  | 0.2233  |
| P4       | LW    | -0.1782     | 0.3199 | 0.0316  | 0.1256  | -0.3013     | 0.2688 | 0.0048  | 0.1230  | -0.2813     | 0.2664 | 0.0053  | 0.1164  | -0.2815                 | 0.3112 | -0.0223 | 0.1982  |
|          | LL    | -0.0733     | 0.0023 | -0.0029 | 0.0141  | -0.0854     | 0.0697 | -0.0028 | 0.0230  | -0.1125     | 0.0233 | -0.0030 | 0.0194  | -0.2422                 | 0.1799 | 0.0097  | 0.1085  |
|          | LA    | -0.1719     | 0.0458 | -0.0170 | 0.0402  | -0.2621     | 0.1385 | -0.0134 | 0.0585  | -0.1901     | 0.0440 | -0.0132 | 0.0408  | -0.0257                 | 0.3737 | 0.0643  | 0.1397  |
|          | LP    | -0.0772     | 0.0200 | 0.0019  | 0.0170  | -0.0752     | 0.0871 | 0.0048  | 0.0239  | -0.0825     | 0.0691 | 0.0065  | 0.0205  | -0.2408                 | 0.1874 | 0.0140  | 0.1113  |
|          | EC    | -0.0002     | 0.0003 | 0.0000  | 0.0001  | -0.0002     | 0.0001 | 0.0000  | 0.0001  | -0.0003     | 0.0001 | 0.0000  | 0.0001  | 0.0000                  | 0.0002 | 0.0000  | 0.0001  |
|          | RE    | -0.3569     | 0.2347 | -0.0404 | 0.1387  | -0.3473     | 0.2739 | -0.0154 | 0.1384  | -0.2751     | 0.2767 | -0.0155 | 0.1109  | -0.1504                 | 0.2769 | 0.0296  | 0.1388  |
|          | AC    | -0.2203     | 0.1326 | -0.0301 | 0.0948  | -0.3632     | 0.1263 | -0.0168 | 0.1022  | -0.2189     | 0.1357 | -0.0254 | 0.0850  | -0.1205                 | 0.1777 | 0.0151  | 0.1017  |
|          | CI    | -0.1794     | 0.3232 | 0.0359  | 0.1230  | -0.3022     | 0.2462 | 0.0076  | 0.1217  | -0.2726     | 0.2695 | 0.0084  | 0.1100  | -0.2835                 | 0.1351 | -0.0320 | 0.1396  |
|          | FF    | -0.0934     | 0.1285 | -0.0143 | 0.0437  | -0.2720     | 0.0807 | -0.0229 | 0.0595  | -0.2372     | 0.0394 | -0.0262 | 0.0470  | -0.0579                 | 0.0727 | -0.0111 | 0.0346  |
|          | R     | -0.0129     | 0.1365 | 0.0412  | 0.0345  | -0.0083     | 0.2326 | 0.0606  | 0.0487  | -0.0502     | 0.2463 | 0.0576  | 0.0594  | -0.1089                 | 0.3671 | 0.0819  | 0.1323  |
|          | G     | -0.0365     | 0.0722 | 0.0050  | 0.0240  | -0.0312     | 0.0748 | 0.0127  | 0.0263  | -0.0577     | 0.1082 | 0.0099  | 0.0376  | -0.0640                 | 0.1917 | 0.0272  | 0.0722  |
|          | B     | -0.0716     | 0.1803 | 0.0231  | 0.0683  | -0.1498     | 0.2540 | 0.0141  | 0.0800  | -0.0659     | 0.2207 | 0.0445  | 0.0652  | -0.1396                 | 0.5594 | 0.1075  | 0.1835  |

| Data set | Index | N treatment |         |         |         | P treatment |        |         |         | K treatment |        |         |         | Normal nutrition supply |         |         |         |
|----------|-------|-------------|---------|---------|---------|-------------|--------|---------|---------|-------------|--------|---------|---------|-------------------------|---------|---------|---------|
|          |       | Min         | Max     | Mean    | Std.dev | Min         | Max    | Mean    | Std.dev | Min         | Max    | Mean    | Std.dev | Min                     | Max     | Mean    | Std.dev |
|          | H     | -0.0148     | 0.0162  | 0.0000  | 0.0056  | -0.0288     | 0.0061 | -0.0048 | 0.0066  | -0.0270     | 0.0039 | -0.0052 | 0.0056  | -0.0104                 | 0.0063  | -0.0033 | 0.0049  |
|          | S     | -0.0134     | 0.0209  | 0.0051  | 0.0096  | -0.0178     | 0.0276 | 0.0039  | 0.0110  | -0.0314     | 0.0196 | 0.0015  | 0.0096  | -0.0136                 | 0.0038  | -0.0023 | 0.0060  |
|          | BR    | -0.0177     | 0.0859  | 0.0173  | 0.0216  | -0.0154     | 0.1227 | 0.0270  | 0.0317  | -0.0542     | 0.1590 | 0.0261  | 0.0441  | -0.0799                 | 0.2618  | 0.0203  | 0.0975  |
|          | NRI   | -0.0110     | 0.0533  | 0.0187  | 0.0126  | 0.0007      | 0.0783 | 0.0293  | 0.0156  | -0.0295     | 0.0695 | 0.0228  | 0.0173  | -0.0303                 | 0.0436  | 0.0094  | 0.0210  |
|          | NGI   | -0.0925     | 0.0157  | -0.0174 | 0.0294  | -0.1353     | 0.0984 | -0.0014 | 0.0425  | -0.0695     | 0.0002 | -0.0250 | 0.0220  | -0.1318                 | 0.0287  | -0.0122 | 0.0438  |
|          | NBI   | -0.0529     | 0.1151  | 0.0007  | 0.0473  | -0.1202     | 0.0542 | -0.0345 | 0.0382  | -0.0277     | 0.0792 | 0.0096  | 0.0288  | -0.0469                 | 0.2359  | 0.0090  | 0.0861  |
|          | DGCI  | -0.0179     | 0.0868  | 0.0176  | 0.0219  | -0.0156     | 0.1245 | 0.0274  | 0.0321  | -0.0547     | 0.1613 | 0.0265  | 0.0446  | -0.0810                 | 0.2649  | 0.0205  | 0.0987  |
|          | GRVI  | -0.0621     | 0.2179  | 0.0362  | 0.0703  | -0.2653     | 0.0034 | -0.0710 | 0.0552  | -0.0724     | 0.2056 | 0.0612  | 0.0663  | -0.2603                 | 0.0873  | 0.0159  | 0.1042  |
|          | IKAW  | -0.1011     | 0.1589  | 0.0324  | 0.0676  | -0.1037     | 0.2192 | 0.0599  | 0.0781  | -0.1613     | 0.1280 | 0.0174  | 0.0490  | -0.2490                 | 0.1733  | -0.0440 | 0.1320  |
|          | IPCA  | -0.1253     | 0.1434  | 0.0376  | 0.0690  | -0.1330     | 0.2317 | 0.0433  | 0.0919  | -0.1102     | 0.2811 | 0.0079  | 0.0717  | -0.1653                 | 0.0853  | -0.0331 | 0.0719  |
|          | CLA   | -0.0757     | 1.6579  | 0.3804  | 0.4642  | -0.3627     | 1.6493 | 0.4198  | 0.4781  | -0.4973     | 0.8317 | 0.2874  | 0.2826  | -0.1791                 | 0.8737  | 0.3349  | 0.3143  |
|          | CR    | -0.0511     | 0.2188  | 0.0754  | 0.0575  | -0.1021     | 0.1840 | 0.0290  | 0.0558  | -0.0252     | 0.2540 | 0.0625  | 0.0734  | -0.0336                 | 0.1770  | 0.0221  | 0.0615  |
|          | CG    | -0.0198     | 0.2586  | 0.0673  | 0.0692  | -0.0492     | 0.2005 | 0.0333  | 0.0495  | -0.0437     | 0.2517 | 0.0479  | 0.0764  | -0.0413                 | 0.1466  | 0.0220  | 0.0483  |
|          | CB    | -0.1223     | 0.0715  | -0.0241 | 0.0533  | -0.3988     | 0.1002 | -0.0519 | 0.1052  | -0.1072     | 0.2238 | 0.0267  | 0.0778  | -0.1028                 | 0.0864  | -0.0179 | 0.0640  |
| P5       | LW    | -0.2935     | 0.0514  | -0.0566 | 0.1186  | -0.2063     | 0.4699 | 0.0454  | 0.1498  | -0.2554     | 0.1445 | -0.0150 | 0.1070  | -0.2935                 | 0.0514  | -0.0566 | 0.1186  |
|          | LL    | -0.2232     | 0.0026  | -0.0424 | 0.0837  | -0.0544     | 0.1167 | 0.0018  | 0.0281  | -0.0771     | 0.0111 | -0.0045 | 0.0168  | -0.2232                 | 0.0026  | -0.0424 | 0.0837  |
|          | LA    | -0.6683     | 0.0077  | -0.1233 | 0.2174  | -0.3203     | 0.0358 | -0.0429 | 0.0720  | -0.3555     | 0.0791 | -0.0341 | 0.0772  | -0.6683                 | 0.0077  | -0.1233 | 0.2174  |
|          | LP    | -0.2278     | 0.0080  | -0.0441 | 0.0850  | -0.0637     | 0.1203 | 0.0005  | 0.0298  | -0.0864     | 0.0082 | -0.0103 | 0.0250  | -0.2278                 | 0.0080  | -0.0441 | 0.0850  |
|          | EC    | 0.0000      | 0.0001  | 0.0000  | 0.0000  | -0.0002     | 0.0002 | 0.0000  | 0.0001  | -0.0010     | 0.0003 | 0.0000  | 0.0002  | 0.0000                  | 0.0001  | 0.0000  | 0.0000  |
|          | RE    | -0.1304     | 0.3401  | 0.0424  | 0.1236  | -0.6140     | 0.1994 | -0.0976 | 0.2144  | -0.4840     | 0.2298 | 0.0012  | 0.1571  | -0.4777                 | 0.2129  | -0.0218 | 0.2177  |
|          | AC    | -0.2732     | 0.1845  | -0.0030 | 0.1254  | -0.3996     | 0.1732 | -0.0764 | 0.1293  | -0.4900     | 0.2120 | -0.0133 | 0.1224  | -0.2732                 | 0.1845  | -0.0030 | 0.1254  |
|          | CI    | -0.2281     | 0.2557  | -0.0143 | 0.1309  | -0.2073     | 0.3533 | 0.0436  | 0.1400  | -0.2610     | 0.1483 | -0.0105 | 0.1089  | -0.2281                 | 0.2557  | -0.0143 | 0.1309  |
|          | FF    | -0.2127     | 0.0556  | -0.0350 | 0.0790  | -0.3763     | 0.0793 | -0.0438 | 0.0935  | -0.3677     | 0.2037 | -0.0136 | 0.1036  | -0.2127                 | 0.0556  | -0.0350 | 0.0790  |
|          | R     | -0.0295     | 0.2485  | 0.0924  | 0.0875  | -0.0638     | 0.1573 | 0.0527  | 0.0682  | -0.0684     | 0.1271 | 0.0585  | 0.0631  | -0.0295                 | 0.2485  | 0.0924  | 0.0875  |
|          | G     | -0.0450     | 0.1096  | 0.0265  | 0.0512  | -0.0491     | 0.0906 | -0.0077 | 0.0287  | -0.0575     | 0.0744 | 0.0036  | 0.0299  | -0.0450                 | 0.1096  | 0.0265  | 0.0512  |
|          | B     | -0.0129     | 0.4125  | 0.1313  | 0.1407  | -0.0143     | 0.3210 | 0.1197  | 0.0740  | -0.0412     | 0.1948 | 0.0949  | 0.0655  | -0.0129                 | 0.4125  | 0.1313  | 0.1407  |
|          | H     | -0.0233     | 0.0005  | -0.0108 | 0.0089  | -0.0251     | 0.0117 | -0.0036 | 0.0085  | -0.0243     | 0.0131 | -0.0075 | 0.0088  | -0.0233                 | 0.0005  | -0.0108 | 0.0089  |
|          | S     | -0.0224     | 0.0035  | -0.0066 | 0.0088  | -0.0128     | 0.0256 | 0.0007  | 0.0089  | -0.0395     | 0.0243 | -0.0041 | 0.0124  | -0.0224                 | 0.0035  | -0.0066 | 0.0088  |
|          | BR    | -0.0372     | 0.1693  | 0.0451  | 0.0627  | -0.0455     | 0.1141 | 0.0188  | 0.0335  | -0.0560     | 0.0935 | 0.0266  | 0.0382  | -0.0372                 | 0.1693  | 0.0451  | 0.0627  |
|          | NRI   | -0.0043     | 0.0552  | 0.0257  | 0.0185  | -0.0331     | 0.0610 | 0.0113  | 0.0306  | -0.0252     | 0.0491 | 0.0144  | 0.0218  | -0.0043                 | 0.0552  | 0.0257  | 0.0185  |
|          | NGI   | -0.1128     | -0.0121 | -0.0454 | 0.0372  | -0.0364     | 0.2121 | 0.0459  | 0.0644  | -0.0870     | 0.0233 | -0.0405 | 0.0307  | -0.1128                 | -0.0121 | -0.0454 | 0.0372  |

| Data set | Index | N treatment |         |         |         | P treatment |         |         |         | K treatment |         |         |         | Normal nutrition supply |         |         |         |
|----------|-------|-------------|---------|---------|---------|-------------|---------|---------|---------|-------------|---------|---------|---------|-------------------------|---------|---------|---------|
|          |       | Min         | Max     | Mean    | Std.dev | Min         | Max     | Mean    | Std.dev | Min         | Max     | Mean    | Std.dev | Min                     | Max     | Mean    | Std.dev |
|          | NBI   | -0.0011     | 0.1902  | 0.0570  | 0.0660  | -0.1319     | 0.1264  | -0.0168 | 0.0775  | -0.0114     | 0.1161  | 0.0509  | 0.0325  | -0.0011                 | 0.1902  | 0.0570  | 0.0660  |
|          | DGCI  | -0.0374     | 0.1714  | 0.0458  | 0.0634  | -0.0460     | 0.1156  | 0.0191  | 0.0339  | -0.0565     | 0.0946  | 0.0271  | 0.0387  | -0.0374                 | 0.1714  | 0.0458  | 0.0634  |
|          | GRVI  | -1.1771     | -0.7901 | -0.9836 | 0.2737  | -1.8136     | -0.4672 | -1.1404 | 0.9521  | -0.3619     | -0.0831 | -0.1929 | 0.1100  | -0.3746                 | -0.0038 | -0.2199 | 0.1626  |
|          | IKAW  | -0.8671     | 0.1977  | -0.1844 | 0.2832  | -0.2060     | 0.0575  | -0.0889 | 0.0639  | -0.1459     | 0.0349  | -0.0536 | 0.0471  | -0.8671                 | 0.1977  | -0.1844 | 0.2832  |
|          | IPCA  | -0.2255     | -0.0033 | -0.1032 | 0.0759  | -0.1783     | 0.1946  | -0.0734 | 0.0706  | -0.1855     | 0.1172  | -0.0265 | 0.0779  | -0.2255                 | -0.0033 | -0.1032 | 0.0759  |
|          | CLA   | -0.0751     | 0.9527  | 0.4274  | 0.3289  | -0.1282     | 1.2716  | 0.3620  | 0.4033  | -0.0631     | 0.9083  | 0.2489  | 0.3004  | -0.0751                 | 0.9527  | 0.4274  | 0.3289  |
|          | CR    | 0.0150      | 0.0911  | 0.0481  | 0.0234  | -0.0458     | 0.1878  | 0.0414  | 0.0574  | -0.0720     | 0.1239  | 0.0290  | 0.0617  | 0.0150                  | 0.0911  | 0.0481  | 0.0234  |
|          | CG    | -0.0188     | 0.0354  | 0.0052  | 0.0162  | -0.0399     | 0.0631  | 0.0024  | 0.0250  | -0.0740     | 0.0577  | -0.0081 | 0.0307  | -0.0188                 | 0.0354  | 0.0052  | 0.0162  |
|          | CB    | -0.0075     | 0.2525  | 0.0891  | 0.0901  | -0.0234     | 0.2899  | 0.0629  | 0.0707  | 0.0035      | 0.1487  | 0.0641  | 0.0365  | -0.0075                 | 0.2525  | 0.0891  | 0.0901  |
| P6       | LW    | -0.2090     | 0.1952  | 0.0004  | 0.1155  | -0.1747     | 0.1662  | -0.0214 | 0.0893  | -0.1658     | 0.1400  | -0.0097 | 0.0873  | -0.1698                 | 0.2242  | 0.0759  | 0.1152  |
|          | LL    | -0.0208     | 0.1197  | 0.0046  | 0.0358  | -0.1336     | 0.0661  | -0.0091 | 0.0372  | -0.0039     | 0.0543  | 0.0069  | 0.0162  | -0.0042                 | 0.2149  | 0.0526  | 0.0857  |
|          | LA    | -0.1066     | 0.2327  | -0.0255 | 0.0878  | -0.1499     | 0.0987  | -0.0257 | 0.0507  | -0.1765     | 0.0060  | -0.0267 | 0.0404  | -0.0653                 | 0.0134  | -0.0244 | 0.0276  |
|          | LP    | -0.0164     | 0.1200  | 0.0110  | 0.0359  | -0.1364     | 0.0848  | -0.0062 | 0.0400  | -0.0087     | 0.0851  | 0.0130  | 0.0267  | -0.0072                 | 0.0014  | -0.0031 | 0.0030  |
|          | EC    | -0.0003     | 0.0249  | 0.0019  | 0.0069  | -0.0002     | 0.0002  | 0.0000  | 0.0001  | -0.0001     | 0.0004  | 0.0000  | 0.0001  | -0.0001                 | 0.0001  | 0.0000  | 0.0001  |
|          | RE    | -0.3007     | 0.3395  | -0.0072 | 0.1523  | -0.4137     | 0.6408  | 0.0063  | 0.1781  | -0.3108     | 0.3130  | -0.0064 | 0.1240  | -0.2262                 | 0.5781  | -0.0469 | 0.2437  |
|          | AC    | -0.3693     | 0.1677  | -0.0261 | 0.1299  | -0.1288     | 0.1061  | 0.0065  | 0.0699  | -0.3878     | 0.1244  | -0.0219 | 0.1104  | -0.1577                 | 0.3484  | -0.0281 | 0.1494  |
|          | CI    | -0.8077     | 0.1963  | -0.0752 | 0.2463  | -0.1753     | 0.1663  | -0.0122 | 0.0955  | -0.1619     | 0.1428  | -0.0166 | 0.0845  | -0.3848                 | 0.2255  | 0.0233  | 0.1698  |
|          | FF    | -0.8732     | -0.0074 | -0.1100 | 0.2312  | -0.0911     | 0.1599  | -0.0132 | 0.0504  | -0.3267     | 0.0073  | -0.0526 | 0.0815  | -0.2104                 | 0.1744  | -0.0275 | 0.0994  |
|          | R     | -0.0889     | 0.1461  | 0.0417  | 0.0743  | -0.1437     | 0.1535  | 0.0465  | 0.0643  | -0.0057     | 0.1241  | 0.0500  | 0.0323  | -0.2840                 | 0.0505  | -0.0693 | 0.1316  |
|          | G     | -0.0745     | 0.1340  | 0.0395  | 0.0535  | -0.0767     | 0.0800  | 0.0170  | 0.0366  | -0.0035     | 0.0792  | 0.0234  | 0.0235  | -0.1721                 | 0.0247  | -0.0535 | 0.0793  |
|          | B     | -0.1274     | 0.1510  | 0.0191  | 0.0731  | -0.4368     | 0.1276  | -0.0028 | 0.1132  | -0.0833     | 0.1097  | 0.0314  | 0.0489  | -0.3289                 | 0.0593  | -0.0832 | 0.1432  |
|          | H     | -0.0113     | 0.0118  | 0.0010  | 0.0071  | -0.0214     | 0.0120  | -0.0036 | 0.0084  | -0.0197     | 0.0040  | -0.0056 | 0.0061  | -0.0048                 | 0.0323  | 0.0045  | 0.0116  |
|          | S     | -0.0206     | 0.0144  | 0.0008  | 0.0112  | -0.0140     | 0.0215  | 0.0015  | 0.0093  | -0.0196     | 0.0200  | -0.0009 | 0.0088  | -0.0144                 | 0.0138  | 0.0026  | 0.0090  |
|          | BR    | -0.0788     | 0.1352  | 0.0395  | 0.0589  | -0.1168     | 0.0952  | 0.0264  | 0.0476  | -0.0001     | 0.0964  | 0.0330  | 0.0245  | -0.2174                 | 0.1166  | -0.0037 | 0.1144  |
|          | NRI   | -0.0723     | 0.0343  | 0.0056  | 0.0251  | -0.0142     | 0.0487  | 0.0205  | 0.0153  | -0.0097     | 0.0312  | 0.0140  | 0.0102  | -0.0348                 | 0.0423  | 0.0086  | 0.0275  |
|          | NGI   | -0.0407     | 0.0500  | 0.0035  | 0.0208  | -0.0373     | 0.0882  | 0.0031  | 0.0246  | -0.0525     | 0.0077  | -0.0126 | 0.0194  | -0.0515                 | 0.0780  | -0.0034 | 0.0444  |
|          | NBI   | -0.0397     | 0.0206  | -0.0169 | 0.0188  | -0.2719     | 0.0084  | -0.0408 | 0.0568  | -0.0736     | 0.0767  | -0.0046 | 0.0327  | -0.0788                 | 0.0452  | -0.0002 | 0.0420  |
|          | DGCI  | -0.0795     | 0.1367  | 0.0399  | 0.0595  | -0.1184     | 0.0963  | 0.0267  | 0.0482  | 0.0001      | 0.0976  | 0.0335  | 0.0248  | -0.2203                 | 0.1179  | -0.0038 | 0.1160  |
|          | GRVI  | -0.1811     | 0.1112  | -0.0029 | 0.0647  | -0.1697     | 0.1003  | -0.0437 | 0.0584  | -0.0346     | 0.1189  | 0.0296  | 0.0456  | 0.0077                  | 0.1674  | 0.0556  | 0.0581  |
|          | IKAW  | -0.1354     | 0.1079  | 0.0438  | 0.0635  | -0.0455     | 0.2795  | 0.0645  | 0.0700  | -0.1104     | 0.1410  | 0.0303  | 0.0578  | -0.2394                 | 0.3805  | 0.0816  | 0.1683  |
|          | IPCA  | 0.0070      | 0.1814  | 0.0955  | 0.0538  | -0.0468     | 0.1658  | 0.0929  | 0.0613  | -0.0938     | 0.1648  | 0.0684  | 0.0651  | -0.0944                 | 0.2454  | 0.0372  | 0.1114  |

| Data set | Index | N treatment |         |         |         | P treatment |         |         |         | K treatment |        |         |         | Normal nutrition supply |         |         |         |
|----------|-------|-------------|---------|---------|---------|-------------|---------|---------|---------|-------------|--------|---------|---------|-------------------------|---------|---------|---------|
|          |       | Min         | Max     | Mean    | Std.dev | Min         | Max     | Mean    | Std.dev | Min         | Max    | Mean    | Std.dev | Min                     | Max     | Mean    | Std.dev |
|          | CLA   | -0.2036     | 0.2541  | 0.0862  | 0.1408  | -0.0954     | 0.6427  | 0.2454  | 0.1969  | -0.1816     | 0.4911 | 0.1565  | 0.1596  | -0.0850                 | 0.5965  | 0.2325  | 0.2436  |
|          | CR    | -0.0090     | 0.1260  | 0.0422  | 0.0455  | -0.0838     | 0.0762  | 0.0130  | 0.0457  | -0.1189     | 0.1112 | 0.0044  | 0.0529  | -0.0603                 | 0.1103  | 0.0260  | 0.0584  |
|          | CG    | -0.0239     | 0.0777  | 0.0192  | 0.0295  | -0.1030     | 0.0409  | 0.0011  | 0.0288  | -0.0763     | 0.0870 | -0.0012 | 0.0359  | -0.0443                 | 0.0846  | 0.0038  | 0.0438  |
|          | CB    | -0.1473     | 0.1171  | -0.0178 | 0.0898  | -0.2864     | 0.0675  | -0.0593 | 0.1100  | -0.1799     | 0.1017 | -0.0318 | 0.0688  | -0.1025                 | 0.1335  | 0.0008  | 0.0813  |
| P7       | LW    | -0.0652     | 0.2201  | 0.0548  | 0.1480  | -0.1974     | 0.1794  | 0.0262  | 0.1036  | -0.2153     | 0.2293 | -0.0032 | 0.1125  | -0.2416                 | -0.0445 | -0.1425 | 0.0986  |
|          | LL    | -0.0024     | 0.0177  | 0.0052  | 0.0109  | -0.0146     | 0.0205  | -0.0001 | 0.0090  | -0.0628     | 0.0025 | -0.0059 | 0.0162  | -0.0017                 | 0.0001  | -0.0009 | 0.0009  |
|          | LA    | -0.0759     | -0.0230 | -0.0410 | 0.0303  | -0.0862     | -0.0072 | -0.0373 | 0.0221  | -0.0619     | 0.0186 | -0.0186 | 0.0320  | -0.0649                 | -0.0079 | -0.0328 | 0.0292  |
|          | LP    | 0.0002      | 0.0272  | 0.0105  | 0.0145  | -0.0109     | 0.0142  | 0.0004  | 0.0071  | -0.0665     | 0.0020 | -0.0078 | 0.0160  | 0.0000                  | 0.0005  | 0.0002  | 0.0002  |
|          | EC    | -0.0001     | 0.0000  | 0.0000  | 0.0001  | -0.0001     | 0.0001  | 0.0000  | 0.0001  | -0.0002     | 0.0002 | 0.0000  | 0.0001  | 0.0000                  | 0.0002  | 0.0001  | 0.0001  |
|          | RE    | -0.3138     | 0.0436  | -0.1009 | 0.1882  | -0.2222     | 0.1131  | -0.0635 | 0.0949  | -0.2349     | 0.1014 | -0.0442 | 0.0987  | 0.0384                  | 0.2160  | 0.1107  | 0.0933  |
|          | AC    | -0.2293     | -0.0024 | -0.0806 | 0.1289  | -0.1283     | 0.0991  | -0.0400 | 0.0701  | -0.1670     | 0.1146 | -0.0221 | 0.0797  | -0.0419                 | 0.1421  | 0.0430  | 0.0928  |
|          | CI    | -0.0628     | 0.2024  | 0.0496  | 0.1371  | -0.1957     | 0.1805  | 0.0263  | 0.1050  | -0.2145     | 0.2408 | 0.0027  | 0.1118  | -0.2417                 | -0.0428 | -0.1416 | 0.0995  |
|          | FF    | -0.1303     | -0.0245 | -0.0621 | 0.0592  | -0.0714     | -0.0124 | -0.0382 | 0.0217  | -0.1467     | 0.0360 | -0.0363 | 0.0528  | -0.0659                 | -0.0080 | -0.0332 | 0.0297  |
|          | R     | -0.0255     | 0.0105  | -0.0061 | 0.0181  | -0.0233     | 0.1826  | 0.0262  | 0.0627  | -0.0255     | 0.1180 | 0.0312  | 0.0382  | -0.0736                 | 0.2446  | 0.0691  | 0.1616  |
|          | G     | -0.0305     | 0.0066  | -0.0091 | 0.0192  | -0.0163     | 0.0921  | 0.0194  | 0.0334  | -0.0122     | 0.0801 | 0.0292  | 0.0258  | -0.0866                 | 0.0495  | 0.0027  | 0.0773  |
|          | B     | -0.0069     | -0.0025 | -0.0041 | 0.0024  | -0.0040     | 0.3123  | 0.0606  | 0.0972  | 0.0021      | 0.1395 | 0.0577  | 0.0405  | -0.0804                 | 0.1813  | 0.0466  | 0.1310  |
|          | H     | 0.0017      | 0.0055  | 0.0036  | 0.0019  | -0.0082     | 0.0149  | 0.0027  | 0.0075  | -0.0143     | 0.0229 | 0.0003  | 0.0107  | -0.0243                 | -0.0022 | -0.0158 | 0.0119  |
|          | S     | 0.0012      | 0.0070  | 0.0049  | 0.0032  | -0.0112     | 0.0175  | 0.0022  | 0.0094  | -0.0152     | 0.0200 | 0.0010  | 0.0101  | -0.0242                 | 0.0033  | -0.0074 | 0.0147  |
|          | BR    | -0.0268     | 0.0072  | -0.0077 | 0.0174  | -0.0178     | 0.1335  | 0.0241  | 0.0456  | -0.0379     | 0.0831 | 0.0214  | 0.0308  | -0.0741                 | 0.0461  | 0.0039  | 0.0676  |
|          | NRI   | -0.0025     | 0.0046  | 0.0006  | 0.0037  | -0.0177     | 0.0174  | -0.0038 | 0.0101  | -0.0216     | 0.0226 | -0.0051 | 0.0128  | -0.0035                 | 0.0908  | 0.0310  | 0.0520  |
|          | NGI   | -0.0075     | 0.0008  | -0.0023 | 0.0045  | -0.0732     | 0.0299  | 0.0051  | 0.0314  | -0.0496     | 0.0095 | -0.0071 | 0.0179  | -0.1043                 | 0.0056  | -0.0353 | 0.0601  |
|          | NBI   | -0.0088     | 0.0161  | 0.0027  | 0.0125  | -0.0163     | 0.1470  | 0.0150  | 0.0499  | -0.0233     | 0.0934 | 0.0214  | 0.0240  | -0.0010                 | 0.0275  | 0.0086  | 0.0164  |
|          | DGCI  | -0.0272     | 0.0073  | -0.0078 | 0.0176  | -0.0179     | 0.1352  | 0.0243  | 0.0462  | -0.0383     | 0.0841 | 0.0217  | 0.0312  | -0.0748                 | 0.0467  | 0.0041  | 0.0685  |
|          | GRVI  | -0.0076     | 0.0073  | -0.0001 | 0.0075  | -0.1797     | 0.0297  | -0.0151 | 0.0635  | -0.0749     | 0.1081 | -0.0037 | 0.0438  | -0.0799                 | 0.0685  | -0.0012 | 0.0747  |
|          | IKAW  | -0.0244     | 0.0256  | -0.0001 | 0.0250  | -0.0921     | -0.0077 | -0.0408 | 0.0322  | -0.0589     | 0.1022 | -0.0155 | 0.0449  | -0.2564                 | 0.3297  | 0.0454  | 0.2934  |
|          | IPCA  | -0.0441     | 0.0310  | -0.0059 | 0.0376  | -0.0753     | 0.1047  | -0.0062 | 0.0542  | -0.0640     | 0.0789 | 0.0061  | 0.0399  | -0.1977                 | 0.0606  | -0.0773 | 0.1301  |
|          | CLA   | -0.0859     | 0.0611  | 0.0053  | 0.0797  | -0.0606     | 0.3716  | 0.0894  | 0.1358  | -0.0186     | 1.0419 | 0.3163  | 0.3157  | -0.1042                 | 0.1314  | 0.0266  | 0.1199  |
|          | CR    | -0.0047     | 0.0413  | 0.0196  | 0.0231  | -0.0256     | 0.0724  | 0.0141  | 0.0296  | -0.0403     | 0.1409 | 0.0329  | 0.0464  | -0.0706                 | 0.0374  | -0.0125 | 0.0545  |
|          | CG    | -0.0829     | -0.0003 | -0.0310 | 0.0452  | -0.0400     | 0.0363  | -0.0047 | 0.0208  | -0.0444     | 0.1259 | 0.0156  | 0.0438  | -0.0997                 | -0.0044 | -0.0368 | 0.0544  |
|          | CB    | -0.0198     | 0.0934  | 0.0371  | 0.0566  | -0.0578     | 0.0949  | 0.0269  | 0.0509  | -0.0902     | 0.1020 | 0.0244  | 0.0543  | -0.0847                 | 0.0507  | -0.0016 | 0.0728  |
| P1'      | LW    | -0.1283     | 0.1748  | 0.0254  | 0.0600  | -0.1383     | 0.0945  | 0.0028  | 0.0440  | -0.1207     | 0.1335 | 0.0003  | 0.0507  | -0.1324                 | 0.1192  | 0.0020  | 0.0647  |

| Data set | Index | N treatment |        |         |         | P treatment |         |         |         | K treatment |        |         |         | Normal nutrition supply |         |         |         |
|----------|-------|-------------|--------|---------|---------|-------------|---------|---------|---------|-------------|--------|---------|---------|-------------------------|---------|---------|---------|
|          |       | Min         | Max    | Mean    | Std.dev | Min         | Max     | Mean    | Std.dev | Min         | Max    | Mean    | Std.dev | Min                     | Max     | Mean    | Std.dev |
|          | LL    | -0.0141     | 0.1148 | 0.0035  | 0.0205  | -0.0091     | 0.0864  | 0.0036  | 0.0158  | -0.0233     | 0.0259 | 0.0003  | 0.0062  | -0.1152                 | 0.0005  | -0.0122 | 0.0362  |
|          | LA    | -0.0384     | 0.1995 | 0.0058  | 0.0354  | -0.0882     | 0.1436  | 0.0018  | 0.0319  | -0.0576     | 0.0184 | -0.0033 | 0.0123  | -0.1290                 | 0.0179  | -0.0116 | 0.0419  |
|          | LP    | -0.0075     | 0.1097 | 0.0056  | 0.0193  | -0.0095     | 0.0868  | 0.0061  | 0.0154  | -0.0185     | 0.0266 | 0.0017  | 0.0063  | -0.1088                 | 0.0069  | -0.0105 | 0.0348  |
|          | EC    | -0.0001     | 0.0001 | 0.0000  | 0.0000  | -0.0001     | 0.0002  | 0.0000  | 0.0000  | -0.0001     | 0.0002 | 0.0000  | 0.0000  | 0.0000                  | 0.0000  | 0.0000  | 0.0000  |
|          | RE    | -0.1514     | 0.1280 | -0.0270 | 0.0582  | -0.1354     | 0.1335  | -0.0046 | 0.0531  | -0.1341     | 0.1122 | -0.0039 | 0.0524  | -0.1178                 | 0.1477  | -0.0014 | 0.0693  |
|          | AC    | -0.1267     | 0.1113 | -0.0136 | 0.0405  | -0.1092     | 0.1155  | -0.0066 | 0.0368  | -0.0872     | 0.1077 | 0.0033  | 0.0375  | -0.0070                 | 0.0874  | 0.0133  | 0.0280  |
|          | CI    | -0.1287     | 0.1802 | 0.0218  | 0.0600  | -0.1388     | 0.0954  | -0.0007 | 0.0469  | -0.1199     | 0.1357 | 0.0000  | 0.0506  | -0.1283                 | 0.1657  | 0.0142  | 0.0814  |
|          | FF    | -0.1057     | 0.0234 | -0.0076 | 0.0262  | -0.0879     | 0.0667  | -0.0104 | 0.0252  | -0.0695     | 0.0146 | -0.0068 | 0.0160  | -0.0168                 | 0.0885  | 0.0094  | 0.0314  |
|          | R     | -0.1205     | 0.1411 | 0.0494  | 0.0571  | -0.0167     | 0.1267  | 0.0322  | 0.0316  | -0.0046     | 0.0958 | 0.0434  | 0.0258  | -0.0157                 | 0.0601  | 0.0269  | 0.0269  |
|          | G     | -0.1152     | 0.0392 | 0.0035  | 0.0305  | -0.0259     | 0.0366  | 0.0074  | 0.0146  | -0.0083     | 0.0433 | 0.0124  | 0.0129  | -0.0227                 | 0.0389  | 0.0088  | 0.0163  |
|          | B     | -0.0732     | 0.2898 | 0.0521  | 0.0754  | -0.0539     | 0.1691  | 0.0191  | 0.0471  | -0.0904     | 0.1566 | 0.0245  | 0.0584  | -0.0621                 | 0.0561  | -0.0044 | 0.0431  |
|          | H     | -0.0126     | 0.0024 | -0.0035 | 0.0038  | -0.0091     | 0.0018  | -0.0020 | 0.0019  | -0.0043     | 0.0018 | -0.0015 | 0.0012  | -0.0030                 | -0.0003 | -0.0016 | 0.0010  |
|          | S     | -0.0138     | 0.0068 | -0.0020 | 0.0045  | -0.0098     | 0.0049  | -0.0016 | 0.0035  | -0.0078     | 0.0066 | -0.0004 | 0.0031  | -0.0035                 | 0.0081  | 0.0005  | 0.0035  |
|          | BR    | -0.1133     | 0.0803 | 0.0197  | 0.0369  | -0.0213     | 0.0593  | 0.0147  | 0.0182  | -0.0033     | 0.0645 | 0.0207  | 0.0160  | -0.0220                 | 0.0418  | 0.0091  | 0.0198  |
|          | NRI   | -0.0142     | 0.0604 | 0.0209  | 0.0185  | -0.0019     | 0.0498  | 0.0137  | 0.0116  | -0.0039     | 0.0407 | 0.0178  | 0.0113  | -0.0043                 | 0.0404  | 0.0152  | 0.0134  |
|          | NGI   | -0.0769     | 0.0058 | -0.0250 | 0.0215  | -0.0533     | 0.0877  | -0.0006 | 0.0311  | -0.0429     | 0.0064 | -0.0132 | 0.0118  | -0.0206                 | 0.0016  | -0.0076 | 0.0084  |
|          | NBI   | -0.0514     | 0.1737 | 0.0236  | 0.0490  | -0.0731     | 0.0198  | -0.0098 | 0.0189  | -0.1049     | 0.1081 | -0.0011 | 0.0449  | -0.0524                 | 0.0666  | -0.0011 | 0.0356  |
|          | DGCI  | -0.1147     | 0.0812 | 0.0201  | 0.0374  | -0.0216     | 0.0600  | 0.0150  | 0.0185  | -0.0033     | 0.0653 | 0.0210  | 0.0163  | -0.0223                 | 0.0424  | 0.0092  | 0.0201  |
|          | GRVI  | -0.3454     | 0.0190 | -0.1382 | 0.1150  | -0.3328     | -0.0013 | -0.0699 | 0.0792  | -0.1851     | 0.0019 | -0.0854 | 0.0502  | -0.1404                 | 0.0103  | -0.0588 | 0.0506  |
|          | IKAW  | -0.1316     | 0.0747 | -0.0137 | 0.0521  | -0.0389     | 0.0992  | 0.0121  | 0.0313  | -0.1178     | 0.1158 | 0.0083  | 0.0461  | -0.0363                 | 0.0738  | 0.0167  | 0.0381  |
|          | IPCA  | -0.2236     | 0.0380 | -0.0132 | 0.0554  | -0.0367     | 0.0854  | 0.0133  | 0.0251  | -0.0705     | 0.0435 | 0.0057  | 0.0274  | -0.0157                 | 0.0610  | 0.0036  | 0.0236  |
|          | CLA   | -0.0567     | 1.2734 | 0.3426  | 0.2784  | -0.1628     | 1.2827  | 0.6233  | 0.4085  | -0.3562     | 1.2104 | 0.7341  | 0.4149  | 0.0010                  | 0.4598  | 0.2917  | 0.1591  |
|          | CR    | -0.0288     | 0.2977 | 0.0654  | 0.0678  | -0.0335     | 0.1040  | 0.0412  | 0.0386  | -0.0835     | 0.1213 | 0.0259  | 0.0502  | -0.0214                 | 0.1260  | 0.0402  | 0.0472  |
|          | CG    | -0.0832     | 0.2326 | 0.0302  | 0.0548  | -0.0844     | 0.1055  | -0.0052 | 0.0370  | -0.1924     | 0.0268 | -0.0297 | 0.0438  | -0.0198                 | 0.0901  | 0.0203  | 0.0324  |
|          | CB    | -0.1224     | 0.2105 | 0.0173  | 0.0741  | -0.1581     | 0.1422  | 0.0414  | 0.0683  | -0.0980     | 0.1898 | 0.0584  | 0.0758  | -0.0861                 | 0.0323  | -0.0332 | 0.0417  |
| P2'      | LW    | -0.1435     | 0.1797 | 0.0217  | 0.0798  | -0.1407     | 0.0927  | -0.0024 | 0.0522  | -0.0862     | 0.1493 | 0.0180  | 0.0619  | -0.0769                 | 0.1429  | 0.0073  | 0.0576  |
|          | LL    | -0.0015     | 0.0033 | 0.0002  | 0.0011  | -0.0018     | 0.0055  | 0.0004  | 0.0016  | -0.0094     | 0.0020 | -0.0008 | 0.0023  | -0.0001                 | 0.0680  | 0.0138  | 0.0284  |
|          | LA    | -0.0466     | 0.0070 | -0.0124 | 0.0143  | -0.1333     | 0.0129  | -0.0113 | 0.0265  | -0.1327     | 0.0161 | -0.0091 | 0.0240  | -0.0149                 | 0.0689  | 0.0051  | 0.0248  |
|          | LP    | -0.0148     | 0.0024 | -0.0037 | 0.0039  | -0.0112     | 0.0007  | -0.0036 | 0.0029  | -0.0169     | 0.0009 | -0.0043 | 0.0034  | -0.0120                 | 0.0693  | 0.0091  | 0.0312  |
|          | EC    | -0.0001     | 0.0001 | 0.0000  | 0.0000  | -0.0001     | 0.0001  | 0.0000  | 0.0000  | -0.0001     | 0.0001 | 0.0000  | 0.0000  | -0.0001                 | 0.0000  | 0.0000  | 0.0000  |
|          | RE    | -0.1857     | 0.1201 | -0.0343 | 0.0804  | -0.1532     | 0.1332  | -0.0093 | 0.0583  | -0.1527     | 0.0842 | -0.0264 | 0.0598  | -0.1494                 | 0.0724  | -0.0047 | 0.0577  |

| Data set | Index | N treatment |        |         |         | P treatment |        |         |         | K treatment |        |         |         | Normal nutrition supply |        |         |         |
|----------|-------|-------------|--------|---------|---------|-------------|--------|---------|---------|-------------|--------|---------|---------|-------------------------|--------|---------|---------|
|          |       | Min         | Max    | Mean    | Std.dev | Min         | Max    | Mean    | Std.dev | Min         | Max    | Mean    | Std.dev | Min                     | Max    | Mean    | Std.dev |
|          | AC    | -0.1749     | 0.0616 | -0.0285 | 0.0575  | -0.1629     | 0.0879 | -0.0078 | 0.0467  | -0.1231     | 0.0572 | -0.0257 | 0.0467  | -0.1112                 | 0.0071 | -0.0192 | 0.0339  |
|          | CI    | -0.1453     | 0.1768 | 0.0215  | 0.0803  | -0.1411     | 0.0929 | -0.0028 | 0.0525  | -0.0866     | 0.1504 | 0.0188  | 0.0620  | -0.0919                 | 0.1430 | -0.0066 | 0.0650  |
|          | FF    | -0.0503     | 0.0180 | -0.0051 | 0.0182  | -0.1216     | 0.0167 | -0.0041 | 0.0256  | -0.1169     | 0.0318 | -0.0005 | 0.0238  | -0.0644                 | 0.0232 | -0.0018 | 0.0247  |
|          | R     | -0.0108     | 0.0910 | 0.0330  | 0.0231  | -0.0173     | 0.1563 | 0.0461  | 0.0294  | -0.0337     | 0.1238 | 0.0518  | 0.0298  | -0.0461                 | 0.0635 | 0.0311  | 0.0323  |
|          | G     | -0.0225     | 0.0829 | 0.0043  | 0.0208  | -0.0259     | 0.0249 | 0.0051  | 0.0114  | -0.0335     | 0.0367 | 0.0038  | 0.0158  | -0.0268                 | 0.0269 | 0.0033  | 0.0141  |
|          | B     | 0.0013      | 0.2112 | 0.0878  | 0.0527  | 0.0168      | 0.2965 | 0.0978  | 0.0663  | -0.0799     | 0.2521 | 0.1208  | 0.0757  | -0.0847                 | 0.2122 | 0.0815  | 0.1018  |
|          | H     | -0.0063     | 0.0099 | -0.0001 | 0.0032  | -0.0156     | 0.0036 | -0.0029 | 0.0036  | -0.0124     | 0.0007 | -0.0028 | 0.0026  | -0.0055                 | 0.0004 | -0.0025 | 0.0017  |
|          | S     | -0.0126     | 0.0080 | -0.0007 | 0.0042  | -0.0153     | 0.0052 | -0.0033 | 0.0059  | -0.0148     | 0.0067 | -0.0039 | 0.0059  | -0.0105                 | 0.0042 | -0.0022 | 0.0055  |
|          | BR    | -0.0058     | 0.0847 | 0.0166  | 0.0177  | -0.0070     | 0.0747 | 0.0202  | 0.0150  | -0.0368     | 0.0695 | 0.0219  | 0.0199  | -0.0340                 | 0.0317 | 0.0108  | 0.0181  |
|          | NRI   | -0.0191     | 0.0241 | 0.0044  | 0.0092  | -0.0126     | 0.0416 | 0.0120  | 0.0102  | -0.0079     | 0.0327 | 0.0134  | 0.0081  | -0.0041                 | 0.0236 | 0.0080  | 0.0114  |
|          | NGI   | -0.0677     | 0.0001 | -0.0244 | 0.0169  | -0.0254     | 0.1818 | 0.0546  | 0.0619  | -0.0737     | 0.0106 | -0.0346 | 0.0186  | -0.0553                 | 0.0152 | -0.0230 | 0.0243  |
|          | NBI   | -0.0104     | 0.1524 | 0.0591  | 0.0471  | -0.0899     | 0.0290 | -0.0198 | 0.0281  | -0.0357     | 0.1719 | 0.0824  | 0.0578  | -0.0676                 | 0.1865 | 0.0667  | 0.0886  |
|          | DGCI  | -0.0058     | 0.0856 | 0.0168  | 0.0179  | -0.0070     | 0.0758 | 0.0205  | 0.0153  | -0.0373     | 0.0704 | 0.0222  | 0.0202  | -0.0345                 | 0.0321 | 0.0110  | 0.0183  |
|          | GRVI  | -0.2714     | 0.0418 | -0.0849 | 0.0682  | -0.3876     | 0.0451 | -0.1204 | 0.0756  | -0.3114     | 0.0117 | -0.1413 | 0.0703  | -0.2012                 | 0.0564 | -0.0871 | 0.0791  |
|          | IKAW  | -0.1187     | 0.0524 | -0.0514 | 0.0393  | -0.1266     | 0.0317 | -0.0486 | 0.0438  | -0.1259     | 0.0852 | -0.0555 | 0.0528  | -0.2723                 | 0.0912 | -0.0752 | 0.1143  |
|          | IPCA  | -0.1024     | 0.1356 | -0.0266 | 0.0428  | -0.1145     | 0.0289 | -0.0315 | 0.0360  | -0.1007     | 0.0608 | -0.0328 | 0.0394  | -0.1284                 | 0.0557 | -0.0352 | 0.0583  |
|          | CLA   | -0.0771     | 0.9243 | 0.2050  | 0.2480  | 0.0008      | 0.9905 | 0.2912  | 0.2541  | -0.0748     | 0.8481 | 0.2527  | 0.2054  | 0.0687                  | 0.5360 | 0.2512  | 0.1683  |
|          | CR    | -0.0199     | 0.1060 | 0.0248  | 0.0273  | -0.0316     | 0.0897 | 0.0300  | 0.0285  | -0.0131     | 0.1795 | 0.0530  | 0.0417  | -0.0242                 | 0.0432 | 0.0136  | 0.0206  |
|          | CG    | -0.0269     | 0.1145 | 0.0132  | 0.0300  | -0.0316     | 0.0819 | 0.0186  | 0.0275  | -0.0248     | 0.1951 | 0.0297  | 0.0455  | -0.0238                 | 0.0365 | 0.0113  | 0.0163  |
|          | CB    | -0.0565     | 0.1980 | 0.0509  | 0.0632  | -0.1019     | 0.1673 | 0.0356  | 0.0631  | -0.0109     | 0.1704 | 0.0648  | 0.0460  | -0.1541                 | 0.1387 | 0.0189  | 0.1032  |
| P3'      | LW    | -0.1431     | 0.1564 | -0.0193 | 0.0782  | -0.1062     | 0.1483 | 0.0113  | 0.0651  | -0.1204     | 0.0517 | -0.0088 | 0.0523  | -0.1047                 | 0.1719 | 0.0150  | 0.0873  |
|          | LL    | -0.0209     | 0.0611 | 0.0005  | 0.0173  | -0.0663     | 0.0359 | -0.0049 | 0.0164  | -0.0386     | 0.0055 | -0.0027 | 0.0091  | -0.1355                 | 0.0001 | -0.0205 | 0.0443  |
|          | LA    | -0.0839     | 0.1214 | -0.0067 | 0.0469  | -0.1950     | 0.0662 | -0.0276 | 0.0457  | -0.1792     | 0.0036 | -0.0267 | 0.0403  | -0.1473                 | 0.0040 | -0.0381 | 0.0476  |
|          | LP    | -0.0168     | 0.0603 | 0.0007  | 0.0171  | -0.0697     | 0.0401 | -0.0052 | 0.0173  | -0.0355     | 0.0063 | -0.0020 | 0.0088  | -0.1346                 | 0.0048 | -0.0198 | 0.0439  |
|          | EC    | -0.0001     | 0.0001 | 0.0000  | 0.0001  | -0.0002     | 0.0001 | 0.0000  | 0.0000  | -0.0003     | 0.0001 | 0.0000  | 0.0001  | -0.0001                 | 0.0001 | 0.0000  | 0.0000  |
|          | RE    | -0.1728     | 0.1361 | 0.0120  | 0.0805  | -0.3142     | 0.0986 | -0.0339 | 0.0821  | -0.2082     | 0.1214 | -0.0151 | 0.0744  | -0.2975                 | 0.0738 | -0.0511 | 0.1076  |
|          | AC    | -0.1487     | 0.1018 | 0.0053  | 0.0621  | -0.1951     | 0.0866 | -0.0293 | 0.0568  | -0.2088     | 0.1079 | -0.0190 | 0.0669  | -0.1792                 | 0.0608 | -0.0256 | 0.0679  |
|          | CI    | -0.1399     | 0.1594 | -0.0198 | 0.0840  | -0.1046     | 0.1774 | 0.0162  | 0.0639  | -0.1238     | 0.0673 | -0.0060 | 0.0515  | -0.1039                 | 0.1935 | 0.0355  | 0.0836  |
|          | FF    | -0.0851     | 0.0425 | -0.0081 | 0.0308  | -0.1478     | 0.0800 | -0.0172 | 0.0411  | -0.1802     | 0.0515 | -0.0227 | 0.0453  | -0.1069                 | 0.0641 | -0.0171 | 0.0441  |
|          | R     | -0.0259     | 0.1415 | 0.0336  | 0.0519  | -0.0131     | 0.1381 | 0.0581  | 0.0451  | -0.0489     | 0.1249 | 0.0482  | 0.0427  | 0.0414                  | 0.1688 | 0.0834  | 0.0365  |



| Data set | Index | N treatment |        |         |         | P treatment |        |         |         | K treatment |        |         |         | Normal nutrition supply |         |         |         |
|----------|-------|-------------|--------|---------|---------|-------------|--------|---------|---------|-------------|--------|---------|---------|-------------------------|---------|---------|---------|
|          |       | Min         | Max    | Mean    | Std.dev | Min         | Max    | Mean    | Std.dev | Min         | Max    | Mean    | Std.dev | Min                     | Max     | Mean    | Std.dev |
|          | G     | -0.0101     | 0.0679 | 0.0116  | 0.0214  | -0.0138     | 0.0507 | 0.0109  | 0.0176  | -0.0434     | 0.0436 | 0.0075  | 0.0189  | 0.0076                  | 0.0734  | 0.0279  | 0.0213  |
|          | B     | -0.0198     | 0.1606 | 0.0416  | 0.0561  | -0.0091     | 0.1790 | 0.0671  | 0.0519  | -0.0320     | 0.1394 | 0.0653  | 0.0445  | 0.0519                  | 0.2733  | 0.1147  | 0.0743  |
|          | H     | -0.0102     | 0.0048 | -0.0019 | 0.0040  | -0.0172     | 0.0079 | -0.0040 | 0.0059  | -0.0215     | 0.0041 | -0.0053 | 0.0060  | -0.0135                 | 0.0068  | -0.0036 | 0.0062  |
|          | S     | -0.0075     | 0.0062 | -0.0012 | 0.0036  | -0.0065     | 0.0098 | 0.0007  | 0.0042  | -0.0239     | 0.0096 | -0.0023 | 0.0065  | -0.0074                 | 0.0046  | -0.0013 | 0.0041  |
|          | BR    | -0.0105     | 0.0877 | 0.0208  | 0.0318  | -0.0094     | 0.0805 | 0.0296  | 0.0243  | -0.0445     | 0.0726 | 0.0245  | 0.0255  | 0.0226                  | 0.1123  | 0.0527  | 0.0273  |
|          | NRI   | -0.0187     | 0.0343 | 0.0069  | 0.0145  | -0.0050     | 0.0423 | 0.0169  | 0.0161  | -0.0094     | 0.0373 | 0.0122  | 0.0142  | -0.0082                 | 0.0495  | 0.0129  | 0.0183  |
|          | NGI   | -0.0575     | 0.0030 | -0.0151 | 0.0224  | -0.0316     | 0.1024 | 0.0170  | 0.0305  | -0.0640     | 0.0050 | -0.0285 | 0.0201  | -0.0730                 | -0.0126 | -0.0383 | 0.0193  |
|          | NBI   | -0.0117     | 0.0570 | 0.0149  | 0.0211  | -0.0740     | 0.0607 | -0.0214 | 0.0349  | -0.0172     | 0.0594 | 0.0293  | 0.0181  | -0.0398                 | 0.1269  | 0.0582  | 0.0504  |
|          | DGCI  | -0.0106     | 0.0888 | 0.0210  | 0.0322  | -0.0095     | 0.0817 | 0.0300  | 0.0246  | -0.0450     | 0.0736 | 0.0249  | 0.0258  | 0.0228                  | 0.1137  | 0.0534  | 0.0277  |
|          | GRVI  | -0.2706     | 0.0576 | -0.0655 | 0.1079  | -0.3123     | 0.0204 | -0.1409 | 0.1196  | -0.3010     | 0.0311 | -0.1213 | 0.1007  | -0.2833                 | -0.0127 | -0.1511 | 0.0915  |
|          | IKAW  | -0.0744     | 0.0226 | -0.0114 | 0.0244  | -0.0835     | 0.0318 | -0.0108 | 0.0264  | -0.0796     | 0.0170 | -0.0258 | 0.0228  | -0.2433                 | 0.1208  | -0.0997 | 0.1037  |
|          | IPCA  | -0.0313     | 0.0913 | 0.0151  | 0.0318  | -0.0555     | 0.0739 | 0.0162  | 0.0279  | -0.0679     | 0.0950 | 0.0021  | 0.0380  | -0.1294                 | 0.0835  | -0.0338 | 0.0640  |
|          | CLA   | -0.0224     | 0.4802 | 0.1563  | 0.1681  | -0.0532     | 0.7743 | 0.2870  | 0.2336  | -0.0324     | 0.5696 | 0.2319  | 0.1865  | -0.0800                 | 0.6840  | 0.3231  | 0.2727  |
|          | CR    | -0.0153     | 0.1146 | 0.0289  | 0.0484  | -0.0407     | 0.0930 | 0.0295  | 0.0442  | -0.0528     | 0.0935 | 0.0172  | 0.0381  | -0.0147                 | 0.0830  | 0.0344  | 0.0321  |
|          | CG    | -0.0205     | 0.0585 | 0.0070  | 0.0269  | -0.0440     | 0.0339 | 0.0039  | 0.0168  | -0.0519     | 0.0336 | -0.0030 | 0.0194  | -0.0267                 | 0.0600  | 0.0060  | 0.0278  |
|          | CB    | -0.0146     | 0.1014 | 0.0272  | 0.0399  | -0.1347     | 0.1440 | 0.0082  | 0.0562  | -0.0683     | 0.0831 | 0.0152  | 0.0355  | 0.0117                  | 0.0750  | 0.0430  | 0.0311  |
