# Supplementary material
Source: MDPI journal article supplement (https://www.mdpi.com/2071-1050/10/3/762)
Supplement: s1 [file s1]

**Table S2: Summary of descriptive analysis for RGR of different indices in the 1<sup>st</sup> fully expanded leaf.** RGR: relative growth rate. Min represents minimum value, Max represents maximum value, Mean represents the average value, Std.dev represents standard deviation. P1 represents data set calculated with 3-day intervals from DAT20 to DAT23, by that analogy, we calculated P2 to P7 data sets. P1' represents data set calculated with 6-day intervals from DAT20 to DAT26, by that analogy, we calculated P2' and P3' data sets

| Data set | Index | N treatment |        |         |         | P treatment |        |         |         | K treatment |        |         |         | Normal nutrition supply |        |         |         |
|----------|-------|-------------|--------|---------|---------|-------------|--------|---------|---------|-------------|--------|---------|---------|-------------------------|--------|---------|---------|
|          |       | Min         | Max    | Mean    | Std.dev | Min         | Max    | Mean    | Std.dev | Min         | Max    | Mean    | Std.dev | Min                     | Max    | Mean    | Std.dev |
| P1       | LW    | -0.1501     | 0.2587 | 0.0145  | 0.0609  | -1.2614     | 0.1476 | -0.0072 | 0.2074  | -0.1272     | 0.3097 | 0.0283  | 0.0785  | -1.3535                 | 0.0991 | -0.1056 | 0.4401  |
|          | LL    | -0.1255     | 0.0968 | 0.0046  | 0.0333  | -1.5706     | 0.1069 | -0.0170 | 0.2474  | -1.0085     | 0.0992 | -0.0012 | 0.1618  | -1.6513                 | 0.0546 | -0.1520 | 0.5272  |
|          | LA    | -0.1446     | 0.1796 | 0.0076  | 0.0506  | -2.9088     | 0.1524 | -0.0438 | 0.4546  | -1.8680     | 0.1381 | -0.0165 | 0.2954  | -0.0043                 | 0.0697 | 0.0211  | 0.0282  |
|          | LP    | -0.1275     | 0.1021 | 0.0065  | 0.0351  | -1.5908     | 0.1098 | -0.0148 | 0.2510  | -1.0148     | 0.1002 | -0.0004 | 0.1629  | -1.6653                 | 0.0544 | -0.1536 | 0.5316  |
|          | EC    | -0.0002     | 0.0002 | 0.0000  | 0.0000  | -0.0005     | 0.0002 | 0.0000  | 0.0001  | -0.0006     | 0.0002 | 0.0000  | 0.0001  | -0.0006                 | 0.0000 | -0.0001 | 0.0002  |
|          | RE    | -0.2562     | 0.1596 | -0.0107 | 0.0620  | -0.1273     | 0.1089 | -0.0196 | 0.0595  | -0.3041     | 0.1298 | -0.0290 | 0.0799  | -0.0870                 | 0.0266 | -0.0264 | 0.0394  |
|          | AC    | -0.0611     | 0.1411 | 0.0024  | 0.0402  | -0.1115     | 0.1211 | -0.0025 | 0.0442  | -0.1700     | 0.0931 | -0.0102 | 0.0470  | -0.0520                 | 0.0049 | -0.0179 | 0.0190  |
|          | CI    | -0.1407     | 0.2631 | 0.0099  | 0.0666  | -0.1088     | 0.3092 | 0.0098  | 0.0771  | -0.1417     | 0.3450 | 0.0149  | 0.0958  | -0.0431                 | 0.2978 | 0.0464  | 0.0957  |
|          | FF    | -0.0536     | 0.1122 | -0.0046 | 0.0279  | -0.0850     | 0.2728 | -0.0142 | 0.0526  | -0.0778     | 0.1616 | -0.0157 | 0.0370  | -0.0421                 | 0.3002 | 0.0231  | 0.0990  |
|          | R     | -0.1177     | 0.2106 | 0.0233  | 0.0488  | -0.0879     | 0.1838 | 0.0768  | 0.0656  | -0.0983     | 0.1151 | 0.0051  | 0.0418  | -0.0086                 | 0.0936 | 0.0229  | 0.0343  |
|          | G     | -0.0502     | 0.0881 | 0.0093  | 0.0218  | -0.0248     | 0.0803 | 0.0256  | 0.0306  | -0.0464     | 0.0443 | -0.0020 | 0.0158  | -0.0385                 | 0.0116 | -0.0057 | 0.0168  |
|          | B     | -0.4519     | 0.1448 | -0.0289 | 0.1053  | -0.3775     | 0.2254 | 0.0160  | 0.1226  | -0.1542     | 0.2643 | 0.0055  | 0.0786  | -0.0973                 | 0.1897 | 0.0101  | 0.0834  |
|          | H     | -0.0107     | 0.0042 | -0.0010 | 0.0022  | -0.0044     | 0.0021 | -0.0009 | 0.0012  | -0.0026     | 0.0043 | -0.0005 | 0.0018  | -0.0021                 | 0.0042 | 0.0002  | 0.0018  |
|          | S     | -0.0043     | 0.0045 | 0.0008  | 0.0023  | -0.0102     | 0.0150 | 0.0023  | 0.0037  | -0.0117     | 0.0188 | 0.0007  | 0.0044  | -0.0178                 | 0.0070 | -0.0016 | 0.0065  |
|          | BR    | -0.0721     | 0.1137 | 0.0116  | 0.0280  | -0.0496     | 0.1005 | 0.0365  | 0.0380  | -0.0563     | 0.0644 | -0.0003 | 0.0215  | -0.0278                 | 0.0322 | -0.0008 | 0.0182  |
|          | NRI   | -0.0344     | 0.0878 | 0.0128  | 0.0193  | -0.0022     | 0.0733 | 0.0358  | 0.0237  | -0.0385     | 0.0333 | 0.0045  | 0.0172  | -0.0451                 | 0.0411 | 0.0028  | 0.0210  |
|          | NGI   | -0.0346     | 0.0656 | -0.0012 | 0.0147  | -0.2919     | 0.1490 | -0.0243 | 0.1012  | -0.0430     | 0.0305 | -0.0026 | 0.0130  | -0.0206                 | 0.0255 | 0.0005  | 0.0119  |
|          | NBI   | -0.3434     | 0.1107 | -0.0394 | 0.0936  | -0.0500     | 0.0638 | -0.0162 | 0.0220  | -0.1132     | 0.1770 | 0.0049  | 0.0623  | -0.1975                 | 0.1629 | -0.0093 | 0.0877  |
|          | DGCI  | -0.0730     | 0.1159 | 0.0118  | 0.0285  | -0.0504     | 0.1023 | 0.0372  | 0.0387  | -0.0574     | 0.0655 | -0.0003 | 0.0219  | -0.0285                 | 0.0328 | -0.0008 | 0.0186  |
|          | GRVI  | -0.2181     | 0.2152 | -0.0308 | 0.0618  | -0.1851     | 0.2045 | -0.0884 | 0.0701  | -0.1107     | 0.0748 | -0.0167 | 0.0431  | -0.0578                 | 0.0669 | -0.0002 | 0.0398  |
|          | IKAW  | -0.0553     | 0.1839 | 0.0360  | 0.0533  | -0.0813     | 0.1921 | 0.0451  | 0.0635  | -0.1099     | 0.0784 | 0.0072  | 0.0475  | -0.1373                 | 0.1388 | -0.0053 | 0.0726  |
|          | IPCA  | -0.0403     | 0.1051 | 0.0181  | 0.0272  | -0.0503     | 0.0897 | 0.0307  | 0.0395  | -0.0534     | 0.0268 | -0.0021 | 0.0184  | -0.0552                 | 0.0420 | -0.0020 | 0.0271  |
| P2       | LW    | -0.2524     | 0.2674 | -0.0001 | 0.0802  | -0.7324     | 1.4662 | 0.0072  | 0.2647  | -0.1462     | 0.2377 | 0.0110  | 0.0861  | -0.0536                 | 1.2614 | 0.1503  | 0.3936  |
|          | LL    | -0.0155     | 0.1000 | 0.0119  | 0.0247  | -1.6078     | 1.6905 | 0.0166  | 0.3651  | -0.1299     | 1.2590 | 0.0364  | 0.1950  | -0.0501                 | 1.6900 | 0.1680  | 0.5351  |
|          | LA    | -0.0155     | 0.1624 | 0.0167  | 0.0374  | -2.6204     | 3.0778 | 0.0244  | 0.6316  | -0.0082     | 2.3197 | 0.0622  | 0.3570  | -0.1200                 | 0.0090 | -0.0111 | 0.0388  |
|          | LP    | -0.0271     | 0.1044 | 0.0097  | 0.0252  | -1.5670     | 1.7115 | 0.0166  | 0.3631  | -0.1383     | 1.2709 | 0.0374  | 0.1968  | -0.0489                 | 1.6968 | 0.1683  | 0.5374  |
|          | EC    | -0.0001     | 0.0001 | 0.0000  | 0.0000  | -0.0033     | 0.0004 | -0.0001 | 0.0005  | -0.0002     | 0.0008 | 0.0000  | 0.0001  | -0.0001                 | 0.0007 | 0.0001  | 0.0002  |
|          | RE    | -0.2743     | 0.2486 | 0.0040  | 0.0843  | -0.2802     | 0.1453 | 0.0006  | 0.0811  | -0.2480     | 0.1897 | -0.0126 | 0.0903  | -0.1261                 | 0.1198 | -0.0212 | 0.0654  |

| Data set | Index | N treatment |         |         |         | P treatment |        |         |         | K treatment |        |         |         | Normal nutrition supply |         |         |         |
|----------|-------|-------------|---------|---------|---------|-------------|--------|---------|---------|-------------|--------|---------|---------|-------------------------|---------|---------|---------|
|          |       | Min         | Max     | Mean    | Std.dev | Min         | Max    | Mean    | Std.dev | Min         | Max    | Mean    | Std.dev | Min                     | Max     | Mean    | Std.dev |
|          | AC    | -0.0937     | 0.0580  | -0.0035 | 0.0315  | -0.1423     | 0.1080 | -0.0125 | 0.0491  | -0.1378     | 0.1513 | -0.0084 | 0.0521  | -0.0841                 | 0.0867  | -0.0114 | 0.0436  |
|          | CI    | -0.2562     | 0.2422  | -0.0119 | 0.0851  | -0.2243     | 0.8754 | -0.0094 | 0.1590  | -0.3879     | 0.2135 | -0.0050 | 0.1076  | -0.4286                 | 0.1309  | -0.0176 | 0.1508  |
|          | FF    | -0.0647     | 0.0501  | -0.0036 | 0.0219  | -0.3452     | 0.5135 | -0.0087 | 0.1000  | -0.2220     | 0.0143 | -0.0196 | 0.0380  | -0.3224                 | 0.0079  | -0.0394 | 0.1001  |
|          | R     | -0.0153     | 0.1960  | 0.0591  | 0.0551  | -0.1813     | 0.0449 | -0.0561 | 0.0647  | -0.0327     | 0.1217 | 0.0415  | 0.0344  | 0.0262                  | 0.1155  | 0.0510  | 0.0310  |
|          | G     | -0.0393     | 0.0555  | 0.0123  | 0.0227  | -0.0874     | 0.0252 | -0.0201 | 0.0293  | -0.0257     | 0.0392 | 0.0112  | 0.0158  | -0.0161                 | 0.0189  | 0.0067  | 0.0108  |
|          | B     | -0.1148     | 0.3908  | 0.0814  | 0.1144  | -0.2259     | 0.2856 | -0.0146 | 0.1098  | -0.1513     | 0.3242 | 0.0367  | 0.0900  | 0.0305                  | 0.4141  | 0.2063  | 0.1658  |
|          | H     | -0.0127     | -0.0001 | -0.0037 | 0.0035  | -0.0062     | 0.0060 | -0.0010 | 0.0021  | -0.0059     | 0.0030 | -0.0013 | 0.0021  | -0.0035                 | -0.0006 | -0.0020 | 0.0012  |
|          | S     | -0.0195     | 0.0058  | -0.0028 | 0.0049  | -0.0247     | 0.0119 | -0.0033 | 0.0076  | -0.0177     | 0.0059 | -0.0031 | 0.0054  | -0.0082                 | 0.0186  | 0.0016  | 0.0068  |
|          | BR    | -0.0308     | 0.0831  | 0.0259  | 0.0293  | -0.1074     | 0.0326 | -0.0277 | 0.0370  | -0.0237     | 0.0533 | 0.0189  | 0.0190  | -0.0060                 | 0.0379  | 0.0143  | 0.0161  |
|          | NRI   | -0.0131     | 0.0858  | 0.0230  | 0.0217  | -0.0793     | 0.0150 | -0.0250 | 0.0263  | -0.0180     | 0.0503 | 0.0167  | 0.0165  | 0.0042                  | 0.0458  | 0.0202  | 0.0158  |
|          | NGI   | -0.1341     | 0.0027  | -0.0238 | 0.0247  | -0.1731     | 0.2669 | 0.0132  | 0.0921  | -0.0558     | 0.0110 | -0.0136 | 0.0128  | -0.0419                 | 0.0053  | -0.0147 | 0.0137  |
|          | NBI   | -0.1235     | 0.2935  | 0.0453  | 0.0894  | -0.0250     | 0.0445 | 0.0142  | 0.0176  | -0.1782     | 0.2615 | 0.0119  | 0.0767  | -0.1014                 | 0.1366  | 0.0119  | 0.0677  |
|          | DGCI  | -0.0313     | 0.0841  | 0.0263  | 0.0297  | -0.1092     | 0.0331 | -0.0282 | 0.0377  | -0.0242     | 0.0544 | 0.0193  | 0.0194  | -0.0061                 | 0.0386  | 0.0146  | 0.0163  |
|          | GRVI  | -0.2765     | -0.0019 | -0.1110 | 0.0784  | -0.0931     | 0.1818 | 0.0570  | 0.0808  | -0.3074     | 0.0126 | -0.0660 | 0.0613  | -0.1128                 | 0.0175  | -0.0499 | 0.0464  |
|          | IKAW  | -0.1089     | 0.0747  | -0.0120 | 0.0486  | -0.2348     | 0.0882 | -0.0274 | 0.0682  | -0.2629     | 0.1629 | -0.0032 | 0.0675  | -0.0422                 | 0.1045  | 0.0207  | 0.0507  |
|          | IPCA  | -0.0936     | 0.0409  | -0.0010 | 0.0295  | -0.1102     | 0.0484 | -0.0248 | 0.0341  | -0.0924     | 0.0647 | 0.0003  | 0.0291  | -0.0238                 | 0.0357  | 0.0065  | 0.0167  |
| P3       | LW    | -0.2265     | 0.1089  | -0.0164 | 0.0651  | -0.2924     | 0.7539 | 0.0077  | 0.1486  | -0.2271     | 0.1352 | -0.0170 | 0.0776  | -0.1644                 | 0.1635  | -0.0310 | 0.0958  |
|          | LL    | -0.0024     | 0.0366  | 0.0034  | 0.0087  | -0.0948     | 1.6082 | 0.0399  | 0.2551  | -0.0070     | 0.1391 | 0.0050  | 0.0238  | -0.0004                 | 0.0494  | 0.0063  | 0.0153  |
|          | LA    | -0.0118     | 0.0278  | 0.0015  | 0.0080  | -0.0771     | 2.6140 | 0.0653  | 0.4136  | -0.0101     | 0.0874 | 0.0023  | 0.0144  | -0.0071                 | 0.1162  | 0.0101  | 0.0375  |
|          | LP    | -0.0235     | 0.0268  | -0.0065 | 0.0115  | -0.0525     | 1.5595 | 0.0318  | 0.2481  | -0.0257     | 0.1309 | -0.0048 | 0.0255  | -0.0148                 | 0.0474  | -0.0021 | 0.0178  |
|          | EC    | -0.0001     | 0.0001  | 0.0000  | 0.0000  | -0.0001     | 0.0033 | 0.0001  | 0.0005  | -0.0001     | 0.0001 | 0.0000  | 0.0000  | 0.0000                  | 0.0002  | 0.0000  | 0.0001  |
|          | RE    | -0.1350     | 0.2242  | 0.0145  | 0.0665  | -0.2219     | 0.2850 | 0.0115  | 0.0879  | -0.1343     | 0.2344 | 0.0225  | 0.0806  | -0.0967                 | 0.1613  | 0.0348  | 0.0800  |
|          | AC    | -0.0786     | 0.0811  | 0.0003  | 0.0296  | -0.1708     | 0.1388 | 0.0056  | 0.0535  | -0.0739     | 0.0938 | 0.0075  | 0.0404  | -0.0493                 | 0.1289  | 0.0166  | 0.0475  |
|          | CI    | -0.2275     | 0.0979  | -0.0198 | 0.0650  | -0.8543     | 0.2195 | -0.0322 | 0.1569  | -0.2293     | 0.1355 | -0.0232 | 0.0799  | -0.1650                 | 0.1141  | -0.0373 | 0.0867  |
|          | FF    | -0.0386     | 0.0430  | 0.0145  | 0.0187  | -0.5049     | 0.0334 | 0.0006  | 0.0836  | -0.0526     | 0.0553 | 0.0190  | 0.0170  | 0.0003                  | 0.0288  | 0.0143  | 0.0093  |
|          | R     | -0.0284     | 0.0900  | 0.0322  | 0.0293  | 0.0097      | 0.1253 | 0.0579  | 0.0313  | -0.0595     | 0.1316 | 0.0556  | 0.0453  | -0.0444                 | 0.0460  | 0.0025  | 0.0301  |
|          | G     | -0.0492     | 0.0419  | -0.0008 | 0.0209  | -0.0244     | 0.0274 | 0.0027  | 0.0120  | -0.0238     | 0.0843 | 0.0083  | 0.0225  | -0.0174                 | 0.0217  | -0.0049 | 0.0132  |
|          | B     | -0.0041     | 0.4324  | 0.1867  | 0.1216  | -0.1197     | 0.4162 | 0.1962  | 0.1383  | -0.2733     | 0.4245 | 0.1961  | 0.1699  | -0.1962                 | -0.0354 | -0.0786 | 0.0616  |
|          | H     | -0.0096     | 0.0057  | -0.0009 | 0.0032  | -0.0050     | 0.0040 | -0.0007 | 0.0024  | -0.0061     | 0.0063 | 0.0001  | 0.0027  | -0.0027                 | 0.0043  | 0.0007  | 0.0022  |
|          | S     | -0.0392     | 0.0053  | -0.0169 | 0.0135  | -0.0462     | 0.0084 | -0.0176 | 0.0146  | -0.0377     | 0.0103 | -0.0143 | 0.0146  | -0.0390                 | 0.0128  | -0.0127 | 0.0187  |
|          | BR    | -0.0339     | 0.0502  | 0.0144  | 0.0204  | -0.0058     | 0.0525 | 0.0222  | 0.0152  | -0.0318     | 0.0996 | 0.0255  | 0.0272  | -0.0302                 | 0.0552  | 0.0157  | 0.0277  |

| Data set | Index | N treatment |         |         |         | P treatment |        |         |         | K treatment |        |         |         | Normal nutrition supply |        |         |         |
|----------|-------|-------------|---------|---------|---------|-------------|--------|---------|---------|-------------|--------|---------|---------|-------------------------|--------|---------|---------|
|          |       | Min         | Max     | Mean    | Std.dev | Min         | Max    | Mean    | Std.dev | Min         | Max    | Mean    | Std.dev | Min                     | Max    | Mean    | Std.dev |
|          | NRI   | -0.0370     | 0.0214  | -0.0032 | 0.0143  | -0.0180     | 0.0440 | 0.0121  | 0.0143  | -0.0298     | 0.0497 | 0.0083  | 0.0161  | -0.0124                 | 0.0325 | 0.0108  | 0.0152  |
|          | NGI   | -0.0734     | -0.0070 | -0.0362 | 0.0179  | -0.0361     | 0.3708 | 0.1459  | 0.1240  | -0.0793     | 0.0551 | -0.0391 | 0.0313  | -0.0686                 | 0.0378 | -0.0231 | 0.0418  |
|          | NBI   | -0.0032     | 0.3751  | 0.1513  | 0.1153  | -0.1071     | 0.0416 | -0.0387 | 0.0339  | -0.2091     | 0.3337 | 0.1488  | 0.1446  | -0.1456                 | 0.3538 | 0.1139  | 0.2046  |
|          | DGCI  | -0.0346     | 0.0505  | 0.0144  | 0.0207  | -0.0061     | 0.0533 | 0.0224  | 0.0155  | -0.0323     | 0.1006 | 0.0257  | 0.0276  | -0.0306                 | 0.0559 | 0.0158  | 0.0280  |
|          | GRVI  | -0.4204     | -0.0205 | -0.1285 | 0.0869  | -0.4920     | 0.0043 | -0.1481 | 0.0958  | -0.2824     | 0.3516 | -0.0917 | 0.0994  | -0.1606                 | 0.0808 | -0.0649 | 0.0826  |
|          | IKAW  | -0.3238     | 0.0248  | -0.1309 | 0.0980  | -0.2965     | 0.1875 | -0.1286 | 0.1212  | -0.3267     | 0.2260 | -0.1309 | 0.1510  | -0.2830                 | 0.1692 | -0.0864 | 0.2029  |
|          | IPCA  | -0.1512     | 0.0202  | -0.0697 | 0.0517  | -0.1377     | 0.0925 | -0.0616 | 0.0453  | -0.1263     | 0.1356 | -0.0447 | 0.0745  | -0.1091                 | 0.0861 | -0.0255 | 0.0840  |
| P4       | LW    | -0.1478     | 0.2233  | 0.0144  | 0.0737  | -0.1366     | 0.1394 | -0.0002 | 0.0597  | -0.2223     | 0.2198 | -0.0074 | 0.0704  | -0.0477                 | 0.1065 | 0.0261  | 0.0472  |
|          | LL    | -0.0038     | 0.0199  | 0.0003  | 0.0032  | -0.0081     | 0.0946 | 0.0076  | 0.0220  | -0.0928     | 0.0096 | -0.0020 | 0.0145  | -0.0066                 | 0.0011 | -0.0005 | 0.0022  |
|          | LA    | -0.0242     | 0.0102  | -0.0014 | 0.0075  | -0.0771     | 0.1054 | 0.0035  | 0.0231  | -0.1076     | 0.0145 | -0.0024 | 0.0179  | -0.0030                 | 0.0211 | 0.0044  | 0.0074  |
|          | LP    | -0.0069     | 0.0332  | 0.0069  | 0.0067  | -0.0025     | 0.0826 | 0.0125  | 0.0181  | -0.0835     | 0.0317 | 0.0047  | 0.0150  | -0.0064                 | 0.0178 | 0.0085  | 0.0065  |
|          | EC    | -0.0003     | 0.0001  | 0.0000  | 0.0001  | -0.0001     | 0.0001 | 0.0000  | 0.0000  | -0.0001     | 0.0002 | 0.0000  | 0.0000  | -0.0002                 | 0.0000 | 0.0000  | 0.0001  |
|          | RE    | -0.2330     | 0.1476  | -0.0160 | 0.0747  | -0.1294     | 0.1385 | 0.0022  | 0.0584  | -0.2166     | 0.2155 | 0.0069  | 0.0693  | -0.0927                 | 0.0524 | -0.0212 | 0.0471  |
|          | AC    | -0.2169     | 0.0717  | -0.0126 | 0.0549  | -0.0801     | 0.0994 | -0.0023 | 0.0420  | -0.1167     | 0.1454 | 0.0042  | 0.0456  | -0.0780                 | 0.0427 | -0.0088 | 0.0407  |
|          | CI    | -0.1511     | 0.2250  | 0.0130  | 0.0738  | -0.1375     | 0.0908 | -0.0078 | 0.0567  | -0.2232     | 0.2210 | -0.0052 | 0.0706  | -0.0482                 | 0.1067 | 0.0267  | 0.0482  |
|          | FF    | -0.0699     | 0.0124  | -0.0163 | 0.0146  | -0.1162     | 0.0460 | -0.0205 | 0.0275  | -0.0690     | 0.0595 | -0.0117 | 0.0181  | -0.0345                 | 0.0098 | -0.0125 | 0.0110  |
|          | R     | -0.0235     | 0.1072  | 0.0270  | 0.0312  | -0.0928     | 0.0913 | 0.0180  | 0.0381  | -0.0419     | 0.2277 | 0.0297  | 0.0462  | -0.0042                 | 0.0720 | 0.0225  | 0.0257  |
|          | G     | -0.0345     | 0.0762  | 0.0087  | 0.0234  | -0.0293     | 0.0502 | 0.0056  | 0.0144  | -0.0618     | 0.0846 | 0.0068  | 0.0242  | -0.0110                 | 0.0242 | 0.0043  | 0.0106  |
|          | B     | -0.2045     | 0.0768  | -0.0211 | 0.0747  | -0.2926     | 0.0655 | -0.0474 | 0.0841  | -0.1112     | 0.3412 | 0.0186  | 0.0802  | 0.0110                  | 0.1868 | 0.0558  | 0.0557  |
|          | H     | -0.0094     | 0.0110  | -0.0012 | 0.0031  | -0.0081     | 0.0043 | -0.0022 | 0.0027  | -0.0122     | 0.0038 | -0.0022 | 0.0029  | -0.0036                 | 0.0005 | -0.0009 | 0.0014  |
|          | S     | -0.0077     | 0.0237  | 0.0053  | 0.0074  | -0.0130     | 0.0398 | 0.0054  | 0.0110  | -0.0238     | 0.0222 | -0.0023 | 0.0085  | -0.0131                 | 0.0147 | -0.0006 | 0.0085  |
|          | BR    | -0.0307     | 0.0825  | 0.0127  | 0.0253  | -0.0404     | 0.0559 | 0.0068  | 0.0195  | -0.0529     | 0.1363 | 0.0137  | 0.0316  | -0.0175                 | 0.0419 | 0.0082  | 0.0186  |
|          | NRI   | -0.0077     | 0.0469  | 0.0162  | 0.0124  | -0.0310     | 0.0524 | 0.0163  | 0.0180  | -0.0116     | 0.0596 | 0.0126  | 0.0119  | -0.0012                 | 0.0303 | 0.0126  | 0.0109  |
|          | NGI   | -0.0498     | 0.0384  | -0.0021 | 0.0160  | -0.2642     | 0.0635 | -0.0186 | 0.0601  | -0.0898     | 0.0138 | -0.0103 | 0.0204  | -0.0381                 | 0.0078 | -0.0114 | 0.0155  |
|          | NBI   | -0.2000     | 0.0556  | -0.0319 | 0.0563  | -0.1609     | 0.0628 | -0.0266 | 0.0497  | -0.0905     | 0.2380 | 0.0016  | 0.0504  | -0.0430                 | 0.1244 | 0.0087  | 0.0590  |
|          | DGCI  | -0.0310     | 0.0834  | 0.0129  | 0.0256  | -0.0408     | 0.0566 | 0.0069  | 0.0198  | -0.0537     | 0.1378 | 0.0138  | 0.0320  | -0.0180                 | 0.0424 | 0.0084  | 0.0190  |
|          | GRVI  | -1.2702     | 0.0803  | -0.1312 | 0.2347  | -0.4421     | 0.6050 | -0.0404 | 0.1551  | -0.4680     | 0.0231 | -0.0656 | 0.1018  | -0.6584                 | 0.0051 | -0.1168 | 0.1971  |
|          | IKAW  | -0.0743     | 0.2261  | 0.0558  | 0.0738  | -0.0449     | 0.2337 | 0.0784  | 0.0775  | -0.1704     | 0.1963 | 0.0216  | 0.0636  | -0.0983                 | 0.0309 | -0.0190 | 0.0403  |
|          | IPCA  | -0.0485     | 0.1716  | 0.0385  | 0.0509  | -0.0269     | 0.1812 | 0.0397  | 0.0508  | -0.1104     | 0.1280 | 0.0077  | 0.0401  | -0.0541                 | 0.0078 | -0.0172 | 0.0203  |
| P5       | LW    | -0.1472     | 0.1721  | 0.0125  | 0.0714  | -0.1352     | 0.1280 | 0.0093  | 0.0652  | -0.2450     | 0.1676 | 0.0046  | 0.0781  | -0.0891                 | 0.0928 | 0.0019  | 0.0546  |
|          | LL    | -0.0033     | 0.0043  | -0.0001 | 0.0014  | -0.0687     | 0.0084 | -0.0017 | 0.0110  | -0.0037     | 0.0041 | 0.0002  | 0.0011  | -0.0038                 | 0.0016 | -0.0004 | 0.0014  |

| Data set | Index | N treatment |         |         |         | P treatment |         |         |         | K treatment |         |         |         | Normal nutrition supply |         |         |         |
|----------|-------|-------------|---------|---------|---------|-------------|---------|---------|---------|-------------|---------|---------|---------|-------------------------|---------|---------|---------|
|          |       | Min         | Max     | Mean    | Std.dev | Min         | Max     | Mean    | Std.dev | Min         | Max     | Mean    | Std.dev | Min                     | Max     | Mean    | Std.dev |
|          | LA    | -0.0890     | 0.0198  | -0.0018 | 0.0151  | -0.0467     | 0.0199  | -0.0021 | 0.0107  | -0.0404     | 0.0202  | -0.0015 | 0.0103  | -0.0200                 | 0.0083  | -0.0021 | 0.0078  |
|          | LP    | -0.0138     | 0.0104  | -0.0023 | 0.0055  | -0.0771     | 0.0075  | -0.0041 | 0.0127  | -0.0198     | 0.0073  | -0.0014 | 0.0046  | -0.0080                 | 0.0056  | -0.0019 | 0.0042  |
|          | EC    | -0.0001     | 0.0003  | 0.0000  | 0.0001  | -0.0001     | 0.0001  | 0.0000  | 0.0000  | -0.0003     | 0.0001  | 0.0000  | 0.0001  | 0.0000                  | 0.0001  | 0.0000  | 0.0000  |
|          | RE    | -0.1746     | 0.1471  | -0.0163 | 0.0732  | -0.1252     | 0.1265  | -0.0096 | 0.0619  | -0.1633     | 0.2498  | -0.0066 | 0.0787  | -0.0939                 | 0.0957  | -0.0035 | 0.0563  |
|          | AC    | -0.1754     | 0.1341  | -0.0085 | 0.0541  | -0.1082     | 0.1217  | -0.0043 | 0.0473  | -0.1372     | 0.1280  | -0.0130 | 0.0523  | -0.0774                 | 0.1033  | -0.0087 | 0.0511  |
|          | CI    | -0.1489     | 0.1748  | 0.0157  | 0.0737  | -0.1354     | 0.1279  | 0.0110  | 0.0659  | -0.2463     | 0.1681  | 0.0047  | 0.0783  | -0.0907                 | 0.0929  | 0.0023  | 0.0555  |
|          | FF    | -0.0851     | 0.0566  | 0.0040  | 0.0205  | -0.0257     | 0.1075  | 0.0061  | 0.0200  | -0.0423     | 0.0522  | 0.0013  | 0.0154  | -0.0060                 | 0.0235  | 0.0017  | 0.0089  |
|          | R     | -0.0816     | 0.1540  | 0.0361  | 0.0440  | -0.0412     | 0.1401  | 0.0471  | 0.0355  | -0.1093     | 0.1201  | 0.0222  | 0.0445  | 0.0051                  | 0.0419  | 0.0260  | 0.0113  |
|          | G     | -0.0771     | 0.0391  | -0.0085 | 0.0204  | -0.0490     | 0.0327  | 0.0017  | 0.0196  | -0.0850     | 0.0531  | -0.0023 | 0.0283  | -0.0194                 | 0.0732  | 0.0063  | 0.0247  |
|          | B     | -0.0198     | 0.2938  | 0.0864  | 0.0733  | 0.0112      | 0.3306  | 0.1016  | 0.0846  | -0.0318     | 0.1864  | 0.0470  | 0.0521  | -0.0074                 | 0.1636  | 0.0678  | 0.0685  |
|          | H     | -0.0177     | 0.0025  | -0.0034 | 0.0047  | -0.0204     | 0.0033  | -0.0038 | 0.0044  | -0.0200     | 0.0089  | -0.0023 | 0.0044  | -0.0040                 | 0.0017  | -0.0017 | 0.0020  |
|          | S     | -0.0132     | 0.0205  | 0.0009  | 0.0089  | -0.0408     | 0.0120  | -0.0046 | 0.0096  | -0.0210     | 0.0182  | 0.0001  | 0.0091  | -0.0143                 | 0.0069  | -0.0020 | 0.0069  |
|          | BR    | -0.0707     | 0.0679  | 0.0103  | 0.0244  | -0.0391     | 0.0770  | 0.0189  | 0.0219  | -0.0895     | 0.0718  | 0.0071  | 0.0328  | -0.0132                 | 0.0210  | 0.0009  | 0.0113  |
|          | NRI   | -0.0284     | 0.0612  | 0.0096  | 0.0209  | -0.0225     | 0.0512  | 0.0118  | 0.0187  | -0.0252     | 0.0457  | 0.0062  | 0.0139  | -0.0107                 | 0.0080  | -0.0014 | 0.0069  |
|          | NGI   | -0.0964     | -0.0019 | -0.0350 | 0.0238  | -0.1055     | 0.2568  | 0.0189  | 0.0652  | -0.0560     | -0.0009 | -0.0183 | 0.0136  | -0.0464                 | -0.0018 | -0.0177 | 0.0172  |
|          | NBI   | -0.0121     | 0.2327  | 0.0599  | 0.0573  | -0.0769     | 0.2022  | 0.0138  | 0.0731  | -0.0241     | 0.1003  | 0.0310  | 0.0289  | 0.0026                  | 0.1238  | 0.0480  | 0.0467  |
|          | DGCI  | -0.0714     | 0.0692  | 0.0105  | 0.0248  | -0.0396     | 0.0779  | 0.0193  | 0.0222  | -0.0907     | 0.0728  | 0.0073  | 0.0332  | -0.0134                 | 0.0212  | 0.0010  | 0.0114  |
|          | GRVI  | -1.1187     | -0.0067 | -0.2704 | 0.2911  | -0.6240     | -0.0207 | -0.1703 | 0.1188  | -0.7899     | 0.0021  | -0.1302 | 0.1936  | -0.5643                 | -0.0202 | -0.1230 | 0.1724  |
|          | IKAW  | -0.2160     | 0.0358  | -0.0597 | 0.0798  | -0.2529     | 0.0754  | -0.0621 | 0.0810  | -0.1464     | 0.0655  | -0.0359 | 0.0553  | -0.1639                 | 0.0640  | -0.0435 | 0.0827  |
|          | IPCA  | -0.2104     | 0.0358  | -0.0552 | 0.0599  | -0.1880     | 0.0309  | -0.0525 | 0.0496  | -0.1785     | 0.0345  | -0.0398 | 0.0496  | -0.1416                 | 0.0143  | -0.0482 | 0.0493  |
| P6       | LW    | -0.2045     | 0.2595  | -0.0026 | 0.0888  | -0.1171     | 0.1567  | 0.0152  | 0.0606  | -0.1570     | 0.1522  | -0.0067 | 0.0681  | -0.1714                 | 0.1554  | -0.0040 | 0.1064  |
|          | LL    | -0.0223     | 0.0035  | -0.0013 | 0.0040  | -0.0140     | 0.0033  | -0.0017 | 0.0035  | -0.0088     | 0.0048  | -0.0004 | 0.0019  | -0.0324                 | 0.0000  | -0.0049 | 0.0101  |
|          | LA    | -0.0240     | 0.0153  | -0.0023 | 0.0076  | -0.0975     | 0.0162  | -0.0058 | 0.0169  | -0.1114     | 0.0201  | -0.0035 | 0.0185  | -0.0923                 | 0.0049  | -0.0239 | 0.0345  |
|          | LP    | -0.0198     | 0.0185  | 0.0037  | 0.0087  | -0.0096     | 0.0276  | 0.0030  | 0.0085  | -0.0078     | 0.0238  | 0.0023  | 0.0053  | -0.0332                 | 0.0032  | -0.0042 | 0.0110  |
|          | EC    | -0.0005     | 0.0002  | 0.0000  | 0.0001  | -0.0001     | 0.0001  | 0.0000  | 0.0001  | -0.0002     | 0.0003  | 0.0000  | 0.0001  | -0.0002                 | 0.0001  | 0.0000  | 0.0001  |
|          | RE    | -0.2596     | 0.2021  | 0.0011  | 0.0862  | -0.1734     | 0.1140  | -0.0192 | 0.0612  | -0.1541     | 0.1473  | 0.0033  | 0.0656  | -0.1580                 | 0.0977  | -0.0150 | 0.0936  |
|          | AC    | -0.1838     | 0.1652  | 0.0006  | 0.0597  | -0.1401     | 0.1247  | -0.0176 | 0.0548  | -0.1144     | 0.1518  | 0.0037  | 0.0505  | -0.1504                 | 0.0899  | -0.0027 | 0.0730  |
|          | CI    | -0.2080     | 0.2614  | -0.0014 | 0.0904  | -0.1177     | 0.1551  | 0.0169  | 0.0607  | -0.1585     | 0.1529  | -0.0059 | 0.0678  | -0.1712                 | 0.1565  | 0.0010  | 0.1062  |
|          | FF    | -0.0476     | 0.0308  | -0.0103 | 0.0200  | -0.1147     | 0.0162  | -0.0119 | 0.0248  | -0.0988     | 0.0189  | -0.0080 | 0.0177  | -0.0959                 | 0.0199  | -0.0156 | 0.0346  |
|          | R     | -0.0441     | 0.1311  | 0.0457  | 0.0383  | -0.0506     | 0.1360  | 0.0369  | 0.0398  | -0.1187     | 0.1240  | 0.0330  | 0.0375  | -0.0771                 | 0.0307  | -0.0054 | 0.0329  |
|          | G     | -0.0467     | 0.0884  | 0.0188  | 0.0286  | -0.0362     | 0.0990  | 0.0078  | 0.0293  | -0.0891     | 0.0662  | 0.0065  | 0.0265  | -0.0758                 | -0.0018 | -0.0211 | 0.0282  |

| Data set | Index | N treatment |        |         |         | P treatment |         |         |         | K treatment |        |         |         | Normal nutrition supply |         |         |         |
|----------|-------|-------------|--------|---------|---------|-------------|---------|---------|---------|-------------|--------|---------|---------|-------------------------|---------|---------|---------|
|          |       | Min         | Max    | Mean    | Std.dev | Min         | Max     | Mean    | Std.dev | Min         | Max    | Mean    | Std.dev | Min                     | Max     | Mean    | Std.dev |
|          | B     | -0.2216     | 0.1380 | 0.0171  | 0.0852  | -0.2550     | 0.1318  | -0.0033 | 0.0904  | -0.2673     | 0.1390 | 0.0121  | 0.0658  | -0.1327                 | 0.0094  | -0.0436 | 0.0499  |
|          | H     | -0.0135     | 0.0082 | -0.0029 | 0.0047  | -0.0150     | 0.0019  | -0.0039 | 0.0037  | -0.0127     | 0.0018 | -0.0041 | 0.0033  | -0.0044                 | 0.0034  | -0.0011 | 0.0025  |
|          | S     | -0.0169     | 0.0270 | 0.0020  | 0.0086  | -0.0233     | 0.0215  | 0.0024  | 0.0093  | -0.0227     | 0.0245 | 0.0008  | 0.0095  | -0.0167                 | 0.0133  | 0.0000  | 0.0099  |
|          | BR    | -0.0470     | 0.0889 | 0.0273  | 0.0321  | -0.0490     | 0.1087  | 0.0159  | 0.0332  | -0.1081     | 0.0904 | 0.0142  | 0.0299  | -0.0688                 | 0.0470  | -0.0016 | 0.0333  |
|          | NRI   | -0.0102     | 0.0435 | 0.0162  | 0.0123  | 0.0021      | 0.0523  | 0.0199  | 0.0118  | 0.0040      | 0.0380 | 0.0159  | 0.0079  | -0.0364                 | 0.0231  | 0.0085  | 0.0179  |
|          | NGI   | -0.0585     | 0.0341 | -0.0108 | 0.0185  | -0.0381     | 0.0400  | 0.0109  | 0.0173  | -0.0702     | 0.0452 | -0.0105 | 0.0191  | -0.0110                 | 0.0177  | -0.0016 | 0.0096  |
|          | NBI   | -0.1948     | 0.0829 | -0.0125 | 0.0535  | -0.2180     | 0.0036  | -0.0404 | 0.0450  | -0.1330     | 0.1077 | -0.0050 | 0.0405  | -0.0765                 | 0.0587  | -0.0124 | 0.0357  |
|          | DGCI  | -0.0476     | 0.0902 | 0.0277  | 0.0326  | -0.0496     | 0.1102  | 0.0162  | 0.0337  | -0.1096     | 0.0915 | 0.0144  | 0.0303  | -0.0700                 | 0.0476  | -0.0015 | 0.0338  |
|          | GRVI  | -1.0943     | 0.0615 | -0.3152 | 0.3763  | -0.7912     | 0.5758  | -0.1270 | 0.2498  | -0.7032     | 0.6194 | -0.1137 | 0.2094  | -0.1188                 | 0.0696  | -0.0280 | 0.0702  |
|          | IKAW  | -0.1078     | 0.1917 | 0.0353  | 0.0730  | -0.0514     | 0.2319  | 0.0486  | 0.0687  | -0.1477     | 0.1898 | 0.0297  | 0.0618  | -0.0887                 | 0.1132  | 0.0132  | 0.0630  |
|          | IPCA  | -0.0486     | 0.1891 | 0.0506  | 0.0537  | -0.0433     | 0.1760  | 0.0348  | 0.0566  | -0.2020     | 0.1599 | 0.0192  | 0.0683  | -0.0539                 | 0.0956  | 0.0050  | 0.0499  |
| P7       | LW    | -0.2802     | 0.1698 | -0.0021 | 0.1037  | -0.1665     | 0.2471  | 0.0128  | 0.0876  | -0.1618     | 0.1579 | 0.0036  | 0.0681  | -0.1578                 | 0.0597  | -0.0335 | 0.0801  |
|          | LL    | -0.0058     | 0.0029 | -0.0004 | 0.0017  | -0.0475     | 0.0079  | -0.0018 | 0.0097  | -0.0159     | 0.0112 | -0.0006 | 0.0038  | -0.0001                 | 0.0067  | 0.0013  | 0.0027  |
|          | LA    | -0.0711     | 0.0237 | -0.0029 | 0.0134  | -0.1215     | 0.0318  | -0.0066 | 0.0233  | -0.2049     | 0.0865 | -0.0121 | 0.0439  | -0.0045                 | 0.0037  | -0.0007 | 0.0037  |
|          | LP    | -0.7650     | 0.0053 | -0.0191 | 0.1180  | -0.0347     | 0.0266  | -0.0005 | 0.0103  | -0.0040     | 0.0153 | 0.0023  | 0.0052  | -0.0032                 | 0.0079  | 0.0010  | 0.0040  |
|          | EC    | -0.0112     | 0.0004 | -0.0003 | 0.0017  | -0.0004     | 0.0001  | 0.0000  | 0.0001  | -0.0001     | 0.0001 | 0.0000  | 0.0000  | -0.0001                 | 0.0001  | 0.0000  | 0.0001  |
|          | RE    | -0.1704     | 0.2236 | 0.0030  | 0.0925  | -0.2447     | 0.1627  | -0.0176 | 0.0888  | -0.2045     | 0.1603 | -0.0144 | 0.0762  | -0.0628                 | 0.1604  | 0.0315  | 0.0818  |
|          | AC    | -0.1246     | 0.1548 | 0.0021  | 0.0622  | -0.2221     | 0.1466  | -0.0106 | 0.0713  | -0.1930     | 0.1192 | -0.0093 | 0.0581  | -0.0722                 | 0.0614  | 0.0112  | 0.0540  |
|          | CI    | -0.2801     | 0.7909 | 0.0133  | 0.1591  | -0.1676     | 0.2487  | 0.0146  | 0.0882  | -0.1625     | 0.1581 | 0.0035  | 0.0684  | -0.1584                 | 0.0530  | -0.0347 | 0.0788  |
|          | FF    | -0.0592     | 0.0288 | -0.0008 | 0.0147  | -0.0577     | 0.0898  | -0.0056 | 0.0250  | -0.2175     | 0.0657 | -0.0167 | 0.0470  | -0.0121                 | 0.0019  | -0.0027 | 0.0051  |
|          | R     | -0.0919     | 0.0998 | 0.0135  | 0.0399  | -0.0485     | 0.1102  | 0.0313  | 0.0356  | -0.1754     | 0.1486 | 0.0336  | 0.0509  | 0.0150                  | 0.0859  | 0.0535  | 0.0287  |
|          | G     | -0.1023     | 0.0621 | 0.0014  | 0.0356  | -0.0691     | 0.0459  | -0.0022 | 0.0241  | -0.0725     | 0.0790 | 0.0084  | 0.0267  | 0.0048                  | 0.0912  | 0.0434  | 0.0406  |
|          | B     | -0.1106     | 0.3059 | 0.0295  | 0.0662  | -0.0623     | 0.1424  | 0.0259  | 0.0469  | -0.2019     | 0.1878 | 0.0262  | 0.0618  | 0.0608                  | 0.1795  | 0.1159  | 0.0550  |
|          | H     | -0.0085     | 0.0052 | -0.0015 | 0.0034  | -0.0250     | 0.0217  | -0.0031 | 0.0068  | -0.0160     | 0.0177 | -0.0034 | 0.0057  | -0.0093                 | -0.0016 | -0.0055 | 0.0029  |
|          | S     | -0.0117     | 0.0118 | -0.0008 | 0.0058  | -0.0159     | 0.0239  | 0.0024  | 0.0095  | -0.0235     | 0.0155 | -0.0004 | 0.0083  | -0.0114                 | 0.0188  | 0.0015  | 0.0120  |
|          | BR    | -0.0999     | 0.0620 | 0.0069  | 0.0364  | -0.0577     | 0.0664  | 0.0099  | 0.0249  | -0.1143     | 0.1074 | 0.0171  | 0.0354  | -0.0570                 | 0.0072  | -0.0125 | 0.0234  |
|          | NRI   | -0.0197     | 0.0295 | 0.0019  | 0.0114  | -0.0196     | 0.0745  | 0.0150  | 0.0157  | -0.0343     | 0.0356 | 0.0120  | 0.0120  | -0.0035                 | 0.0465  | 0.0149  | 0.0174  |
|          | NGI   | -0.0684     | 0.0157 | -0.0102 | 0.0145  | -0.0453     | 0.0638  | -0.0040 | 0.0232  | -0.0603     | 0.0685 | -0.0131 | 0.0194  | -0.0155                 | 0.0047  | -0.0067 | 0.0073  |
|          | NBI   | -0.0259     | 0.2312 | 0.0180  | 0.0384  | -0.0985     | 0.1118  | -0.0049 | 0.0321  | -0.0608     | 0.0620 | 0.0047  | 0.0244  | -0.0549                 | 0.0070  | -0.0141 | 0.0211  |
|          | DGCI  | -0.1014     | 0.0626 | 0.0070  | 0.0368  | -0.0584     | 0.0672  | 0.0101  | 0.0253  | -0.1159     | 0.1089 | 0.0173  | 0.0359  | -0.0577                 | 0.0073  | -0.0126 | 0.0238  |
|          | GRVI  | -0.4606     | 0.0558 | -0.0646 | 0.1379  | -0.7922     | -0.0085 | -0.2125 | 0.2261  | -0.3928     | 0.0653 | -0.1074 | 0.0982  | -0.1861                 | -0.0135 | -0.0822 | 0.0601  |

| Data set | Index | N treatment |        |         |         | P treatment |        |         |         | K treatment |        |         |         | Normal nutrition supply |        |         |         |
|----------|-------|-------------|--------|---------|---------|-------------|--------|---------|---------|-------------|--------|---------|---------|-------------------------|--------|---------|---------|
|          |       | Min         | Max    | Mean    | Std.dev | Min         | Max    | Mean    | Std.dev | Min         | Max    | Mean    | Std.dev | Min                     | Max    | Mean    | Std.dev |
|          | IKAW  | -0.2041     | 0.0480 | -0.0189 | 0.0438  | -0.0742     | 0.1225 | 0.0095  | 0.0385  | -0.0734     | 0.0742 | 0.0106  | 0.0322  | -0.0044                 | 0.1283 | 0.0474  | 0.0451  |
|          | IPCA  | -0.1365     | 0.0789 | -0.0079 | 0.0468  | -0.0968     | 0.1313 | 0.0065  | 0.0413  | -0.0809     | 0.1095 | 0.0132  | 0.0385  | -0.0965                 | 0.0274 | -0.0126 | 0.0443  |
| P1'      | LW    | -0.1165     | 0.1429 | 0.0102  | 0.0425  | -0.3547     | 0.1302 | 0.0010  | 0.0710  | -0.0520     | 0.1135 | 0.0227  | 0.0374  | -0.0460                 | 0.0864 | 0.0257  | 0.0438  |
|          | LL    | -0.0128     | 0.0843 | 0.0082  | 0.0189  | -0.8045     | 0.0884 | 0.0005  | 0.1300  | -1.0085     | 0.0672 | -0.0095 | 0.1596  | -0.0033                 | 0.0366 | 0.0100  | 0.0139  |
|          | LA    | -0.0258     | 0.1271 | 0.0109  | 0.0297  | -1.3119     | 0.1061 | -0.0087 | 0.2087  | -1.8680     | 0.0771 | -0.0276 | 0.2919  | -0.0043                 | 0.0362 | 0.0125  | 0.0151  |
|          | LP    | -0.0147     | 0.0858 | 0.0082  | 0.0195  | -0.7812     | 0.0885 | 0.0017  | 0.1266  | -1.0148     | 0.0646 | -0.0089 | 0.1606  | -0.0040                 | 0.0360 | 0.0091  | 0.0135  |
|          | EC    | -0.0001     | 0.0001 | 0.0000  | 0.0000  | -0.0017     | 0.0001 | 0.0000  | 0.0003  | -0.0006     | 0.0001 | 0.0000  | 0.0001  | -0.0001                 | 0.0000 | 0.0000  | 0.0000  |
|          | RE    | -0.1392     | 0.1136 | -0.0075 | 0.0448  | -0.1527     | 0.0807 | -0.0101 | 0.0482  | -0.1959     | 0.0364 | -0.0280 | 0.0433  | -0.0884                 | 0.0471 | -0.0231 | 0.0440  |
|          | AC    | -0.0403     | 0.0689 | -0.0004 | 0.0206  | -0.0672     | 0.0639 | -0.0074 | 0.0283  | -0.1306     | 0.0466 | -0.0149 | 0.0306  | -0.0561                 | 0.0196 | -0.0169 | 0.0236  |
|          | CI    | -0.1139     | 0.1245 | 0.0020  | 0.0462  | -0.0953     | 0.4498 | 0.0005  | 0.0829  | -0.0643     | 0.3450 | 0.0158  | 0.0658  | -0.0654                 | 0.0802 | 0.0157  | 0.0432  |
|          | FF    | -0.0446     | 0.0329 | -0.0054 | 0.0162  | -0.0708     | 0.2506 | -0.0121 | 0.0476  | -0.0631     | 0.1616 | -0.0134 | 0.0334  | -0.0360                 | 0.0081 | -0.0058 | 0.0133  |
|          | R     | -0.0509     | 0.2033 | 0.0430  | 0.0425  | -0.0638     | 0.0660 | 0.0107  | 0.0289  | -0.0249     | 0.0659 | 0.0211  | 0.0202  | -0.0128                 | 0.0433 | 0.0103  | 0.0176  |
|          | G     | -0.0212     | 0.0373 | 0.0132  | 0.0139  | -0.0229     | 0.0266 | 0.0031  | 0.0115  | -0.0135     | 0.0242 | 0.0043  | 0.0084  | -0.0213                 | 0.0116 | -0.0051 | 0.0114  |
|          | B     | -0.1045     | 0.1849 | 0.0243  | 0.0541  | -0.0809     | 0.1168 | -0.0010 | 0.0449  | -0.0793     | 0.1731 | 0.0161  | 0.0567  | -0.0752                 | 0.1009 | -0.0021 | 0.0452  |
|          | H     | -0.0117     | 0.0017 | -0.0024 | 0.0022  | -0.0042     | 0.0014 | -0.0010 | 0.0011  | -0.0024     | 0.0019 | -0.0008 | 0.0009  | -0.0017                 | 0.0004 | -0.0007 | 0.0006  |
|          | S     | -0.0095     | 0.0045 | -0.0009 | 0.0029  | -0.0103     | 0.0068 | -0.0005 | 0.0039  | -0.0112     | 0.0070 | -0.0011 | 0.0037  | -0.0029                 | 0.0027 | -0.0006 | 0.0020  |
|          | BR    | -0.0283     | 0.0852 | 0.0207  | 0.0215  | -0.0308     | 0.0340 | 0.0046  | 0.0150  | -0.0145     | 0.0355 | 0.0082  | 0.0114  | -0.0113                 | 0.0177 | 0.0040  | 0.0100  |
|          | NRI   | -0.0157     | 0.0868 | 0.0184  | 0.0166  | -0.0303     | 0.0300 | 0.0058  | 0.0119  | -0.0123     | 0.0284 | 0.0103  | 0.0077  | -0.0057                 | 0.0170 | 0.0059  | 0.0069  |
|          | NGI   | -0.0844     | 0.0231 | -0.0114 | 0.0159  | -0.0893     | 0.0852 | -0.0051 | 0.0346  | -0.0315     | 0.0061 | -0.0065 | 0.0084  | -0.0176                 | 0.0080 | -0.0020 | 0.0065  |
|          | NBI   | -0.0704     | 0.0684 | -0.0004 | 0.0346  | -0.0231     | 0.0357 | -0.0026 | 0.0122  | -0.0898     | 0.1313 | 0.0054  | 0.0462  | -0.0689                 | 0.0543 | -0.0026 | 0.0348  |
|          | DGCI  | -0.0287     | 0.0867 | 0.0210  | 0.0218  | -0.0313     | 0.0348 | 0.0047  | 0.0153  | -0.0149     | 0.0361 | 0.0083  | 0.0116  | -0.0115                 | 0.0180 | 0.0041  | 0.0101  |
|          | GRVI  | -0.1698     | 0.1010 | -0.0614 | 0.0514  | -0.0619     | 0.1449 | -0.0143 | 0.0380  | -0.1107     | 0.0125 | -0.0305 | 0.0247  | -0.0529                 | 0.0052 | -0.0138 | 0.0171  |
|          | IKAW  | -0.0545     | 0.0833 | 0.0181  | 0.0285  | -0.0530     | 0.0721 | 0.0137  | 0.0318  | -0.1077     | 0.0761 | 0.0069  | 0.0405  | -0.0229                 | 0.0572 | 0.0116  | 0.0248  |
|          | IPCA  | -0.0181     | 0.0575 | 0.0142  | 0.0147  | -0.0421     | 0.0360 | 0.0051  | 0.0162  | -0.0328     | 0.0252 | 0.0022  | 0.0139  | -0.0157                 | 0.0256 | 0.0044  | 0.0135  |
| P2'      | LW    | -0.1527     | 0.0684 | -0.0028 | 0.0390  | -0.1169     | 0.4223 | 0.0022  | 0.0758  | -0.1162     | 0.1003 | -0.0094 | 0.0445  | -0.0801                 | 0.0549 | -0.0107 | 0.0343  |
|          | LL    | -0.0015     | 0.0218 | 0.0019  | 0.0053  | -0.0237     | 0.8041 | 0.0210  | 0.1241  | -0.0035     | 0.6297 | 0.0175  | 0.0975  | -0.0004                 | 0.0018 | 0.0006  | 0.0006  |
|          | LA    | -0.0127     | 0.0262 | 0.0008  | 0.0059  | -0.0350     | 1.3083 | 0.0305  | 0.2021  | -0.0054     | 1.1647 | 0.0292  | 0.1796  | -0.0040                 | 0.0018 | -0.0004 | 0.0017  |
|          | LP    | -0.0109     | 0.0283 | -0.0011 | 0.0069  | -0.0276     | 0.7853 | 0.0176  | 0.1217  | -0.0112     | 0.6323 | 0.0146  | 0.0985  | -0.0048                 | 0.0022 | -0.0016 | 0.0020  |
|          | EC    | -0.0001     | 0.0001 | 0.0000  | 0.0000  | 0.0000      | 0.0016 | 0.0000  | 0.0002  | 0.0000      | 0.0004 | 0.0000  | 0.0001  | 0.0000                  | 0.0001 | 0.0000  | 0.0000  |
|          | RE    | -0.0700     | 0.1509 | 0.0017  | 0.0404  | -0.0901     | 0.1116 | 0.0073  | 0.0399  | -0.1016     | 0.1259 | 0.0154  | 0.0476  | -0.0565                 | 0.0796 | 0.0096  | 0.0340  |
|          | AC    | -0.0980     | 0.0437 | -0.0060 | 0.0242  | -0.0518     | 0.0636 | 0.0030  | 0.0254  | -0.0486     | 0.0895 | 0.0067  | 0.0272  | -0.0364                 | 0.0572 | 0.0028  | 0.0267  |

| Data set | Index | N treatment |         |         |         | P treatment |        |         |         | K treatment |        |         |         | Normal nutrition supply |        |         |         |
|----------|-------|-------------|---------|---------|---------|-------------|--------|---------|---------|-------------|--------|---------|---------|-------------------------|--------|---------|---------|
|          |       | Min         | Max     | Mean    | Std.dev | Min         | Max    | Mean    | Std.dev | Min         | Max    | Mean    | Std.dev | Min                     | Max    | Mean    | Std.dev |
|          | CI    | -0.1534     | 0.0683  | -0.0047 | 0.0392  | -0.3818     | 0.0590 | -0.0188 | 0.0679  | -0.2205     | 0.1008 | -0.0177 | 0.0550  | -0.0805                 | 0.0553 | -0.0113 | 0.0345  |
|          | FF    | -0.0493     | 0.0267  | 0.0030  | 0.0124  | -0.2623     | 0.0202 | -0.0047 | 0.0436  | -0.0999     | 0.0250 | 0.0034  | 0.0181  | -0.0053                 | 0.0086 | 0.0027  | 0.0039  |
|          | R     | -0.0034     | 0.0630  | 0.0266  | 0.0139  | -0.0286     | 0.0864 | 0.0357  | 0.0217  | -0.0259     | 0.0912 | 0.0377  | 0.0246  | -0.0085                 | 0.0597 | 0.0267  | 0.0245  |
|          | G     | -0.0209     | 0.0229  | 0.0011  | 0.0093  | -0.0129     | 0.0192 | 0.0027  | 0.0081  | -0.0147     | 0.0402 | 0.0056  | 0.0117  | -0.0112                 | 0.0180 | 0.0009  | 0.0085  |
|          | B     | 0.0120      | 0.1915  | 0.0999  | 0.0609  | -0.0536     | 0.1988 | 0.0922  | 0.0723  | -0.1315     | 0.2492 | 0.0994  | 0.0788  | -0.0825                 | 0.1885 | 0.0639  | 0.1064  |
|          | H     | -0.0046     | 0.0021  | -0.0010 | 0.0015  | -0.0055     | 0.0015 | -0.0014 | 0.0014  | -0.0036     | 0.0016 | -0.0010 | 0.0015  | -0.0023                 | 0.0013 | -0.0003 | 0.0012  |
|          | S     | -0.0190     | 0.0041  | -0.0071 | 0.0060  | -0.0179     | 0.0036 | -0.0071 | 0.0065  | -0.0243     | 0.0047 | -0.0079 | 0.0079  | -0.0169                 | 0.0068 | -0.0059 | 0.0096  |
|          | BR    | -0.0013     | 0.0297  | 0.0116  | 0.0093  | -0.0158     | 0.0365 | 0.0136  | 0.0113  | -0.0180     | 0.0552 | 0.0164  | 0.0146  | -0.0062                 | 0.0274 | 0.0114  | 0.0129  |
|          | NRI   | -0.0184     | 0.0160  | 0.0031  | 0.0067  | -0.0098     | 0.0370 | 0.0104  | 0.0085  | -0.0098     | 0.0333 | 0.0096  | 0.0087  | -0.0060                 | 0.0211 | 0.0068  | 0.0088  |
|          | NGI   | -0.0437     | -0.0059 | -0.0224 | 0.0094  | -0.0187     | 0.1612 | 0.0632  | 0.0634  | -0.0488     | 0.0226 | -0.0225 | 0.0142  | -0.0391                 | 0.0157 | -0.0160 | 0.0207  |
|          | NBI   | -0.0024     | 0.1572  | 0.0764  | 0.0555  | -0.0452     | 0.0202 | -0.0188 | 0.0187  | -0.0995     | 0.1883 | 0.0714  | 0.0681  | -0.0687                 | 0.1672 | 0.0566  | 0.0963  |
|          | DGCI  | -0.0014     | 0.0301  | 0.0117  | 0.0094  | -0.0161     | 0.0371 | 0.0138  | 0.0114  | -0.0182     | 0.0558 | 0.0166  | 0.0148  | -0.0063                 | 0.0278 | 0.0116  | 0.0131  |
|          | GRVI  | -0.8131     | -0.0483 | -0.1856 | 0.1717  | -0.3081     | 0.0240 | -0.0954 | 0.0695  | -0.1929     | 0.0373 | -0.0689 | 0.0427  | -0.1296                 | 0.0251 | -0.0528 | 0.0470  |
|          | IKAW  | -0.1317     | 0.0327  | -0.0600 | 0.0462  | -0.1380     | 0.0773 | -0.0487 | 0.0550  | -0.1356     | 0.1105 | -0.0520 | 0.0666  | -0.1482                 | 0.0834 | -0.0418 | 0.1000  |
|          | IPCA  | -0.0808     | 0.0142  | -0.0352 | 0.0212  | -0.0591     | 0.0292 | -0.0270 | 0.0200  | -0.0590     | 0.0564 | -0.0213 | 0.0321  | -0.0644                 | 0.0455 | -0.0152 | 0.0436  |
|          | LW    | -0.0663     | 0.1034  | 0.0039  | 0.0364  | -0.0623     | 0.1133 | 0.0088  | 0.0310  | -0.0559     | 0.0851 | -0.0028 | 0.0346  | -0.0202                 | 0.0766 | 0.0188  | 0.0303  |
|          | LL    | -0.0113     | 0.0015  | -0.0003 | 0.0018  | -0.0038     | 0.0314 | 0.0004  | 0.0050  | -0.0469     | 0.0048 | -0.0009 | 0.0073  | -0.0035                 | 0.0002 | -0.0006 | 0.0012  |
|          | LA    | -0.0444     | 0.0100  | -0.0013 | 0.0081  | -0.0117     | 0.0545 | 0.0000  | 0.0099  | -0.0759     | 0.0078 | -0.0040 | 0.0149  | -0.0095                 | 0.0143 | 0.0011  | 0.0059  |
|          | LP    | -0.0087     | 0.0052  | 0.0002  | 0.0035  | -0.0042     | 0.0360 | 0.0011  | 0.0060  | -0.0429     | 0.0059 | -0.0001 | 0.0072  | -0.0045                 | 0.0050 | 0.0014  | 0.0037  |
|          | EC    | -0.0001     | 0.0000  | 0.0000  | 0.0000  | -0.0001     | 0.0000 | 0.0000  | 0.0000  | -0.0001     | 0.0000 | 0.0000  | 0.0000  | -0.0001                 | 0.0000 | 0.0000  | 0.0000  |
| P3'      | RE    | -0.1020     | 0.0528  | -0.0060 | 0.0360  | -0.1108     | 0.0694 | -0.0092 | 0.0310  | -0.0863     | 0.0618 | -0.0004 | 0.0350  | -0.0783                 | 0.0307 | -0.0171 | 0.0325  |
|          | AC    | -0.0831     | 0.0385  | -0.0040 | 0.0237  | -0.0982     | 0.0304 | -0.0079 | 0.0237  | -0.0771     | 0.0341 | -0.0043 | 0.0248  | -0.0377                 | 0.0180 | -0.0098 | 0.0184  |
|          | CI    | -0.0661     | 0.1039  | 0.0051  | 0.0376  | -0.0627     | 0.1141 | 0.0083  | 0.0309  | -0.0579     | 0.0854 | -0.0019 | 0.0347  | -0.0202                 | 0.0769 | 0.0194  | 0.0303  |
|          | FF    | -0.0466     | 0.0168  | -0.0020 | 0.0100  | -0.0223     | 0.0084 | -0.0023 | 0.0061  | -0.0705     | 0.0270 | -0.0038 | 0.0130  | -0.0193                 | 0.0084 | -0.0018 | 0.0091  |
|          | R     | -0.0113     | 0.1426  | 0.0400  | 0.0306  | 0.0011      | 0.1226 | 0.0473  | 0.0261  | -0.0317     | 0.1221 | 0.0335  | 0.0305  | 0.0092                  | 0.0523 | 0.0243  | 0.0124  |
|          | G     | -0.0216     | 0.0415  | 0.0058  | 0.0158  | -0.0159     | 0.0467 | 0.0084  | 0.0140  | -0.0400     | 0.0423 | 0.0028  | 0.0156  | -0.0088                 | 0.0370 | 0.0053  | 0.0122  |
|          | B     | -0.1103     | 0.1274  | 0.0444  | 0.0419  | -0.0067     | 0.2011 | 0.0551  | 0.0439  | -0.0157     | 0.2382 | 0.0489  | 0.0472  | 0.0120                  | 0.1337 | 0.0618  | 0.0529  |
|          | H     | -0.0096     | 0.0006  | -0.0030 | 0.0026  | -0.0124     | 0.0001 | -0.0040 | 0.0031  | -0.0140     | 0.0018 | -0.0031 | 0.0029  | -0.0037                 | 0.0001 | -0.0013 | 0.0013  |
|          | S     | -0.0034     | 0.0116  | 0.0022  | 0.0034  | -0.0158     | 0.0104 | -0.0010 | 0.0050  | -0.0096     | 0.0150 | 0.0000  | 0.0053  | -0.0090                 | 0.0072 | -0.0017 | 0.0051  |
|          | BR    | -0.0129     | 0.0774  | 0.0186  | 0.0199  | -0.0099     | 0.0712 | 0.0217  | 0.0167  | -0.0342     | 0.0719 | 0.0139  | 0.0202  | -0.0048                 | 0.0279 | 0.0099  | 0.0099  |

| Data set | Index | N treatment |         |         |         | P treatment |         |         |         | K treatment |         |         |         | Normal nutrition supply |         |         |         |
|----------|-------|-------------|---------|---------|---------|-------------|---------|---------|---------|-------------|---------|---------|---------|-------------------------|---------|---------|---------|
|          |       | Min         | Max     | Mean    | Std.dev | Min         | Max     | Mean    | Std.dev | Min         | Max     | Mean    | Std.dev | Min                     | Max     | Mean    | Std.dev |
|          | NRI   | -0.0003     | 0.0445  | 0.0131  | 0.0087  | 0.0033      | 0.0330  | 0.0163  | 0.0080  | -0.0055     | 0.0325  | 0.0108  | 0.0086  | -0.0032                 | 0.0146  | 0.0051  | 0.0058  |
|          | NGI   | -0.0586     | 0.0094  | -0.0211 | 0.0142  | -0.0247     | 0.1458  | 0.0161  | 0.0339  | -0.0629     | -0.0018 | -0.0199 | 0.0139  | -0.0340                 | 0.0002  | -0.0184 | 0.0124  |
|          | NBI   | -0.0985     | 0.0586  | 0.0175  | 0.0243  | -0.0582     | 0.0531  | -0.0145 | 0.0226  | -0.0114     | 0.1549  | 0.0262  | 0.0283  | -0.0019                 | 0.0991  | 0.0405  | 0.0403  |
|          | DGCI  | -0.0131     | 0.0786  | 0.0189  | 0.0202  | -0.0101     | 0.0722  | 0.0221  | 0.0170  | -0.0347     | 0.0730  | 0.0141  | 0.0205  | -0.0049                 | 0.0283  | 0.0100  | 0.0100  |
|          | GRVI  | -0.7694     | -0.0242 | -0.2028 | 0.2108  | -0.4227     | -0.0307 | -0.1538 | 0.0985  | -0.6289     | -0.0131 | -0.1379 | 0.1399  | -0.3477                 | -0.0010 | -0.0996 | 0.1031  |
|          | IKAW  | -0.0573     | 0.1084  | -0.0072 | 0.0289  | -0.0925     | 0.0477  | -0.0069 | 0.0289  | -0.1395     | 0.0410  | -0.0208 | 0.0375  | -0.1010                 | 0.0213  | -0.0409 | 0.0486  |
|          | IPCA  | -0.0480     | 0.0657  | -0.0032 | 0.0232  | -0.0602     | 0.0393  | -0.0095 | 0.0224  | -0.1056     | 0.0381  | -0.0241 | 0.0299  | -0.0908                 | 0.0232  | -0.0336 | 0.0340  |
