# Supplementary material
Source: MDPI journal article supplement (https://www.mdpi.com/2071-1050/10/3/762)
Supplement: s1 [file s1]

**Table S1: Summary of descriptive analysis for RGR of different indices in the 1<sup>st</sup> incomplete leaf.** RGR: relative growth rate. Min represents minimum value, Max represents maximum value, Mean represents the average value, Std.dev represents standard deviation. P1 represents data set calculated with 3-day intervals from DAT20 to DAT23, by that analogy, we calculated P2 to P7 data sets. P1' represents data set calculated with 6-day intervals from DAT20 to DAT26, by that analogy, we calculated P2' and P3' data sets

| Data set | Index | N treatment |        |         |         | P treatment |        |         |         | K treatment |        |         |         | Normal nutrition supply |         |         |         |
|----------|-------|-------------|--------|---------|---------|-------------|--------|---------|---------|-------------|--------|---------|---------|-------------------------|---------|---------|---------|
|          |       | Min         | Min    | Mean    | Std.dev | Min         | Max    | Mean    | Std.dev | Min         | Max    | Mean    | Std.dev | Min                     | Max     | Mean    | Std.dev |
| P1       | LW    | -0.2504     | 0.4340 | 0.1041  | 0.1277  | -0.0131     | 0.7084 | 0.2317  | 0.1738  | -0.0097     | 0.6660 | 0.1920  | 0.1636  | 0.0023                  | 0.6263  | 0.1838  | 0.2407  |
|          | LL    | -0.4036     | 0.7213 | 0.1800  | 0.1715  | 0.0212      | 0.5144 | 0.2144  | 0.1184  | 0.0658      | 0.5080 | 0.2201  | 0.1297  | 0.0845                  | 0.4781  | 0.2647  | 0.1566  |
|          | LA    | 0.0449      | 0.7133 | 0.3005  | 0.1886  | 0.0327      | 1.0999 | 0.4787  | 0.2869  | 0.1148      | 1.2098 | 0.4496  | 0.3014  | 0.1038                  | 1.1218  | 0.4832  | 0.3954  |
|          | LP    | 0.0284      | 0.3981 | 0.1566  | 0.0990  | 0.0172      | 0.5211 | 0.2149  | 0.1236  | 0.0567      | 0.5100 | 0.2198  | 0.1344  | 0.0700                  | 0.4873  | 0.2555  | 0.1659  |
|          | EC    | -0.0005     | 0.0006 | 0.0001  | 0.0002  | -0.0005     | 0.0004 | -0.0001 | 0.0002  | -0.0005     | 0.0004 | 0.0000  | 0.0002  | -0.0002                 | 0.0004  | 0.0002  | 0.0002  |
|          | RE    | -0.0698     | 0.3729 | 0.0359  | 0.0662  | -0.1671     | 0.1541 | 0.0326  | 0.0633  | -0.0915     | 0.1640 | 0.0375  | 0.0489  | -0.0186                 | 0.1272  | 0.0347  | 0.0497  |
|          | AC    | -0.0495     | 0.1716 | 0.0156  | 0.0347  | -0.1053     | 0.1467 | 0.0232  | 0.0404  | -0.0680     | 0.1204 | 0.0258  | 0.0370  | -0.0053                 | 0.0367  | 0.0151  | 0.0179  |
|          | CI    | -0.3818     | 0.3496 | -0.0513 | 0.1300  | -0.1720     | 0.2318 | 0.0173  | 0.1005  | -0.1667     | 0.1749 | -0.0280 | 0.0895  | -0.2366                 | 0.1482  | -0.0810 | 0.1286  |
|          | FF    | -0.1873     | 0.4501 | -0.0084 | 0.1176  | -0.1192     | 0.2961 | 0.0488  | 0.1043  | -0.1495     | 0.2593 | 0.0099  | 0.0929  | -0.1119                 | 0.1471  | -0.0301 | 0.0906  |
|          | R     | -0.1339     | 0.0529 | -0.0152 | 0.0419  | -0.2337     | 0.0938 | -0.0505 | 0.0855  | -0.2082     | 0.1840 | -0.0490 | 0.0859  | -0.0688                 | 0.0821  | -0.0069 | 0.0647  |
|          | G     | -0.0736     | 0.0511 | -0.0121 | 0.0282  | -0.1219     | 0.1294 | -0.0287 | 0.0619  | -0.1329     | 0.1331 | -0.0354 | 0.0596  | -0.0485                 | -0.0052 | -0.0248 | 0.0157  |
|          | B     | -0.2283     | 0.5208 | 0.0372  | 0.1721  | -0.4397     | 0.2971 | -0.0088 | 0.1699  | -0.2705     | 0.3328 | 0.0709  | 0.1548  | -0.1387                 | 0.4273  | 0.1711  | 0.2219  |
|          | H     | -0.0075     | 0.0047 | 0.0004  | 0.0026  | -0.0036     | 0.0071 | 0.0019  | 0.0024  | -0.0336     | 0.0085 | 0.0014  | 0.0063  | -0.0019                 | 0.0045  | 0.0021  | 0.0023  |
|          | S     | -0.0284     | 0.0086 | -0.0070 | 0.0081  | -0.0301     | 0.0512 | -0.0002 | 0.0166  | -0.0239     | 0.0368 | -0.0066 | 0.0119  | -0.0310                 | 0.0034  | -0.0152 | 0.0141  |
|          | BR    | -0.0837     | 0.0409 | -0.0117 | 0.0287  | -0.1574     | 0.0942 | -0.0340 | 0.0644  | -0.1442     | 0.1513 | -0.0361 | 0.0634  | -0.0487                 | 0.0243  | -0.0167 | 0.0301  |
|          | NRI   | -0.0449     | 0.0257 | -0.0056 | 0.0146  | -0.0691     | 0.0294 | -0.0149 | 0.0228  | -0.0720     | 0.0176 | -0.0194 | 0.0225  | -0.0185                 | 0.0164  | -0.0048 | 0.0153  |
|          | NGI   | -0.0542     | 0.0293 | -0.0018 | 0.0207  | -0.0654     | 0.1216 | 0.0069  | 0.0360  | -0.0712     | 0.0691 | -0.0058 | 0.0329  | -0.0709                 | 0.0206  | -0.0227 | 0.0366  |
|          | NBI   | -0.2555     | 0.5074 | 0.0356  | 0.1509  | -0.4475     | 0.2800 | 0.0269  | 0.1496  | -0.2010     | 0.3233 | 0.1006  | 0.1407  | -0.0874                 | 0.3616  | 0.1733  | 0.1792  |
|          | DGCI  | -0.0852     | 0.0415 | -0.0120 | 0.0292  | -0.1599     | 0.0956 | -0.0346 | 0.0654  | -0.1468     | 0.1544 | -0.0367 | 0.0646  | -0.0498                 | 0.0244  | -0.0172 | 0.0305  |
|          | GRVI  | -0.0845     | 0.1054 | 0.0047  | 0.0466  | -0.1133     | 0.4521 | 0.0670  | 0.1091  | -0.1650     | 0.2963 | 0.0404  | 0.1046  | -0.1356                 | 0.0646  | -0.0273 | 0.0799  |
|          | IKAW  | -0.2544     | 0.0886 | -0.0264 | 0.0927  | -0.3203     | 0.5708 | -0.0199 | 0.1708  | -0.3448     | 0.2561 | -0.0869 | 0.1398  | -0.2520                 | 0.0311  | -0.1062 | 0.1141  |
|          | IPCA  | -0.1544     | 0.0828 | -0.0201 | 0.0570  | -0.1560     | 0.4949 | -0.0175 | 0.1243  | -0.1820     | 0.2188 | -0.0571 | 0.0980  | -0.1004                 | -0.0164 | -0.0616 | 0.0331  |
| P2       | LW    | -0.1366     | 0.1793 | 0.0292  | 0.0636  | -0.0464     | 0.3802 | 0.0631  | 0.0883  | -0.0859     | 0.2712 | 0.0290  | 0.0686  | -0.0260                 | 0.0201  | -0.0038 | 0.0167  |
|          | LL    | -1.5385     | 0.7625 | 0.0403  | 0.2709  | 0.0239      | 0.2708 | 0.1187  | 0.0695  | 0.0331      | 0.2568 | 0.0899  | 0.0530  | 0.0019                  | 0.0682  | 0.0407  | 0.0252  |
|          | LA    | -0.0156     | 0.4073 | 0.0765  | 0.0851  | 0.0142      | 0.5833 | 0.1977  | 0.1402  | 0.0320      | 0.4454 | 0.1334  | 0.1117  | 0.0195                  | 0.0891  | 0.0519  | 0.0266  |
|          | LP    | -0.0242     | 0.2583 | 0.0569  | 0.0543  | 0.0146      | 0.2858 | 0.1196  | 0.0717  | 0.0186      | 0.2454 | 0.0887  | 0.0598  | 0.0164                  | 0.0530  | 0.0391  | 0.0147  |
|          | EC    | -0.0029     | 0.0003 | 0.0000  | 0.0005  | -0.0004     | 0.0004 | 0.0001  | 0.0002  | -0.0003     | 0.0003 | 0.0001  | 0.0001  | 0.0000                  | 0.0001  | 0.0001  | 0.0000  |
|          | RE    | -0.1884     | 0.1616 | -0.0087 | 0.0565  | -0.1390     | 0.1614 | 0.0159  | 0.0465  | -0.0517     | 0.0999 | 0.0144  | 0.0332  | -0.0141                 | 0.0284  | 0.0087  | 0.0162  |

| Data set | Index | N treatment |        |         |         | P treatment |        |         |         | K treatment |        |         |         | Normal nutrition supply |         |         |         |
|----------|-------|-------------|--------|---------|---------|-------------|--------|---------|---------|-------------|--------|---------|---------|-------------------------|---------|---------|---------|
|          |       | Min         | Min    | Mean    | Std.dev | Min         | Max    | Mean    | Std.dev | Min         | Max    | Mean    | Std.dev | Min                     | Max     | Mean    | Std.dev |
|          | AC    | -0.1114     | 0.0613 | -0.0102 | 0.0267  | -0.1035     | 0.1351 | 0.0065  | 0.0317  | -0.0596     | 0.1014 | 0.0020  | 0.0239  | -0.0081                 | 0.0085  | -0.0006 | 0.0063  |
|          | CI    | -0.1666     | 0.3117 | -0.0234 | 0.0787  | -0.2117     | 0.1839 | -0.0556 | 0.0849  | -0.1653     | 0.0937 | -0.0609 | 0.0504  | -0.0757                 | -0.0108 | -0.0446 | 0.0246  |
|          | FF    | -0.1230     | 0.3438 | -0.0263 | 0.0718  | -0.1407     | 0.1826 | -0.0416 | 0.0730  | -0.1514     | 0.0833 | -0.0439 | 0.0439  | -0.0439                 | 0.0108  | -0.0215 | 0.0199  |
|          | R     | -0.1459     | 0.0809 | -0.0079 | 0.0391  | -0.1331     | 0.1399 | -0.0185 | 0.0569  | -0.1204     | 0.0554 | -0.0112 | 0.0423  | -0.0567                 | 0.0545  | 0.0061  | 0.0460  |
|          | G     | -0.0561     | 0.0408 | -0.0165 | 0.0188  | -0.0938     | 0.0412 | -0.0149 | 0.0260  | -0.0804     | 0.0491 | -0.0143 | 0.0244  | -0.0360                 | -0.0030 | -0.0194 | 0.0119  |
|          | B     | -0.3914     | 0.4856 | 0.1187  | 0.2241  | -0.3333     | 0.3386 | 0.0007  | 0.1616  | -0.1699     | 0.3056 | 0.0400  | 0.1240  | -0.0573                 | 0.3963  | 0.1937  | 0.2124  |
|          | H     | -0.0126     | 0.0145 | 0.0014  | 0.0042  | -0.0034     | 0.0045 | 0.0005  | 0.0017  | -0.0052     | 0.0063 | 0.0013  | 0.0026  | -0.0012                 | 0.0109  | 0.0038  | 0.0042  |
|          | S     | -0.0369     | 0.0672 | -0.0093 | 0.0183  | -0.0300     | 0.0144 | -0.0046 | 0.0098  | -0.0331     | 0.0070 | -0.0081 | 0.0100  | -0.0305                 | 0.0028  | -0.0148 | 0.0140  |
|          | BR    | -0.0534     | 0.0539 | -0.0112 | 0.0195  | -0.1007     | 0.0707 | -0.0162 | 0.0341  | -0.0718     | 0.0383 | -0.0118 | 0.0258  | -0.0415                 | 0.0196  | -0.0082 | 0.0243  |
|          | NRI   | -0.0595     | 0.0143 | -0.0078 | 0.0125  | -0.0424     | 0.0448 | -0.0017 | 0.0154  | -0.0470     | 0.0249 | -0.0051 | 0.0146  | -0.0108                 | 0.0012  | -0.0050 | 0.0052  |
|          | NGI   | -0.0625     | 0.0661 | -0.0170 | 0.0343  | -0.0680     | 0.0610 | 0.0019  | 0.0317  | -0.0617     | 0.0467 | -0.0082 | 0.0285  | -0.0604                 | 0.0099  | -0.0305 | 0.0314  |
|          | NBI   | -0.3141     | 0.5064 | 0.1311  | 0.2070  | -0.2649     | 0.3377 | 0.0175  | 0.1277  | -0.1462     | 0.3033 | 0.0461  | 0.1029  | -0.0114                 | 0.3485  | 0.1826  | 0.1703  |
|          | DGCI  | -0.0538     | 0.0543 | -0.0114 | 0.0197  | -0.1023     | 0.0719 | -0.0165 | 0.0346  | -0.0731     | 0.0390 | -0.0121 | 0.0263  | -0.0423                 | 0.0197  | -0.0085 | 0.0246  |
|          | GRVI  | -0.1078     | 0.1877 | -0.0187 | 0.0646  | -0.2312     | 0.1763 | 0.0152  | 0.0821  | -0.1957     | 0.1542 | -0.0016 | 0.0729  | -0.0939                 | 0.0386  | -0.0415 | 0.0578  |
|          | IKAW  | -0.2576     | 0.2284 | -0.0796 | 0.1301  | -0.2938     | 0.2753 | 0.0060  | 0.1296  | -0.3291     | 0.2032 | -0.0580 | 0.1313  | -0.2589                 | 0.0008  | -0.1434 | 0.1197  |
|          | IPCA  | -0.1665     | 0.0808 | -0.0454 | 0.0618  | -0.1590     | 0.0953 | -0.0065 | 0.0603  | -0.1745     | 0.1335 | -0.0320 | 0.0689  | -0.1053                 | -0.0272 | -0.0697 | 0.0353  |
| P3       | LW    | -0.1425     | 0.1219 | 0.0019  | 0.0498  | -0.1724     | 0.1208 | 0.0117  | 0.0506  | -0.0768     | 0.1309 | 0.0088  | 0.0349  | 0.0089                  | 0.0700  | 0.0254  | 0.0231  |
|          | LL    | -0.0007     | 1.6624 | 0.0646  | 0.2513  | -0.0230     | 0.1055 | 0.0325  | 0.0299  | -0.0010     | 0.1096 | 0.0215  | 0.0276  | -0.0003                 | 0.0624  | 0.0190  | 0.0248  |
|          | LA    | -0.0084     | 0.0696 | 0.0191  | 0.0200  | -0.0960     | 0.1433 | 0.0383  | 0.0456  | -0.0053     | 0.1260 | 0.0262  | 0.0352  | -0.0008                 | 0.0291  | 0.0106  | 0.0121  |
|          | LP    | -0.0062     | 0.0678 | 0.0190  | 0.0184  | -0.0154     | 0.1164 | 0.0300  | 0.0332  | -0.0240     | 0.1171 | 0.0195  | 0.0329  | -0.0046                 | 0.0361  | 0.0161  | 0.0178  |
|          | EC    | -0.0104     | 0.0032 | -0.0001 | 0.0017  | -0.0002     | 0.0008 | 0.0001  | 0.0002  | -0.0002     | 0.0003 | 0.0000  | 0.0001  | 0.0000                  | 0.0001  | 0.0000  | 0.0000  |
|          | RE    | -0.1803     | 0.1461 | 0.0005  | 0.0584  | -0.1531     | 0.0795 | -0.0059 | 0.0454  | -0.1246     | 0.0834 | -0.0041 | 0.0362  | -0.0709                 | -0.0042 | -0.0275 | 0.0227  |
|          | AC    | -0.1176     | 0.1264 | 0.0003  | 0.0373  | -0.1333     | 0.1032 | -0.0066 | 0.0354  | -0.0650     | 0.0463 | -0.0001 | 0.0190  | -0.0202                 | 0.0027  | -0.0068 | 0.0101  |
|          | CI    | -0.4165     | 0.6672 | -0.0125 | 0.1345  | -0.2213     | 0.1035 | -0.0208 | 0.0621  | -0.1003     | 0.1315 | -0.0126 | 0.0421  | -0.0535                 | 0.0700  | 0.0064  | 0.0429  |
|          | FF    | -0.4545     | 0.6716 | -0.0140 | 0.1297  | -0.1883     | 0.0837 | -0.0217 | 0.0505  | -0.1083     | 0.1487 | -0.0127 | 0.0434  | -0.0583                 | 0.0122  | -0.0242 | 0.0281  |
|          | R     | -0.1276     | 0.1211 | -0.0051 | 0.0400  | -0.0983     | 0.1504 | 0.0244  | 0.0582  | -0.0306     | 0.1184 | 0.0114  | 0.0287  | -0.0626                 | -0.0044 | -0.0372 | 0.0224  |
|          | G     | -0.0643     | 0.0576 | -0.0067 | 0.0186  | -0.0732     | 0.0373 | -0.0019 | 0.0181  | -0.0455     | 0.0286 | -0.0040 | 0.0152  | -0.0413                 | -0.0060 | -0.0264 | 0.0136  |
|          | B     | -0.1409     | 0.4043 | 0.0178  | 0.0942  | -0.2310     | 0.3452 | 0.0927  | 0.1667  | -0.2099     | 0.3446 | 0.0254  | 0.1300  | -0.0436                 | 0.0321  | -0.0204 | 0.0307  |
|          | H     | -0.0222     | 0.0122 | -0.0015 | 0.0052  | -0.0160     | 0.0038 | -0.0004 | 0.0034  | -0.0062     | 0.0053 | -0.0005 | 0.0025  | -0.0014                 | 0.0007  | -0.0001 | 0.0007  |
|          | S     | -0.0919     | 0.0720 | -0.0034 | 0.0217  | -0.0325     | 0.0102 | -0.0081 | 0.0127  | -0.0362     | 0.0126 | -0.0043 | 0.0128  | -0.0050                 | 0.0068  | 0.0003  | 0.0043  |
|          | BR    | -0.5392     | 0.0555 | -0.0175 | 0.0843  | -0.0598     | 0.0711 | 0.0077  | 0.0290  | -0.0314     | 0.0480 | 0.0004  | 0.0150  | -0.0460                 | -0.0039 | -0.0285 | 0.0162  |

| Data set | Index | N treatment |        |         |         | P treatment |        |         |         | K treatment |        |         |         | Normal nutrition supply |         |         |         |
|----------|-------|-------------|--------|---------|---------|-------------|--------|---------|---------|-------------|--------|---------|---------|-------------------------|---------|---------|---------|
|          |       | Min         | Min    | Mean    | Std.dev | Min         | Max    | Mean    | Std.dev | Min         | Max    | Mean    | Std.dev | Min                     | Max     | Mean    | Std.dev |
|          | NRI   | -0.0629     | 0.0526 | -0.0017 | 0.0148  | -0.0305     | 0.0585 | 0.0046  | 0.0157  | -0.0164     | 0.0347 | 0.0067  | 0.0101  | -0.0146                 | -0.0036 | -0.0084 | 0.0039  |
|          | NGI   | -0.0685     | 0.0530 | -0.0033 | 0.0195  | -0.0669     | 0.0580 | -0.0217 | 0.0385  | -0.0758     | 0.0357 | -0.0088 | 0.0281  | -0.0068                 | 0.0068  | 0.0024  | 0.0055  |
|          | NBI   | -0.0762     | 0.3300 | 0.0204  | 0.0731  | -0.1727     | 0.2684 | 0.0729  | 0.1250  | -0.1750     | 0.2861 | 0.0206  | 0.1086  | -0.0028                 | 0.0314  | 0.0084  | 0.0127  |
|          | DGCI  | -0.5648     | 0.0561 | -0.0183 | 0.0881  | -0.0606     | 0.0727 | 0.0077  | 0.0294  | -0.0321     | 0.0486 | 0.0004  | 0.0152  | -0.0469                 | -0.0041 | -0.0291 | 0.0165  |
|          | GRVI  | -0.1735     | 0.1865 | -0.0022 | 0.0512  | -0.2673     | 0.2152 | -0.0480 | 0.1082  | -0.1484     | 0.0872 | -0.0286 | 0.0556  | -0.0028                 | 0.0395  | 0.0198  | 0.0164  |
|          | IKAW  | -0.2523     | 0.0622 | -0.0231 | 0.0574  | -0.3033     | 0.2022 | -0.0772 | 0.1424  | -0.2869     | 0.2678 | -0.0143 | 0.1341  | -0.0551                 | -0.0096 | -0.0240 | 0.0171  |
|          | IPCA  | -0.0963     | 0.0647 | -0.0136 | 0.0297  | -0.1983     | 0.1075 | -0.0356 | 0.0715  | -0.1303     | 0.1051 | -0.0129 | 0.0646  | -0.0418                 | -0.0205 | -0.0295 | 0.0076  |
| P4       | LW    | -0.1062     | 0.1075 | 0.0025  | 0.0431  | -0.1199     | 0.1291 | -0.0032 | 0.0425  | -0.1082     | 0.1226 | 0.0027  | 0.0409  | -0.0531                 | 0.0397  | -0.0073 | 0.0328  |
|          | LL    | -0.0510     | 0.0646 | 0.0043  | 0.0164  | -0.0480     | 0.0783 | 0.0102  | 0.0216  | -0.0032     | 0.0568 | 0.0059  | 0.0123  | -0.0002                 | 0.0004  | 0.0001  | 0.0003  |
|          | LA    | -0.0435     | 0.0308 | 0.0013  | 0.0133  | -0.0196     | 0.0694 | 0.0152  | 0.0235  | -0.0109     | 0.0436 | 0.0053  | 0.0115  | -0.0029                 | 0.0014  | -0.0004 | 0.0017  |
|          | LP    | -0.0139     | 0.0408 | 0.0062  | 0.0121  | -0.0499     | 0.0778 | 0.0133  | 0.0251  | -0.0060     | 0.0933 | 0.0086  | 0.0188  | -0.0032                 | 0.0036  | 0.0000  | 0.0027  |
|          | EC    | -0.0001     | 0.0105 | 0.0003  | 0.0016  | -0.0001     | 0.0001 | 0.0000  | 0.0000  | -0.0001     | 0.0001 | 0.0000  | 0.0000  | 0.0000                  | 0.0000  | 0.0000  | 0.0000  |
|          | RE    | -0.1196     | 0.1051 | -0.0032 | 0.0464  | -0.0763     | 0.1206 | 0.0083  | 0.0420  | -0.1241     | 0.1081 | -0.0033 | 0.0423  | -0.0409                 | 0.0543  | 0.0068  | 0.0328  |
|          | AC    | -0.0895     | 0.0624 | 0.0008  | 0.0279  | -0.0447     | 0.0931 | 0.0070  | 0.0270  | -0.0585     | 0.0340 | -0.0025 | 0.0205  | -0.0209                 | 0.0241  | 0.0026  | 0.0156  |
|          | CI    | -0.7546     | 0.1043 | -0.0175 | 0.1234  | -0.1234     | 0.1139 | -0.0134 | 0.0427  | -0.1075     | 0.1225 | -0.0033 | 0.0434  | -0.0534                 | 0.0394  | -0.0074 | 0.0328  |
|          | FF    | -0.7444     | 0.0569 | -0.0255 | 0.1155  | -0.1092     | 0.0854 | -0.0113 | 0.0372  | -0.1429     | 0.0324 | -0.0119 | 0.0315  | -0.0080                 | 0.0074  | -0.0004 | 0.0066  |
|          | R     | -0.2389     | 0.1159 | -0.0492 | 0.0849  | -0.1761     | 0.1093 | 0.0070  | 0.0465  | -0.0595     | 0.0740 | 0.0067  | 0.0248  | -0.0133                 | 0.0803  | 0.0088  | 0.0353  |
|          | G     | -0.0696     | 0.0743 | -0.0105 | 0.0239  | -0.0332     | 0.0429 | -0.0021 | 0.0150  | -0.0785     | 0.0430 | -0.0073 | 0.0206  | -0.0089                 | 0.0693  | 0.0068  | 0.0307  |
|          | B     | -0.4214     | 0.1660 | -0.0812 | 0.1532  | -0.6801     | 0.2300 | -0.0053 | 0.1356  | -0.1395     | 0.2362 | 0.0192  | 0.0774  | 0.0005                  | 0.1309  | 0.0304  | 0.0498  |
|          | H     | -0.0138     | 0.0184 | 0.0015  | 0.0062  | -0.0074     | 0.0054 | -0.0009 | 0.0021  | -0.0075     | 0.0034 | -0.0012 | 0.0025  | -0.0036                 | 0.0012  | -0.0012 | 0.0020  |
|          | S     | -0.0918     | 0.1025 | 0.0256  | 0.0451  | -0.0188     | 0.0164 | -0.0013 | 0.0078  | -0.0137     | 0.0146 | -0.0004 | 0.0074  | -0.0093                 | 0.0082  | -0.0032 | 0.0067  |
|          | BR    | -0.1075     | 0.5059 | -0.0085 | 0.0882  | -0.0881     | 0.0552 | 0.0004  | 0.0249  | -0.0627     | 0.0526 | -0.0027 | 0.0205  | -0.0092                 | 0.0746  | 0.0083  | 0.0325  |
|          | NRI   | -0.1043     | 0.0573 | -0.0191 | 0.0345  | -0.0207     | 0.0362 | 0.0056  | 0.0121  | -0.0179     | 0.0236 | 0.0051  | 0.0093  | -0.0055                 | -0.0002 | -0.0026 | 0.0019  |
|          | NGI   | -0.0592     | 0.0821 | 0.0194  | 0.0370  | -0.0596     | 0.1240 | -0.0035 | 0.0295  | -0.0589     | 0.0147 | -0.0089 | 0.0165  | -0.0140                 | -0.0008 | -0.0046 | 0.0049  |
|          | NBI   | -0.3274     | 0.1074 | -0.0506 | 0.1066  | -0.5230     | 0.1749 | -0.0067 | 0.1001  | -0.0798     | 0.2048 | 0.0176  | 0.0651  | 0.0028                  | 0.0476  | 0.0190  | 0.0155  |
|          | DGCI  | -0.1091     | 0.5308 | -0.0081 | 0.0919  | -0.0895     | 0.0560 | 0.0004  | 0.0253  | -0.0636     | 0.0533 | -0.0027 | 0.0209  | -0.0095                 | 0.0761  | 0.0085  | 0.0332  |
|          | GRVI  | -0.1878     | 0.2249 | 0.0528  | 0.0976  | -0.2048     | 0.3651 | -0.0206 | 0.0969  | -0.2024     | 0.0541 | -0.0404 | 0.0521  | -0.0196                 | 0.0076  | -0.0036 | 0.0089  |
|          | IKAW  | -0.0840     | 0.2656 | 0.0289  | 0.0825  | -0.1991     | 0.4006 | 0.0105  | 0.0998  | -0.2231     | 0.1267 | -0.0100 | 0.0852  | -0.0843                 | -0.0050 | -0.0341 | 0.0276  |
|          | IPCA  | -0.0577     | 0.0885 | 0.0074  | 0.0355  | -0.1193     | 0.1789 | -0.0014 | 0.0499  | -0.1709     | 0.0384 | -0.0197 | 0.0484  | -0.0192                 | 0.0385  | -0.0045 | 0.0216  |
| P5       | LW    | -0.1095     | 0.0787 | -0.0115 | 0.0441  | -0.2189     | 0.1327 | 0.0042  | 0.0649  | -0.0995     | 0.1576 | 0.0036  | 0.0549  | -0.0355                 | 0.0724  | 0.0095  | 0.0420  |
|          | LL    | -0.0402     | 0.0198 | 0.0001  | 0.0085  | -0.0088     | 0.0355 | 0.0043  | 0.0097  | -0.0143     | 0.0311 | 0.0011  | 0.0070  | -0.0007                 | 0.0003  | -0.0001 | 0.0003  |

| Data set | Index | N treatment |        |         |         | P treatment |        |         |         | K treatment |        |         |         | Normal nutrition supply |         |         |         |
|----------|-------|-------------|--------|---------|---------|-------------|--------|---------|---------|-------------|--------|---------|---------|-------------------------|---------|---------|---------|
|          |       | Min         | Min    | Mean    | Std.dev | Min         | Max    | Mean    | Std.dev | Min         | Max    | Mean    | Std.dev | Min                     | Max     | Mean    | Std.dev |
|          | LA    | -0.0102     | 0.0945 | 0.0040  | 0.0157  | -0.2798     | 0.0775 | 0.0002  | 0.0473  | -0.0090     | 0.0171 | 0.0014  | 0.0052  | -0.0142                 | 0.0026  | -0.0024 | 0.0066  |
|          | LP    | -0.0529     | 0.0233 | -0.0022 | 0.0113  | -0.0112     | 0.0574 | 0.0047  | 0.0139  | -0.0399     | 0.0806 | 0.0017  | 0.0169  | -0.0021                 | 0.0028  | 0.0000  | 0.0018  |
|          | EC    | 0.0000      | 0.0001 | 0.0000  | 0.0000  | -0.0002     | 0.0005 | 0.0000  | 0.0001  | -0.0002     | 0.0001 | 0.0000  | 0.0000  | -0.0001                 | 0.0000  | 0.0000  | 0.0000  |
|          | RE    | -0.0878     | 0.1219 | 0.0142  | 0.0449  | -0.1353     | 0.0995 | -0.0083 | 0.0559  | -0.1575     | 0.0989 | -0.0033 | 0.0566  | -0.0697                 | 0.0297  | -0.0119 | 0.0424  |
|          | AC    | -0.0816     | 0.0780 | -0.0005 | 0.0268  | -0.0923     | 0.0517 | -0.0051 | 0.0321  | -0.1103     | 0.0582 | -0.0004 | 0.0352  | -0.0326                 | 0.0207  | -0.0044 | 0.0194  |
|          | CI    | -0.1107     | 0.0729 | -0.0125 | 0.0428  | -0.2544     | 0.1258 | -0.0001 | 0.0668  | -0.0994     | 0.1584 | 0.0024  | 0.0553  | -0.0355                 | 0.0725  | 0.0096  | 0.0421  |
|          | FF    | -0.0209     | 0.0478 | 0.0066  | 0.0143  | -0.3657     | 0.0430 | -0.0092 | 0.0605  | -0.1633     | 0.0775 | -0.0021 | 0.0340  | -0.0170                 | 0.0046  | -0.0024 | 0.0079  |
|          | R     | -0.1255     | 0.2328 | 0.0465  | 0.0892  | -0.0713     | 0.2350 | 0.0152  | 0.0515  | -0.0407     | 0.1035 | 0.0160  | 0.0272  | -0.0917                 | 0.0952  | -0.0016 | 0.0594  |
|          | G     | -0.0948     | 0.0797 | 0.0127  | 0.0349  | -0.0796     | 0.0421 | -0.0038 | 0.0242  | -0.0390     | 0.0491 | -0.0034 | 0.0186  | -0.0803                 | 0.0785  | -0.0031 | 0.0504  |
|          | B     | -0.2980     | 0.3873 | 0.0882  | 0.1566  | -0.2113     | 0.5221 | 0.0239  | 0.1071  | -0.1401     | 0.3089 | 0.0230  | 0.0759  | -0.1040                 | 0.1273  | 0.0080  | 0.0736  |
|          | H     | -0.0123     | 0.0042 | -0.0020 | 0.0039  | -0.0085     | 0.0111 | -0.0018 | 0.0033  | -0.0058     | 0.0030 | -0.0015 | 0.0021  | -0.0071                 | -0.0003 | -0.0031 | 0.0026  |
|          | S     | -0.1067     | 0.0880 | -0.0280 | 0.0472  | -0.0168     | 0.0177 | 0.0001  | 0.0085  | -0.0190     | 0.0200 | -0.0006 | 0.0091  | -0.0059                 | 0.0139  | 0.0028  | 0.0084  |
|          | BR    | -0.1002     | 0.1008 | 0.0220  | 0.0447  | -0.0764     | 0.1088 | 0.0025  | 0.0318  | -0.0369     | 0.0578 | 0.0030  | 0.0210  | -0.0840                 | 0.0846  | -0.0022 | 0.0535  |
|          | NRI   | -0.0455     | 0.1045 | 0.0140  | 0.0351  | -0.0241     | 0.0679 | 0.0081  | 0.0144  | -0.0133     | 0.0367 | 0.0079  | 0.0106  | -0.0037                 | 0.0029  | -0.0009 | 0.0026  |
|          | NGI   | -0.0849     | 0.0723 | -0.0197 | 0.0379  | -0.1261     | 0.0424 | -0.0107 | 0.0264  | -0.0618     | 0.0202 | -0.0114 | 0.0160  | -0.0138                 | 0.0077  | -0.0024 | 0.0069  |
|          | NBI   | -0.2180     | 0.2998 | 0.0544  | 0.1054  | -0.1276     | 0.3550 | 0.0156  | 0.0710  | -0.0986     | 0.2575 | 0.0150  | 0.0565  | -0.0160                 | 0.0350  | 0.0087  | 0.0168  |
|          | DGCI  | -0.1017     | 0.1023 | 0.0223  | 0.0453  | -0.0777     | 0.1106 | 0.0025  | 0.0323  | -0.0374     | 0.0588 | 0.0031  | 0.0214  | -0.0856                 | 0.0865  | -0.0022 | 0.0546  |
|          | GRVI  | -0.2334     | 0.1894 | -0.0470 | 0.1010  | -0.2719     | 0.1699 | -0.0432 | 0.0755  | -1.0007     | 0.0354 | -0.0914 | 0.1691  | -0.0312                 | 0.0200  | -0.0030 | 0.0167  |
|          | IKAW  | -0.2423     | 0.1650 | -0.0494 | 0.0779  | -0.2184     | 0.1740 | -0.0057 | 0.0681  | -0.2658     | 0.1437 | -0.0090 | 0.0794  | -0.0553                 | 0.0230  | -0.0157 | 0.0264  |
|          | IPCA  | -0.0978     | 0.0752 | -0.0120 | 0.0400  | -0.1226     | 0.0611 | -0.0138 | 0.0402  | -0.1401     | 0.0450 | -0.0197 | 0.0407  | -0.0677                 | 0.0528  | -0.0087 | 0.0383  |
| P6       | LW    | -0.2657     | 0.0983 | 0.0020  | 0.0655  | -0.2310     | 0.1529 | -0.0019 | 0.0699  | -1.0431     | 0.1777 | -0.0174 | 0.1768  | -0.0434                 | 0.0123  | -0.0104 | 0.0253  |
|          | LL    | -0.1490     | 0.0406 | -0.0022 | 0.0261  | -0.0111     | 0.0096 | 0.0005  | 0.0031  | -1.8016     | 0.0221 | -0.0461 | 0.2885  | -0.0004                 | 0.0006  | 0.0000  | 0.0004  |
|          | LA    | -0.0128     | 0.0105 | -0.0003 | 0.0044  | -0.4450     | 0.0106 | -0.0136 | 0.0790  | -0.0104     | 0.0133 | 0.0006  | 0.0052  | -0.0012                 | 0.0149  | 0.0031  | 0.0062  |
|          | LP    | -0.0074     | 0.0482 | 0.0035  | 0.0090  | -0.0161     | 0.0115 | 0.0009  | 0.0052  | -0.0129     | 0.0232 | 0.0013  | 0.0072  | -0.0047                 | 0.0052  | 0.0002  | 0.0033  |
|          | EC    | -0.0021     | 0.0001 | -0.0001 | 0.0004  | -0.0001     | 0.0003 | 0.0000  | 0.0001  | -0.0056     | 0.0001 | -0.0002 | 0.0009  | 0.0000                  | 0.0001  | 0.0000  | 0.0000  |
|          | RE    | -0.1264     | 0.0872 | -0.0115 | 0.0491  | -0.2176     | 0.0931 | -0.0121 | 0.0673  | -0.1804     | 0.1226 | -0.0107 | 0.0552  | -0.0117                 | 0.0563  | 0.0135  | 0.0284  |
|          | AC    | -0.1017     | 0.0548 | -0.0036 | 0.0329  | -0.1201     | 0.0673 | -0.0055 | 0.0375  | -0.1415     | 0.0855 | -0.0090 | 0.0393  | -0.0117                 | 0.0292  | 0.0051  | 0.0154  |
|          | CI    | -0.1167     | 0.6911 | 0.0224  | 0.1248  | -0.2347     | 0.1537 | -0.0025 | 0.0708  | -0.1275     | 0.1796 | 0.0103  | 0.0535  | -0.0432                 | 0.0125  | -0.0104 | 0.0254  |
|          | FF    | -0.2262     | 0.5594 | 0.0059  | 0.1026  | -0.4526     | 0.0333 | -0.0154 | 0.0807  | -0.0567     | 0.6419 | 0.0146  | 0.1042  | -0.0116                 | 0.0176  | 0.0028  | 0.0104  |
|          | R     | -0.2368     | 0.1737 | -0.0672 | 0.0966  | -0.0531     | 0.1186 | 0.0155  | 0.0362  | -0.0579     | 0.1124 | 0.0237  | 0.0409  | -0.0983                 | 0.1004  | -0.0030 | 0.0637  |
|          | G     | -0.0940     | 0.0637 | -0.0222 | 0.0379  | -0.0616     | 0.0527 | -0.0026 | 0.0215  | -0.0641     | 0.0747 | 0.0091  | 0.0290  | -0.0830                 | 0.0747  | -0.0053 | 0.0501  |

| Data set | Index | N treatment |        |         |         | P treatment |        |         |         | K treatment |        |         |         | Normal nutrition supply |         |         |         |
|----------|-------|-------------|--------|---------|---------|-------------|--------|---------|---------|-------------|--------|---------|---------|-------------------------|---------|---------|---------|
|          |       | Min         | Min    | Mean    | Std.dev | Min         | Max    | Mean    | Std.dev | Min         | Max    | Mean    | Std.dev | Min                     | Max     | Mean    | Std.dev |
|          | B     | -0.3920     | 0.1018 | -0.0975 | 0.1476  | -0.1367     | 0.2091 | 0.0119  | 0.0628  | -0.1608     | 0.1375 | 0.0248  | 0.0618  | -0.1179                 | 0.1589  | 0.0124  | 0.0896  |
|          | H     | -0.0168     | 0.0148 | 0.0011  | 0.0064  | -0.0069     | 0.0028 | -0.0027 | 0.0021  | -0.0056     | 0.0118 | -0.0010 | 0.0031  | -0.0038                 | 0.0008  | -0.0012 | 0.0018  |
|          | S     | -0.0139     | 0.1126 | 0.0294  | 0.0433  | -0.0126     | 0.0238 | 0.0019  | 0.0084  | -0.0331     | 0.0208 | 0.0002  | 0.0099  | -0.0105                 | 0.0037  | -0.0023 | 0.0055  |
|          | BR    | -0.0964     | 0.0670 | -0.0332 | 0.0475  | -0.0589     | 0.0626 | 0.0030  | 0.0250  | -0.0605     | 0.0791 | 0.0142  | 0.0325  | -0.0882                 | 0.0849  | -0.0039 | 0.0552  |
|          | NRI   | -0.1120     | 0.1000 | -0.0228 | 0.0415  | -0.0089     | 0.0248 | 0.0089  | 0.0101  | -0.0319     | 0.0357 | 0.0061  | 0.0135  | -0.0043                 | 0.0017  | -0.0018 | 0.0021  |
|          | NGI   | -0.0803     | 0.0948 | 0.0220  | 0.0408  | -0.0676     | 0.0395 | -0.0091 | 0.0184  | -0.0443     | 0.0332 | -0.0084 | 0.0149  | -0.0240                 | 0.0110  | -0.0041 | 0.0119  |
|          | NBI   | -0.2870     | 0.0698 | -0.0514 | 0.0952  | -0.0935     | 0.1152 | 0.0054  | 0.0383  | -0.0995     | 0.0516 | 0.0072  | 0.0320  | -0.0239                 | 0.0602  | 0.0137  | 0.0284  |
|          | DGCI  | -0.0979     | 0.0682 | -0.0336 | 0.0482  | -0.0599     | 0.0636 | 0.0031  | 0.0255  | -0.0614     | 0.0807 | 0.0145  | 0.0330  | -0.0899                 | 0.0866  | -0.0040 | 0.0563  |
|          | GRVI  | -0.0118     | 0.2704 | 0.0704  | 0.0961  | -0.2937     | 0.1521 | -0.0672 | 0.0876  | -0.5268     | 0.0888 | -0.0495 | 0.1196  | -0.0477                 | 0.0287  | -0.0043 | 0.0259  |
|          | IKAW  | -0.0713     | 0.2150 | 0.0348  | 0.0739  | -0.1411     | 0.1514 | 0.0070  | 0.0572  | -0.1769     | 0.1382 | -0.0060 | 0.0646  | -0.1288                 | 0.0350  | -0.0325 | 0.0560  |
|          | IPCA  | -0.0821     | 0.0685 | -0.0008 | 0.0434  | -0.1358     | 0.0713 | -0.0130 | 0.0412  | -0.0737     | 0.0834 | 0.0046  | 0.0353  | -0.0642                 | 0.0218  | -0.0164 | 0.0276  |
| P7       | LW    | -0.0702     | 0.1794 | 0.0091  | 0.0450  | -0.1668     | 0.0832 | -0.0246 | 0.0506  | -0.1298     | 0.1515 | -0.0077 | 0.0547  | -0.0309                 | 0.0714  | 0.0279  | 0.0469  |
|          | LL    | -0.0086     | 0.0098 | -0.0001 | 0.0026  | -0.0039     | 0.0290 | 0.0015  | 0.0069  | -0.0744     | 0.0052 | -0.0031 | 0.0156  | -0.0003                 | 0.0005  | 0.0000  | 0.0003  |
|          | LA    | -0.0105     | 0.0161 | 0.0011  | 0.0058  | -0.0138     | 0.0071 | -0.0031 | 0.0055  | -0.0385     | 0.0055 | -0.0028 | 0.0087  | -0.0003                 | 0.0052  | 0.0023  | 0.0025  |
|          | LP    | -0.0092     | 0.0164 | 0.0006  | 0.0047  | -0.0068     | 0.0307 | 0.0017  | 0.0078  | -0.0713     | 0.0340 | 0.0001  | 0.0175  | -0.0013                 | 0.0063  | 0.0018  | 0.0032  |
|          | EC    | -0.0001     | 0.0001 | 0.0000  | 0.0000  | 0.0000      | 0.0002 | 0.0000  | 0.0000  | -0.0002     | 0.0001 | 0.0000  | 0.0001  | -0.0001                 | 0.0000  | 0.0000  | 0.0000  |
|          | RE    | -0.1626     | 0.0696 | -0.0082 | 0.0419  | -0.0823     | 0.1685 | 0.0200  | 0.0521  | -0.1480     | 0.1284 | 0.0080  | 0.0528  | -0.0659                 | 0.0301  | -0.0256 | 0.0451  |
|          | AC    | -0.0554     | 0.0249 | -0.0071 | 0.0213  | -0.0522     | 0.1202 | 0.0057  | 0.0355  | -0.0853     | 0.0801 | 0.0065  | 0.0323  | -0.0438                 | 0.0090  | -0.0105 | 0.0230  |
|          | CI    | -0.0737     | 0.1880 | 0.0065  | 0.0490  | -0.1674     | 0.0833 | -0.0261 | 0.0506  | -0.1307     | 0.1566 | -0.0047 | 0.0603  | -0.0315                 | 0.0717  | 0.0279  | 0.0472  |
|          | FF    | -0.0294     | 0.0214 | -0.0011 | 0.0113  | -0.0651     | 0.0161 | -0.0065 | 0.0171  | -0.0797     | 0.1042 | -0.0030 | 0.0296  | -0.0090                 | 0.0078  | -0.0012 | 0.0070  |
|          | R     | -0.0908     | 0.0577 | -0.0069 | 0.0314  | -0.0464     | 0.1377 | 0.0221  | 0.0460  | -0.0661     | 0.0879 | 0.0173  | 0.0410  | 0.0108                  | 0.1197  | 0.0623  | 0.0572  |
|          | G     | -0.0825     | 0.0601 | -0.0114 | 0.0248  | -0.0721     | 0.0731 | -0.0013 | 0.0307  | -0.0686     | 0.0800 | 0.0044  | 0.0291  | 0.0013                  | 0.0887  | 0.0432  | 0.0464  |
|          | B     | -0.1153     | 0.0998 | 0.0071  | 0.0469  | -0.1015     | 0.1190 | 0.0092  | 0.0520  | -0.0642     | 0.1017 | 0.0210  | 0.0426  | 0.0545                  | 0.1889  | 0.1162  | 0.0699  |
|          | H     | -0.0084     | 0.0031 | -0.0010 | 0.0026  | -0.0124     | 0.0021 | -0.0039 | 0.0033  | -0.0080     | 0.0090 | -0.0009 | 0.0031  | -0.0004                 | 0.0047  | 0.0023  | 0.0023  |
|          | S     | -0.0082     | 0.0114 | 0.0001  | 0.0043  | -0.0085     | 0.0074 | -0.0014 | 0.0047  | -0.0137     | 0.0254 | -0.0007 | 0.0082  | -0.0065                 | 0.0016  | -0.0024 | 0.0036  |
|          | BR    | -0.0859     | 0.0603 | -0.0102 | 0.0262  | -0.0667     | 0.0917 | 0.0057  | 0.0353  | -0.0678     | 0.0801 | 0.0091  | 0.0317  | 0.0064                  | 0.1009  | 0.0513  | 0.0501  |
|          | NRI   | -0.0137     | 0.0255 | 0.0012  | 0.0093  | -0.0040     | 0.0387 | 0.0130  | 0.0108  | -0.0247     | 0.0259 | 0.0048  | 0.0118  | -0.0040                 | 0.0024  | -0.0006 | 0.0029  |
|          | NGI   | -0.0199     | 0.0080 | -0.0032 | 0.0058  | -0.0411     | 0.0029 | -0.0104 | 0.0123  | -0.0318     | 0.0291 | -0.0081 | 0.0128  | -0.0286                 | -0.0125 | -0.0197 | 0.0080  |
|          | NBI   | -0.0464     | 0.0962 | 0.0152  | 0.0284  | -0.0331     | 0.0456 | 0.0001  | 0.0193  | -0.0259     | 0.0355 | 0.0085  | 0.0142  | 0.0369                  | 0.0716  | 0.0534  | 0.0160  |
|          | DGCI  | -0.0871     | 0.0611 | -0.0104 | 0.0265  | -0.0677     | 0.0934 | 0.0058  | 0.0359  | -0.0687     | 0.0816 | 0.0092  | 0.0323  | 0.0064                  | 0.1028  | 0.0522  | 0.0511  |
|          | GRVI  | -0.0354     | 0.0365 | 0.0009  | 0.0176  | -0.4509     | 0.0062 | -0.1133 | 0.1290  | -0.2356     | 0.1973 | -0.0295 | 0.0881  | -0.0579                 | -0.0174 | -0.0356 | 0.0205  |

| Data set | Index | N treatment |        |         |         | P treatment |        |         |         | K treatment |        |         |         | Normal nutrition supply |         |         |         |
|----------|-------|-------------|--------|---------|---------|-------------|--------|---------|---------|-------------|--------|---------|---------|-------------------------|---------|---------|---------|
|          |       | Min         | Min    | Mean    | Std.dev | Min         | Max    | Mean    | Std.dev | Min         | Max    | Mean    | Std.dev | Min                     | Max     | Mean    | Std.dev |
|          | IKAW  | -0.1144     | 0.0538 | -0.0175 | 0.0330  | -0.0331     | 0.0808 | 0.0195  | 0.0316  | -0.0791     | 0.0391 | -0.0109 | 0.0312  | -0.1492                 | -0.0820 | -0.1129 | 0.0310  |
|          | IPCA  | -0.0726     | 0.0520 | -0.0167 | 0.0225  | -0.0482     | 0.0680 | -0.0067 | 0.0263  | -0.0715     | 0.0721 | -0.0023 | 0.0339  | -0.0317                 | 0.0263  | -0.0015 | 0.0311  |
| P1'      | LW    | -0.0866     | 0.2797 | 0.0729  | 0.0881  | -0.0066     | 0.3785 | 0.1577  | 0.1196  | -0.0509     | 0.5059 | 0.0457  | 0.0927  | 0.0023                  | 0.3188  | 0.0900  | 0.1235  |
|          | LL    | -0.6853     | 0.2248 | 0.1004  | 0.1339  | 0.0290      | 0.3645 | 0.1714  | 0.0856  | -0.0004     | 0.3310 | 0.0697  | 0.0610  | 0.0644                  | 0.2725  | 0.1527  | 0.0837  |
|          | LA    | 0.0449      | 0.4680 | 0.2140  | 0.1297  | 0.0235      | 0.7832 | 0.3543  | 0.2089  | 0.1148      | 1.2098 | 0.4496  | 0.3014  | -0.0770                 | 0.5999  | 0.2163  | 0.2697  |
|          | LP    | 0.0284      | 0.2225 | 0.1163  | 0.0537  | 0.0287      | 0.3587 | 0.1722  | 0.0879  | 0.0540      | 1.6564 | 0.2251  | 0.3283  | -0.0630                 | 0.2702  | 0.1068  | 0.1405  |
|          | EC    | -0.0003     | 0.0003 | 0.0001  | 0.0001  | -0.0004     | 0.0002 | 0.0000  | 0.0002  | -0.0005     | 0.0002 | 0.0000  | 0.0001  | -0.0001                 | 0.0002  | 0.0001  | 0.0001  |
|          | RE    | -0.0632     | 0.1445 | 0.0153  | 0.0315  | -0.0722     | 0.1010 | 0.0252  | 0.0369  | -0.0341     | 0.0791 | 0.0114  | 0.0235  | 0.0014                  | 0.0670  | 0.0217  | 0.0256  |
|          | AC    | -0.0392     | 0.0638 | 0.0038  | 0.0166  | -0.0564     | 0.0737 | 0.0159  | 0.0209  | -0.0243     | 0.0716 | 0.0072  | 0.0212  | -0.0067                 | 0.0160  | 0.0072  | 0.0092  |
|          | CI    | -0.1700     | 0.1181 | -0.0500 | 0.0633  | -0.1271     | 0.1386 | -0.0137 | 0.0763  | -0.0942     | 0.1749 | -0.0227 | 0.0473  | -0.1237                 | 0.0463  | -0.0628 | 0.0587  |
|          | FF    | -0.1136     | 0.1293 | -0.0270 | 0.0548  | -0.0875     | 0.2149 | 0.0100  | 0.0735  | -0.0736     | 0.2011 | -0.0048 | 0.0486  | -0.0627                 | 0.0596  | -0.0258 | 0.0435  |
|          | R     | -0.0733     | 0.0475 | -0.0095 | 0.0228  | -0.1232     | 0.0381 | -0.0355 | 0.0396  | -0.1228     | 0.0906 | -0.0287 | 0.0395  | -0.0220                 | 0.0073  | -0.0069 | 0.0098  |
|          | G     | -0.0499     | 0.0362 | -0.0127 | 0.0201  | -0.0685     | 0.0467 | -0.0223 | 0.0292  | -0.0748     | 0.0776 | -0.0257 | 0.0324  | -0.0257                 | 0.0226  | -0.0077 | 0.0229  |
|          | B     | -0.1719     | 0.2794 | 0.0847  | 0.1109  | -0.1379     | 0.2246 | -0.0048 | 0.0908  | -0.0741     | 0.2058 | 0.0623  | 0.0771  | -0.1850                 | 0.2960  | 0.0698  | 0.1951  |
|          | H     | -0.0075     | 0.0050 | 0.0003  | 0.0029  | -0.0019     | 0.0039 | 0.0012  | 0.0015  | -0.0171     | 0.0045 | 0.0003  | 0.0033  | 0.0014                  | 0.0045  | 0.0029  | 0.0012  |
|          | S     | -0.0284     | 0.0275 | -0.0092 | 0.0092  | -0.0171     | 0.0292 | -0.0022 | 0.0094  | -0.0181     | 0.0211 | -0.0083 | 0.0069  | -0.0175                 | -0.0112 | -0.0150 | 0.0023  |
|          | BR    | -0.0426     | 0.0325 | -0.0097 | 0.0173  | -0.0818     | 0.0313 | -0.0258 | 0.0296  | -0.0381     | 0.0789 | -0.0023 | 0.0206  | -0.0191                 | -0.0067 | -0.0124 | 0.0045  |
|          | NRI   | -0.0309     | 0.0127 | -0.0067 | 0.0081  | -0.0322     | 0.0126 | -0.0085 | 0.0121  | -0.0396     | 0.0155 | -0.0120 | 0.0130  | -0.0139                 | -0.0023 | -0.0066 | 0.0046  |
|          | NGI   | -0.0309     | 0.0480 | -0.0099 | 0.0186  | -0.0261     | 0.0343 | 0.0047  | 0.0177  | -0.0377     | 0.0336 | -0.0090 | 0.0179  | -0.0320                 | 0.0305  | -0.0074 | 0.0286  |
|          | NBI   | -0.1640     | 0.2765 | 0.0875  | 0.1081  | -0.0998     | 0.2508 | 0.0222  | 0.0829  | -0.0619     | 0.2371 | 0.0790  | 0.0804  | -0.1751                 | 0.2897  | 0.0702  | 0.1888  |
|          | DGCI  | -0.0436     | 0.0328 | -0.0099 | 0.0176  | -0.0832     | 0.0318 | -0.0262 | 0.0301  | -0.0386     | 0.0805 | -0.0024 | 0.0210  | -0.0196                 | -0.0070 | -0.0129 | 0.0045  |
|          | GRVI  | -0.0622     | 0.1323 | -0.0072 | 0.0404  | -0.0527     | 0.1834 | 0.0439  | 0.0580  | -0.0873     | 0.2125 | -0.0212 | 0.0581  | -0.0485                 | -0.0027 | -0.0344 | 0.0165  |
| P2'      | IKAW  | -0.1498     | 0.1246 | -0.0558 | 0.0736  | -0.1921     | 0.1530 | -0.0065 | 0.0890  | -0.1865     | 0.0894 | -0.0679 | 0.0743  | -0.1540                 | -0.1036 | -0.1248 | 0.0173  |
|          | IPCA  | -0.0989     | 0.0956 | -0.0318 | 0.0467  | -0.1220     | 0.1680 | -0.0114 | 0.0652  | -0.1164     | 0.1186 | -0.0328 | 0.0539  | -0.0784                 | -0.0591 | -0.0656 | 0.0070  |
|          | LW    | -0.0603     | 0.0781 | 0.0074  | 0.0265  | -0.0680     | 0.0836 | 0.0080  | 0.0264  | -0.0387     | 0.0959 | 0.0046  | 0.0223  | -0.0025                 | 0.0308  | 0.0091  | 0.0116  |
|          | LL    | -0.0024     | 0.8320 | 0.0340  | 0.1270  | -0.0007     | 0.0882 | 0.0220  | 0.0224  | -0.0005     | 0.0751 | 0.0115  | 0.0205  | 0.0001                  | 0.0313  | 0.0096  | 0.0124  |
|          | LA    | -0.0073     | 0.0759 | 0.0146  | 0.0201  | -0.0023     | 0.1353 | 0.0309  | 0.0346  | -0.0046     | 0.1202 | 0.0188  | 0.0274  | -0.0015                 | 0.0150  | 0.0051  | 0.0063  |
|          | LP    | -0.0036     | 0.0585 | 0.0147  | 0.0143  | -0.0048     | 0.0864 | 0.0219  | 0.0234  | -0.0059     | 0.0725 | 0.0143  | 0.0200  | -0.0005                 | 0.0169  | 0.0081  | 0.0085  |
|          | EC    | 0.0000      | 0.0002 | 0.0000  | 0.0000  | -0.0001     | 0.0001 | 0.0000  | 0.0001  | 0.0000      | 0.0002 | 0.0000  | 0.0001  | 0.0000                  | 0.0000  | 0.0000  | 0.0000  |
|          | RE    | -0.1007     | 0.0636 | -0.0079 | 0.0300  | -0.0483     | 0.0669 | 0.0008  | 0.0220  | -0.0493     | 0.0405 | 0.0002  | 0.0173  | -0.0297                 | 0.0009  | -0.0103 | 0.0109  |
|          | AC    | -0.0440     | 0.0358 | -0.0044 | 0.0156  | -0.0312     | 0.0568 | 0.0004  | 0.0140  | -0.0221     | 0.0249 | -0.0007 | 0.0078  | -0.0091                 | 0.0019  | -0.0021 | 0.0037  |

| Data set | Index | N treatment |        |         |         | P treatment |        |         |         | K treatment |        |         |         | Normal nutrition supply |         |         |         |
|----------|-------|-------------|--------|---------|---------|-------------|--------|---------|---------|-------------|--------|---------|---------|-------------------------|---------|---------|---------|
|          |       | Min         | Min    | Mean    | Std.dev | Min         | Max    | Mean    | Std.dev | Min         | Max    | Mean    | Std.dev | Min                     | Max     | Mean    | Std.dev |
|          | CI    | -0.0775     | 0.0576 | -0.0070 | 0.0301  | -0.0830     | 0.0479 | -0.0140 | 0.0327  | -0.0616     | 0.0483 | -0.0091 | 0.0236  | -0.0247                 | 0.0307  | -0.0005 | 0.0189  |
|          | FF    | -0.0508     | 0.0104 | -0.0164 | 0.0133  | -0.0590     | 0.0440 | -0.0130 | 0.0203  | -0.1242     | 0.0082 | -0.0121 | 0.0244  | -0.0255                 | 0.0021  | -0.0123 | 0.0128  |
|          | R     | -0.0309     | 0.0425 | -0.0071 | 0.0157  | -0.0456     | 0.0941 | 0.0182  | 0.0300  | -0.0339     | 0.0560 | 0.0108  | 0.0175  | -0.0331                 | 0.0325  | -0.0142 | 0.0252  |
|          | G     | -0.0301     | 0.0324 | -0.0062 | 0.0106  | -0.0191     | 0.0278 | -0.0007 | 0.0093  | -0.0465     | 0.0227 | -0.0040 | 0.0124  | -0.0233                 | 0.0278  | -0.0098 | 0.0196  |
|          | B     | -0.0392     | 0.1539 | 0.0040  | 0.0288  | -0.2156     | 0.1899 | 0.0484  | 0.0853  | -0.0638     | 0.1544 | 0.0227  | 0.0507  | -0.0162                 | 0.0664  | 0.0050  | 0.0324  |
|          | H     | -0.0098     | 0.0036 | -0.0005 | 0.0023  | -0.0117     | 0.0024 | -0.0007 | 0.0022  | -0.0062     | 0.0021 | -0.0014 | 0.0018  | -0.0017                 | 0.0009  | -0.0007 | 0.0012  |
|          | S     | -0.0399     | 0.0145 | -0.0015 | 0.0084  | -0.0196     | 0.0050 | -0.0052 | 0.0063  | -0.0066     | 0.0083 | -0.0007 | 0.0037  | -0.0029                 | 0.0016  | -0.0015 | 0.0017  |
|          | BR    | -0.0307     | 0.0357 | -0.0060 | 0.0118  | -0.0223     | 0.0476 | 0.0057  | 0.0152  | -0.0397     | 0.0297 | 0.0018  | 0.0122  | -0.0248                 | 0.0306  | -0.0101 | 0.0214  |
|          | NRI   | -0.0163     | 0.0071 | -0.0021 | 0.0041  | -0.0066     | 0.0407 | 0.0055  | 0.0081  | -0.0069     | 0.0234 | 0.0061  | 0.0069  | -0.0091                 | -0.0027 | -0.0055 | 0.0025  |
|          | NGI   | -0.0253     | 0.0036 | -0.0012 | 0.0044  | -0.0483     | 0.0291 | -0.0134 | 0.0184  | -0.0343     | 0.0203 | -0.0087 | 0.0118  | -0.0080                 | 0.0018  | -0.0011 | 0.0040  |
|          | NBI   | -0.0124     | 0.1235 | 0.0090  | 0.0203  | -0.1766     | 0.1436 | 0.0357  | 0.0651  | -0.0636     | 0.1349 | 0.0180  | 0.0430  | 0.0054                  | 0.0307  | 0.0137  | 0.0096  |
|          | DGCI  | -0.0310     | 0.0362 | -0.0061 | 0.0120  | -0.0227     | 0.0485 | 0.0058  | 0.0154  | -0.0404     | 0.0303 | 0.0019  | 0.0124  | -0.0254                 | 0.0312  | -0.0103 | 0.0218  |
|          | GRVI  | -0.0500     | 0.0197 | 0.0011  | 0.0119  | -0.1411     | 0.0789 | -0.0367 | 0.0498  | -0.6651     | 0.0595 | -0.0490 | 0.1039  | -0.0084                 | 0.0183  | 0.0081  | 0.0109  |
|          | IKAW  | -0.0843     | 0.0188 | -0.0133 | 0.0192  | -0.1432     | 0.1078 | -0.0347 | 0.0616  | -0.0693     | 0.0861 | 0.0021  | 0.0347  | -0.0542                 | -0.0146 | -0.0290 | 0.0147  |
|          | IPCA  | -0.0269     | 0.0248 | -0.0099 | 0.0109  | -0.0680     | 0.0582 | -0.0178 | 0.0287  | -0.0843     | 0.0584 | -0.0087 | 0.0245  | -0.0305                 | 0.0090  | -0.0170 | 0.0138  |
| P3'      | LW    | -0.1876     | 0.0570 | -0.0098 | 0.0390  | -0.1314     | 0.0834 | 0.0060  | 0.0369  | -0.5086     | 0.0985 | -0.0062 | 0.0872  | -0.0167                 | 0.0145  | -0.0004 | 0.0127  |
|          | LL    | -0.0739     | 0.0089 | -0.0016 | 0.0126  | -0.0005     | 0.0319 | 0.0034  | 0.0078  | -0.9009     | 0.0235 | -0.0215 | 0.1446  | -0.0002                 | 0.0001  | 0.0000  | 0.0001  |
|          | LA    | -0.0080     | 0.0168 | 0.0012  | 0.0038  | -0.2011     | 0.0310 | -0.0032 | 0.0370  | -0.0068     | 0.0207 | 0.0018  | 0.0052  | -0.0028                 | -0.0004 | -0.0014 | 0.0010  |
|          | LP    | -0.0078     | 0.0141 | 0.0013  | 0.0042  | -0.0027     | 0.0337 | 0.0037  | 0.0091  | -0.0093     | 0.0268 | 0.0026  | 0.0078  | -0.0012                 | 0.0029  | 0.0005  | 0.0017  |
|          | EC    | 0.0000      | 0.0001 | 0.0000  | 0.0000  | -0.0001     | 0.0002 | 0.0000  | 0.0000  | -0.0028     | 0.0001 | -0.0001 | 0.0005  | 0.0000                  | 0.0000  | 0.0000  | 0.0000  |
|          | RE    | -0.0592     | 0.0642 | 0.0034  | 0.0243  | -0.0853     | 0.0478 | -0.0125 | 0.0300  | -0.0966     | 0.0427 | -0.0082 | 0.0290  | -0.0137                 | 0.0144  | 0.0008  | 0.0116  |
|          | AC    | -0.0377     | 0.0330 | -0.0013 | 0.0152  | -0.0666     | 0.0295 | -0.0054 | 0.0209  | -0.0689     | 0.0513 | -0.0044 | 0.0212  | -0.0033                 | 0.0059  | 0.0003  | 0.0035  |
|          | CI    | -0.1137     | 0.0546 | -0.0081 | 0.0298  | -0.1407     | 0.0837 | 0.0026  | 0.0386  | -0.0422     | 0.0996 | 0.0059  | 0.0297  | -0.0168                 | 0.0147  | -0.0004 | 0.0128  |
|          | FF    | -0.1027     | 0.0144 | -0.0060 | 0.0186  | -0.2168     | 0.0126 | -0.0107 | 0.0394  | -0.0480     | 0.3206 | 0.0033  | 0.0538  | -0.0053                 | 0.0071  | 0.0002  | 0.0040  |
|          | R     | -0.0742     | 0.1151 | -0.0015 | 0.0273  | -0.0232     | 0.0466 | 0.0119  | 0.0178  | -0.0133     | 0.0985 | 0.0208  | 0.0255  | 0.0001                  | 0.0064  | 0.0038  | 0.0024  |
|          | G     | -0.0491     | 0.0266 | -0.0021 | 0.0135  | -0.0348     | 0.0283 | -0.0046 | 0.0116  | -0.0218     | 0.0421 | 0.0031  | 0.0147  | -0.0034                 | 0.0059  | 0.0022  | 0.0043  |
|          | B     | -0.1034     | 0.1057 | 0.0067  | 0.0315  | -0.0513     | 0.0504 | 0.0089  | 0.0204  | -0.0180     | 0.1040 | 0.0281  | 0.0281  | -0.0062                 | 0.0274  | 0.0060  | 0.0145  |
|          | H     | -0.0076     | 0.0024 | -0.0007 | 0.0023  | -0.0064     | 0.0038 | -0.0022 | 0.0022  | -0.0060     | 0.0030 | -0.0010 | 0.0017  | -0.0044                 | 0.0002  | -0.0021 | 0.0019  |
|          | S     | -0.0145     | 0.0452 | 0.0005  | 0.0093  | -0.0078     | 0.0068 | 0.0014  | 0.0032  | -0.0087     | 0.0075 | 0.0001  | 0.0039  | -0.0044                 | 0.0030  | 0.0003  | 0.0027  |
|          | BR    | -0.0517     | 0.0542 | -0.0014 | 0.0167  | -0.0316     | 0.0306 | 0.0004  | 0.0122  | -0.0080     | 0.0534 | 0.0110  | 0.0182  | -0.0057                 | 0.0005  | -0.0031 | 0.0025  |

| Data set | Index | N treatment |        |         |         | P treatment |        |         |         | K treatment |        |         |         | Normal nutrition supply |         |         |         |
|----------|-------|-------------|--------|---------|---------|-------------|--------|---------|---------|-------------|--------|---------|---------|-------------------------|---------|---------|---------|
|          |       | Min         | Min    | Mean    | Std.dev | Min         | Max    | Mean    | Std.dev | Min         | Max    | Mean    | Std.dev | Min                     | Max     | Mean    | Std.dev |
|          | NRI   | -0.0332     | 0.0430 | -0.0013 | 0.0096  | -0.0066     | 0.0227 | 0.0082  | 0.0075  | -0.0066     | 0.0371 | 0.0067  | 0.0106  | -0.0021                 | 0.0019  | 0.0003  | 0.0015  |
|          | NGI   | -0.0458     | 0.0333 | -0.0019 | 0.0097  | -0.0271     | 0.0063 | -0.0083 | 0.0073  | -0.0367     | 0.0029 | -0.0110 | 0.0097  | -0.0082                 | 0.0020  | -0.0013 | 0.0044  |
|          | NBI   | -0.0625     | 0.0336 | 0.0069  | 0.0143  | -0.0212     | 0.0292 | 0.0052  | 0.0112  | -0.0190     | 0.0888 | 0.0140  | 0.0212  | -0.0095                 | 0.0221  | 0.0025  | 0.0141  |
|          | DGCI  | -0.0525     | 0.0553 | -0.0014 | 0.0169  | -0.0321     | 0.0311 | 0.0005  | 0.0124  | -0.0082     | 0.0542 | 0.0111  | 0.0186  | -0.0057                 | 0.0005  | -0.0031 | 0.0025  |
|          | GRVI  | -0.0282     | 0.1032 | 0.0028  | 0.0186  | -0.1916     | 0.0102 | -0.0565 | 0.0534  | -0.3498     | 0.0074 | -0.0569 | 0.0844  | -0.0138                 | 0.0009  | -0.0036 | 0.0056  |
|          | IKAW  | -0.0589     | 0.0350 | -0.0117 | 0.0158  | -0.0497     | 0.0494 | 0.0054  | 0.0234  | -0.1029     | 0.0674 | -0.0191 | 0.0383  | -0.0529                 | -0.0102 | -0.0241 | 0.0183  |
|          | IPCA  | -0.0435     | 0.0238 | -0.0070 | 0.0117  | -0.0808     | 0.0225 | -0.0135 | 0.0176  | -0.0706     | 0.0660 | -0.0096 | 0.0288  | -0.0230                 | -0.0057 | -0.0126 | 0.0064  |
